# Supplementary material for: Synthesis, characterization, and water-degradation of biorenewable polyesters derived from natural camphoric acid
Source: Royal Society of Chemistry journal article supplement (doi:10.1039/c8gc03990a), 2019-01-01
Supplement: c8gc03990a1.pdf [file c8gc03990a1.pdf]

# Synthesis and characterization of biorenewable polyesters derived from natural camphoric acid

Olivier Nsengiyumva<sup>‡</sup> and Stephen A. Miller<sup>‡,\*</sup>

<sup>‡</sup> *The George and Josephine Butler Laboratory for Polymer Research, Department of Chemistry, University of Florida Gainesville, Florida 32611-7200, USA*

## Supporting Information

**Supporting Information Available:** Synthetic details, complete polymer characterization data, and polymer degradation data.

### Table of Contents

|                                                                                     |     |
|-------------------------------------------------------------------------------------|-----|
| General Considerations and Instrumentation .....                                    | S2  |
| Polymerizations .....                                                               | S3  |
| Summary of Polymerization Data .....                                                | S11 |
| Gel Permeation Chromatography (GPC) Chromatograms .....                             | S13 |
| Differential Scanning Calorimetry (DSC) Thermograms .....                           | S24 |
| Thermogravimetric Analysis (TGA) Thermograms .....                                  | S34 |
| <sup>1</sup> H NMR Spectra .....                                                    | S44 |
| <sup>13</sup> C NMR Spectra .....                                                   | S55 |
| Analysis of Copolymer Composition for Polyethylene (Camphorate/Terephthalate) ..... | S66 |
| Degradation Studies .....                                                           | S69 |

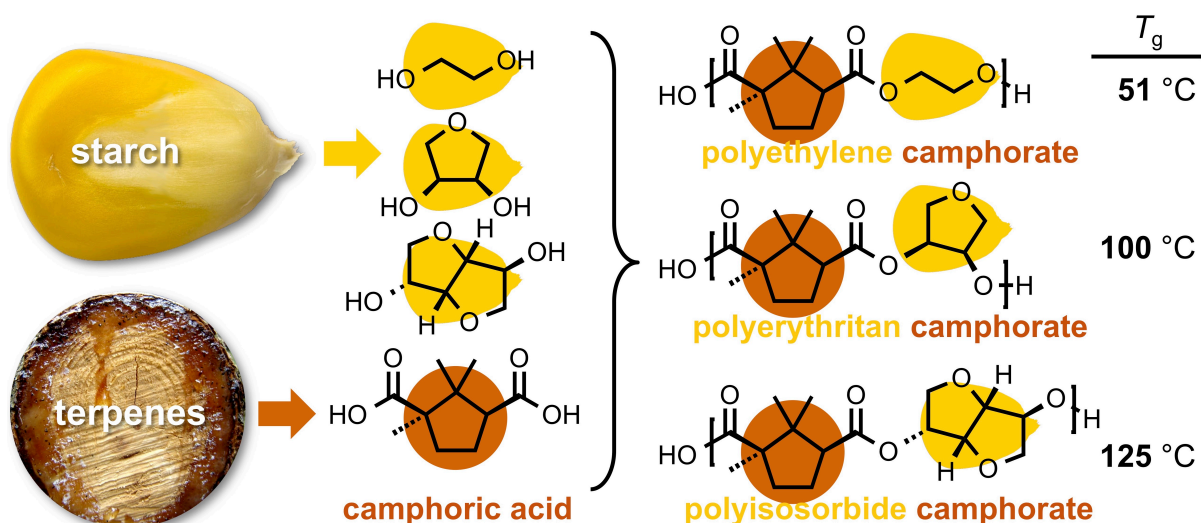

## General Considerations and Instrumentation

### Materials

(+)-Camphoric acid (99%) and ethylene glycol were purchased from Fisher Scientific and used without further purification. 1,3-propanediol (99.6+%), 1,4-butanediol (99%), 1,5-pentanediol (99%), 1,6-hexanediol (99%), bis(2-hydroxyethyl) terephthalate, and *para*-toluenesulfonic acid (*p*-TSA) monohydrate were purchased from Sigma-Aldrich and used as received. “Healthy Foods” erythritol (100% pure) was purchased from Amazon and isosorbide (98%) was purchased from Fisher and recrystallized from ethyl acetate. Antimony Oxide (Sb<sub>2</sub>O<sub>3</sub>, 99.5%), a catalyst for polymerization, was purchased from Acros and used as received. Deionized water and saturated aqueous HCl solution were purchased from Fisher Scientific. NMR solvents, including deuterated chloroform (CDCl<sub>3</sub>) and deuterated trifluoroacetic acid (TFA-*d*), which do not contain tetramethylsilane (TMS), were purchased from Cambridge Isotope Laboratories. All other chemicals, unless expressly mentioned, were utilized as received.

### Characterizations

Proton and carbon nuclear magnetic resonance (<sup>1</sup>H and <sup>13</sup>C NMR) spectra were recorded using an Inova 500 MHz spectrometer. Chemical shifts are reported in parts per million (ppm) downfield relative to tetramethylsilane (TMS, 0.0 ppm) or residual proton and carbon in the specified solvent. Coupling constants (*J*) are reported in Hertz (Hz). Multiplicities are reported using the following abbreviations: s, singlet; d, doublet; t, triplet; q, quartet; quin, quintet; m, multiplet; br, broad.

Differential scanning calorimetry (DSC) thermograms were obtained with a DSC Q1000 from TA instruments. About 3-5 mg of each sample were massed and added to a sealed pan that passed through a heat/cool/heat cycle at 10 °C/min. Reported data are from the second full cycle. The temperature ranged from –50 to 200 °C, depending on the samples.

Thermogravimetric analyses (TGA) were measured under nitrogen with a TGA Q5000 from TA Instruments. About 5-10 mg of each sample were heated at 20 °C/min from 25 to 600 °C.

Gel permeation chromatography (GPC) was performed at 40 °C using an Agilent Technologies 1260 Infinity Series liquid chromatography system with an internal differential refractive index detector, and a PL HFIP gel column (7.5 mm i.d., 300 mm length) using a solution of 0.1% potassium triflate (K(OTf)) in HPLC grade hexafluoroisopropanol (HFIP) as the mobile phase at a flow rate of 0.3 mL min<sup>-1</sup>. Calibration was performed with narrow dispersity polymethylmethacrylate (PMMA) standards.

### Monomer Preparation

#### Synthesis of *cis*-1,4-anhydroerythritol (erythritan)

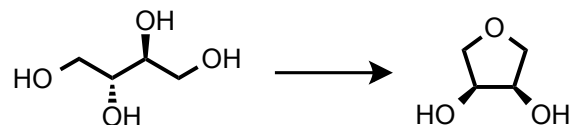

24.4 g (200 mmol) of erythritol were added to a 250 mL round bottom flask equipped with a magnetic stir bar. The temperature was set to 135 °C until erythritol melted. Then 1.90 g (5 mol%) of *p*-toluene sulfonic acid were added and the mixture was stirred for 2.5 hours. After that

time elapsed, the mixture was cooled to 90 °C and then stirred for 1 hour. After that it was cooled to room temperature and 3.36 g (2 mol%) of sodium bicarbonate were added along with 30 g of silica gel. 150 mL of ethyl acetate were added to the mixture and it was stirred for 1 hour. The solids were removed by filtration and washed with an additional 100 mL of ethyl acetate. The solution was then concentrated and a light yellow oil remained. The product was then purified by distillation as follows: a round bottom flask was fitted to a distillation apparatus containing a fractionating column, a reflux condenser, and a collecting flask. The system was heated to 175 °C under reduced pressure (0.5 torr) for 6 hours. After that time had elapsed, 20.0 g of *cis*-1,4-anhydroerythritol was collected (65% yield). <sup>1</sup>H NMR (CDCl<sub>3</sub>): δ ppm 3.66 (dd, *J* = 9.6, 5.0 Hz, 2 H), 3.85 (dd, *J* = 9.5, 4.9 Hz, 2 H), 4.19 (br. s., 2 H), 4.23 (br. s., 2 H). <sup>13</sup>C NMR (CDCl<sub>3</sub>): δ ppm 70.9, 72.3.

### Synthesis of bis(2-hydroxyethyl) camphorate (BHEC)

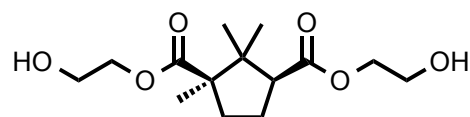

In a 200 mL round bottom flask, 8.00 g (40 mmol) of camphoric and 50 mL of ethylene glycol (excess) were added. 12 mL of concentrated HCl were added and some solid particles formed. More ethylene glycol was added until the mixture became homogeneous. The reaction was heated at 90 °C overnight before neutralization by adding a saturated solution of NaOH in ethylene glycol until the pH of the solution was neutral. Then ethylene glycol was evaporated on a Schlenk line under reduced pressure at 120 °C. Acetone was added to the flask and the formed were removed by filtration. Acetone was evaporated and a light yellow liquid was obtained as the product (7.00 g, 61% yield). <sup>1</sup>H NMR (CDCl<sub>3</sub>): δ 0.87 (s, 3 H), 1.24 (s, 3 H), 1.26 (s, 3 H), 1.53 (m, 1 H), 1.84 (m, 1 H), 2.17 (m, 1 H), 2.54 (m, 1 H), 2.85 (t, *J* = 9.4 Hz, 1 H), 3.83 (m, 2 H), 4.23 (m, 2 H), 4.32 (m, 2H), 4.39 (m, 2H), 4.82, (br s., 2H). <sup>13</sup>C NMR (CDCl<sub>3</sub>): δ 21.5, 21.8, 22.8, 23.1, 31.1, 32.5, 47.0, 53.0, 56.5, 61.4, 64.4, 66.1, 174.6, 181.2.

## Polymerizations

### Polymerization apparatus

The polymerizations were conducted in a round bottom flask that was connected to a rotary evaporation bump trap affixed to a Schlenk line. With this apparatus, the by-product of condensation and volatiles (water primarily) were removed without changing the initial glassware configuration.

### General work-up procedure for polymerizations

All polymers were melted to remove them from the flask and were characterized without further purification. Note: Regioirregularity is introduced because of the unsymmetrical nature of camphoric acid. This can result in additional <sup>1</sup>H and <sup>13</sup>C NMR peaks not prescribed by a regioregular structure.

### Polyethylene camphorate (PEC), dual catalyst process

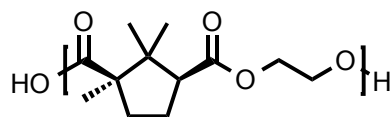

**Table S1, Entry 1.** 2.00 g (10 mmol) of (+)-camphoric acid was added to a 50 mL round bottom flask with a magnetic stir bar. 0.744 g (12.0 mmol) of ethylene glycol and 37 mg of zinc acetate ( $\text{Zn}(\text{OAc})_2$ , 2 mol%) were added to the flask. The polymerization was conducted under melt conditions (no solvent) starting at 180 °C under nitrogen for 10 hours and then 29 mg of antimony oxide ( $\text{Sb}_2\text{O}_3$ , 1 mol%) was added. The mixture was stirred again under nitrogen for 11 hours. After that time had elapsed, the mixture was subjected to dynamic vacuum for 12 hours with a temperature gradient of 180-240 °C. A brown polymer was obtained and removed without further purification (1.70 g, 75 % yield).  $^1\text{H}$  NMR ( $\text{CDCl}_3$ ):  $\delta$  ppm 0.79 (s, 3 H), 1.21 (s, 3 H), 1.24 (br. s., 3 H), 1.52 (m, 1 H), 1.83 (m, 1 H), 2.17 (m, 1 H), 2.55 (m, 1 H), 2.80 (m, 1 H), 4.30 (m, 4 H).  $^{13}\text{C}$  NMR ( $\text{CDCl}_3$ ):  $\delta$  21.3, 21.7, 22.6, 24.5, 32.5, 52.7, 53.9, 56.2, 61.3, 62.2, 173.6, 175.3.

### Polyethylene camphorate (PEC)

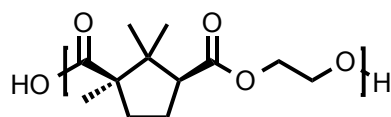

**Table S1, Entry 2.** 2.00 g (10 mmol) of (+)-camphoric acid were added to a 50 mL round bottom flask with a magnetic stir bar. 0.744 g (12.0 mmol) of ethylene glycol and 76 mg (4 mol%) of *p*-toluene sulfonic acid (*p*-TSA) were added to the flask. The polymerization was conducted under melt conditions (no solvent) starting at 180 °C under nitrogen for 17 hours and then subjected to dynamic vacuum for 14 hours with a temperature gradient of 180-230 °C. A light brown polymer was obtained and removed without further purification (1.90 g, 84 % yield).  $^1\text{H}$  NMR ( $\text{CDCl}_3$ ):  $\delta$  ppm 0.79 (s, 3 H), 1.20 (s, 3 H), 1.24 (s, 3 H), 1.51 (m, 1 H), 1.83 (m, 1 H), 2.17 (m, 1 H), 2.55 (m, 1 H), 2.80 (t,  $J$  = 9.5, 1 H), 4.30 (m, 4 H).  $^{13}\text{C}$  NMR ( $\text{CDCl}_3$ ):  $\delta$  ppm 21.0, 21.3, 22.2, 22.7, 32.2, 46.5, 54.2, 53.1, 61.5, 62.0, 173.3, 175.0.

### Polypropylene camphorate

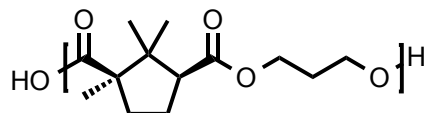

**Table S1, Entry 3.** 2.00 g (10 mmol) of (+)-camphoric acid were added to a 50 mL round bottom flask with a magnetic stir bar. 0.912 g (12.0 mmol) of 1,3-propanediol and 85 mg (5 mol%) of *p*-toluene sulfonic acid (*p*-TSA) were added to the flask. The polymerization was conducted under melt conditions (no solvent) starting at 180 °C under nitrogen for 17 hours and then subjected to dynamic vacuum for 14 hours with a temperature gradient of 180-230 °C. A light brown polymer was obtained and removed without further purification (1.80 g, 75 % yield).  $^1\text{H}$  NMR ( $\text{CDCl}_3$ ):  $\delta$  0.76 (s, 3 H), 1.19 (s, 3 H), 1.23 (m, 3 H), 1.50 (m, 1 H), 1.83 (m, 1 H), 1.99 (m, 2 H), 2.16 (m, 1 H), 2.55 (m, 1 H), 2.78 (t,  $J$  = 9.5 Hz, 1 H), 4.16 (m, 4 H).  $^{13}\text{C}$  NMR ( $\text{CDCl}_3$ ):  $\delta$  21.3, 21.6, 22.5, 23.0, 28.0, 32.4, 46.7, 52.8, 56.2, 60.8, 60.9, 173.8, 175.4.



### Polybutylene camphorate

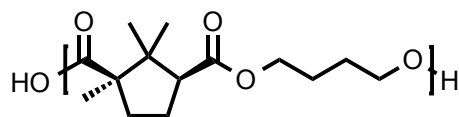

**Table S1, Entry 4.** 2.00 g (10 mmol) of (+)-camphoric acid were added to a 50 mL round bottom flask with a magnetic stir bar. 1.08 g (12.0 mmol) of 1,4-butanediol and 76 mg (4 mol%) of *p*-toluene sulfonic acid (*p*-TSA) were added to the flask. The polymerization was conducted under melt conditions (no solvent) starting at 180 °C under nitrogen for 17 hours and then subjected to dynamic vacuum for 14 hours with a temperature gradient of 180-230 °C. A light brown polymer was obtained and removed without further purification (1.80 g, 71 % yield).  $^1\text{H}$  NMR ( $\text{CDCl}_3$ ):  $\delta$  0.77 (s, 3 H), 1.20 (s, 3 H), 1.24 (s, 3 H), 1.50 (m, 1 H), 1.72 (br. s., 4 H), 1.83 (m, 1 H), 2.17 (m, 1 H), 2.56 (m, 1 H), 2.78 (t,  $J$  = 9.4 Hz, 1 H), 4.11 (m, 4 H).  $^{13}\text{C}$  NMR ( $\text{CDCl}_3$ ):  $\delta$  21.1, 21.4, 22.3, 22.7, 25.20, 25.22, 32.2, 46.5, 52.5, 55.9, 63.5, 173.6, 175.3.

### Polypentylene camphorate

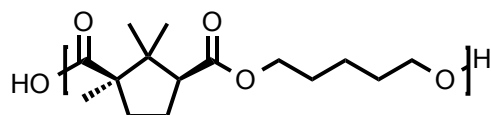

**Table S1, Entry 5.** 2.00 g (10 mmol) of (+)-camphoric acid were added to a 50 mL round bottom flask with a magnetic stir bar. 1.25 g (12.0 mmol) of 1,5-pentanediol and 76 mg (4 mol%) of *p*-toluene sulfonic acid (*p*-TSA) were added to the flask. The polymerization was conducted under melt conditions (no solvent) starting at 180 °C under nitrogen for 17 hours and then subjected to dynamic vacuum for 14 hours with a temperature gradient of 180-230 °C. A light brown polymer was obtained and removed without further purification (1.96 g, 73 % yield).  $^1\text{H}$  NMR ( $\text{CDCl}_3$ ):  $\delta$  0.74 (s, 3 H), 1.17 (br. s., 3 H), 1.21 (br. s., 3 H), 1.43 (m, 2H), 1.46 (m, 1 H), 1.65 (br. s., 4 H), 1.79 (m, 1 H), 2.15 (m, 1 H), 2.54 (m, 1 H), 2.75 (t,  $J$  = 9.5 Hz, 1 H), 4.05 (m, 4 H).  $^{13}\text{C}$  NMR ( $\text{CDCl}_3$ ):  $\delta$  21.2, 21.6, 22.4, 22.6, 22.9, 28.1, 28.2, 32.4, 46.6, 52.8, 56.1, 64.1, 173.9, 175.6.

### Polyhexylene camphorate

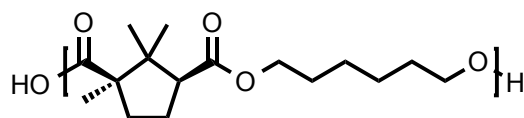

**Table S1, Entry 6.** 2.00 g (10 mmol) of (+)-camphoric acid were added to a 50 mL round bottom flask with a magnetic stir bar. 1.42 g (12.0 mmol) of 1,6-hexanediol and 76 mg (4 mol%) of *p*-toluene sulfonic acid (*p*-TSA) were added to the flask. The polymerization was conducted under melt conditions (no solvent) starting at 180 °C under nitrogen for 17 hours and then subjected to dynamic vacuum for 14 hours with a temperature gradient of 180-230 °C. A light brown polymer was obtained and removed without further purification (2.70 g, 96 % yield).  $^1\text{H}$  NMR ( $\text{CDCl}_3$ ):  $\delta$  0.78 (s, 3 H), 1.20 (s, 3 H), 1.25 (s, 3 H), 1.40 (m, 4 H), 1.50 (m, 1 H), 1.65 (m, 4 H), 1.83 (m, 1 H), 2.18 (m, 1 H), 2.56 (m, 1 H), 2.78 (t,  $J$  = 9.40 Hz, 1 H), 4.07 (m, 4 H).  $^{13}\text{C}$  NMR ( $\text{CDCl}_3$ ):  $\delta$  21.3, 21.7, 22.6, 23.0, 25.7, 28.5, 32.5, 46.7, 52.9, 56.2, 64.3, 173.9, 175.7.

### Polyerythritan camphorate

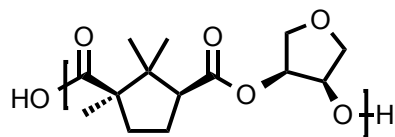

**Table S1, Entry 7.** 2.00 g (10 mmol) of (+)-camphoric acid were added to a 50 mL round bottom flask with a magnetic stir bar. 1.25 g (12.0 mmol) of *cis*-1,4-anhydroerythritol (Erythritan) and 37 mg of zinc acetate ( $\text{Zn}(\text{OAc})_2$ , 2 mol%) were added to the flask. The polymerization was conducted under melt conditions (no solvent) starting at 180 °C under nitrogen for 10 hours and then 29 mg of antimony oxide ( $\text{Sb}_2\text{O}_3$ , 1 mol%) was added. The mixture was stirred again under nitrogen for 11 hours. After that time had elapsed, the mixture was subjected to dynamic vacuum for 12 hours with a temperature gradient of 180-240 °C. A brown polymer was obtained and removed without further purification (1.95 g, 73 % yield).  $^1\text{H}$  NMR ( $\text{CDCl}_3$ ):  $\delta$  0.82 (m, 3 H), 1.06 (m, 3 H), 1.21 (m, 3 H), 1.53 (m, 1 H), 1.65 (m, 1 H), 1.85 (m, 1 H), 2.17 (m, 1 H), 2.54 (m, 1 H), 2.82 (t,  $J = 9.3$  Hz, 1 H), 3.82 (m, 2 H), 4.10 (m, 2 H), 5.17 (br. s., 2 H).  $^{13}\text{C}$  NMR ( $\text{CDCl}_3$ ):  $\delta$  18.7, 21.3, 22.8, 24.2, 24.6, 32.1, 33.9, 46.7, 47.2, 52.2, 53.5, 56.2, 71.6, 172.5, 174.2.

### Polyisosorbide camphorate

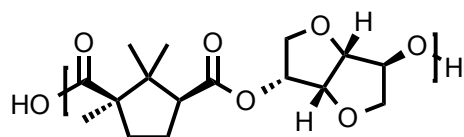

**Table S1, Entry 8.** 1.50 g (7.5 mmol) of (+)-camphoric acid were added to a 50 mL round bottom flask with a magnetic stir bar. 1.31 g (9.0 mmol) of isosorbide and 57 mg (4 mol%) of *p*-toluene sulfonic acid (*p*-TSA) were added to the flask. The polymerization was conducted under melt conditions (no solvent) starting at 180 °C under nitrogen for 17 hours and then subjected to dynamic vacuum for 14 hours with a temperature gradient of 180-240 °C. A light brown polymer was obtained and removed without further purification (2.29 g, 98 % yield).  $^1\text{H}$  NMR ( $\text{CDCl}_3$ ):  $\delta$  0.86 (m, 3H), 1.18 (m, 3 H), 1.23 (m, 3 H), 1.55 (m, 1 H), 1.84 (m, 1 H), 2.17 (m, 1 H), 2.56 (m, 1 H), 2.80 (m, 1 H), 3.78 (m, 1 H), 3.96 (m, 4 H), 4.49 (m, 1 H), 4.83 (m, 1 H), 5.15 (m, 1 H).  $^{13}\text{C}$  NMR ( $\text{CDCl}_3$ ):  $\delta$  19.3, 22.6, 25.0, 32.5, 34.4, 47.0, 47.7, 52.8, 56.5, 70.6, 73.4, 74.1, 78.2, 81.0, 86.2, 173.6, 175.1.

### Copolymerization of bis(2-hydroxyethyl) camphorate (BHEC) and bis(2-hydroxyethyl) terephthalate (BHET)

#### Synthesis of polyethylene camphorate (PEC) (Table S2, Entry 1)

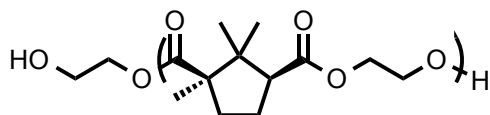

In a 50 mL round bottom flask, 1.00 g (3.47 mmol) of bis(2-hydroxyethyl) camphorate was added to 10 mg (1 mol%) of antimony oxide and a magnetic stir bar. The mixture was stirred from 175 to 240 °C under vacuum on a Schlenk line for 7 hours. After that time had elapsed, a

viscous light brown polymer was obtained and removed without further purification (0.66 g, 84% yield).  $^1\text{H}$  NMR ( $\text{CDCl}_3$ ):  $\delta$  0.80 (s, 3 H), 1.22 (s, 3 H), 1.26 (s, 3 H), 1.55 (m, 1 H), 1.85 (m, 1 H), 2.18 (m, 1 H), 2.57 (m, 1 H), 2.81 (t,  $J$  = 9.5 Hz, 1 H), 4.31 (m, 4 H).  $^{13}\text{C}$  NMR ( $\text{CDCl}_3$ ):  $\delta$  21.0, 21.4, 22.3, 22.7, 24.3, 32.2, 46.5, 52.4, 55.9, 61.9, 173.3, 175.0.

**Synthesis of poly[bis(2-hydroxyethyl) camphorate-co-bis(2-hydroxyethyl) terephthalate]  
90% BHEC/10% BHET (Table S2, Entry 2)**

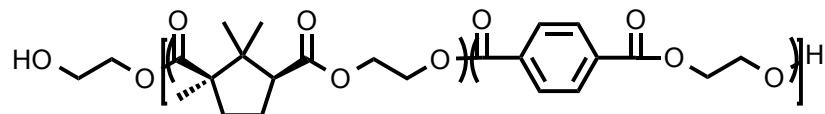

In a 50 mL round bottom flask, 765 mg (2.64 mmol) of bis(2-hydroxyethyl) camphorate were added to 75 mg (0.30 mmol) of bis(2-hydroxyethyl) terephthalate and 17 mg (2 mol%) of antimony oxide with a magnetic stir bar. The mixture was stirred from 200 to 240 °C under vacuum on a Schlenk line for 7 hours. After that time had elapsed, a viscous light brown polymer was obtained and removed without further purification (0.42 g, 64% yield).  $^1\text{H}$  NMR ( $\text{CDCl}_3$ ):  $\delta$  0.79 (s, 3 H), 1.21 (s, 3 H), 1.25 (s, 3 H), 1.52 (m, 1 H), 1.82 (m, 1 H), 2.17 (m, 1 H), 2.56 (m, 1 H), 2.80 (t,  $J$  = 9.3 Hz, 1 H), 4.30 (br. s., 4 H), 4.45 (br. s.), 4.57 (br. s.), 4.70 (br. s.), 8.10 (s).  $^{13}\text{C}$  NMR ( $\text{CDCl}_3$ ):  $\delta$  20.2, 21.3, 21.6, 22.5, 22.9, 24.5, 32.4, 34.2, 46.8, 47.2, 52.7, 53.8, 56.2, 56.5, 62.2, 129.6, 161.8, 163.2, 173.5, 175.2.

**Synthesis of poly[bis(2-hydroxyethyl) camphorate-co-bis(2-hydroxyethyl) terephthalate]  
80% BHEC/20% BHET (Table S2, Entry 3)**

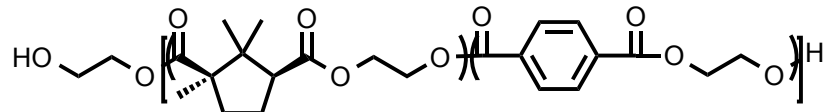

In a 50 mL round bottom flask, 1.13 g (3.93 mmol) of bis(2-hydroxyethyl) camphorate were added to 250 mg (0.983 mmol) of bis(2-hydroxyethyl) terephthalate and 28 mg (2 mol%) of antimony oxide with a magnetic stir bar. The mixture was stirred from 200 to 240 °C under vacuum on a Schlenk line for 7 hours. After that time had elapsed, a viscous light brown polymer was obtained and removed without further purification (0.80 g, 74% yield).  $^1\text{H}$  NMR ( $\text{CDCl}_3$ ):  $\delta$  0.88 (m, 3 H), 1.20 (m, 3 H), 1.24 (s, 3 H), 1.51 (m, 1 H), 1.82 (m, 1 H), 2.17 (m, 1 H), 2.56 (m, 1 H), 2.80 (m, 1 H), 4.30 (br. s., 4 H), 4.44 (br. s.), 4.56 (br. s.), 4.70 (br. s.), 8.09 (m).  $^{13}\text{C}$  NMR ( $\text{CDCl}_3$ ):  $\delta$  19.1, 20.2, 21.3, 21.6, 22.5, 22.9, 24.5, 32.4, 34.1, 46.8, 52.7, 53.8, 56.2, 61.9, 62.2, 63.0, 76.7, 77.3, 129.6, 133.7, 161.8, 162.5, 173.5, 175.2.

**Synthesis of poly[bis(2-hydroxyethyl) camphorate-co-bis(2-hydroxyethyl) terephthalate]  
70% BHEC/30% BHET (Table S2, Entry 4)**

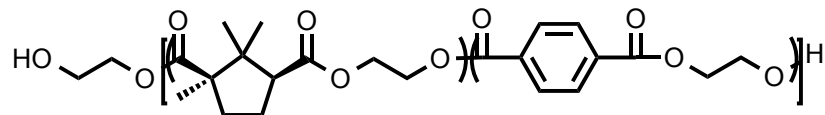

In a 50 mL round bottom flask, 1.06 g (3.67 mmol) of bis(2-hydroxyethyl) camphorate were added to 400 mg (1.57 mmol) of bis(2-hydroxyethyl) terephthalate and 15 mg (1 mol%) of antimony oxide with a magnetic stir bar. The mixture was stirred from 200 to 240 °C under

vacuum on a Schlenk line for 7 hours. After that time had elapsed, a viscous light brown polymer was obtained and removed without further purification (0.97 g, 86% yield).  $^1\text{H}$  NMR ( $\text{CDCl}_3$ ):  $\delta$  0.78 (s, 3 H), 1.20 (s, 3 H), 1.24 (s, 3 H), 1.51 (m, 1 H), 1.82 (m, 1 H), 2.17 (m, 2 H), 2.56 (m, 1 H), 2.80 (m, 1 H), 4.30 (m, 4 H), 4.44 (br. s.), 4.56 (br. s.), 4.70 (br. s.), 8.09 (m).  $^{13}\text{C}$  NMR ( $\text{CDCl}_3$ ):  $\delta$  20.2, 21.3, 21.6, 22.5, 22.9, 24.5, 32.4, 34.1, 46.8, 52.7, 53.8, 56.2, 61.9, 62.1, 63.0, 63.2, 129.6, 133.7, 142.1, 162.5, 165.4, 175.2, 176.7.

**Synthesis of poly[bis(2-hydroxyethyl) camphorate-co-bis(2-hydroxyethyl) terephthalate]  
60% BHEC/40% BHET (Table S2, Entry 5)**

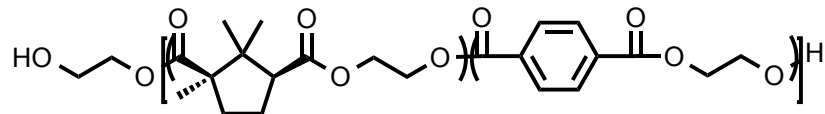

In a 50 mL round bottom flask, 700 mg (2.42 mmol) of bis(2-hydroxyethyl) camphorate were added to 412 mg (1.62 mmol) of bis(2-hydroxyethyl) terephthalate and 12 mg (1 mol%) of antimony oxide with a magnetic stir bar. The mixture was stirred from 200 to 240 °C under vacuum on a Schlenk line for 7 hours. After that time had elapsed, a viscous light brown polymer was obtained and removed without further purification (0.71 g, 83% yield).  $^1\text{H}$  NMR ( $\text{CDCl}_3$ ):  $\delta$  0.78 (s, 3 H), 1.20 (s, 3 H), 1.23 (s, 3 H), 1.51 (m, 1 H), 1.82 (m, 1 H), 2.17 (m, 1 H), 2.56 (m, 1 H), 2.83 (m, 1 H), 4.29 (br. s., 4 H), 4.44 (br. s.), 4.56 (br. s.), 4.70 (br. s.), 8.11 (s).  $^{13}\text{C}$  NMR ( $\text{CDCl}_3$ ):  $\delta$  19.2, 20.2, 21.3, 21.6, 22.8, 22.9, 24.5, 32.4, 34.2, 46.8, 52.7, 56.2, 61.9, 63.0, 129.7, 133.7, 142.8, 143.5, 162.5, 165.4.

**Synthesis of poly[bis(2-hydroxyethyl) camphorate-co-bis(2-hydroxyethyl) terephthalate]  
50% BHEC/50% BHET (Table S2, Entry 6)**

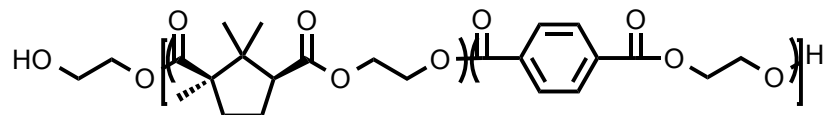

In a 50 mL round bottom flask, 1.50 g (5.2 mmol) of bis(2-hydroxyethyl) camphorate were added to 1.32 g (5.2 mmol) of bis(2-hydroxyethyl) terephthalate and 30 mg (2 mol%) of antimony oxide with a magnetic stir bar. The mixture was stirred from 200 to 240 °C under vacuum on a Schlenk line for 7 hours. After that time had elapsed, a viscous light brown polymer was obtained and removed without further purification (2.07 g, 95% yield).  $^1\text{H}$  NMR ( $\text{CDCl}_3$ ):  $\delta$  0.78 (br. s., 3 H), 1.20 (br. s., 3 H), 1.23 (br. s., 3 H), 1.51 (m, 1 H), 1.82 (m, 1 H), 2.17 (m, 1 H), 2.56 (m, 1 H), 2.82 (m, 1 H), 4.29 (br. s., 4 H), 4.43 (br. s.), 4.56 (m), 4.70 (br. s.), 8.11 (br. s.).  $^{13}\text{C}$  NMR ( $\text{CDCl}_3$ ):  $\delta$  18.8, 19.8, 21.0, 21.4, 22.2, 22.6, 24.3, 32.2, 33.9, 46.6, 52.4, 53.6, 56.0, 61.7, 62.8, 129.5, 133.4, 161.6, 162.3, 165.2, 175.0.

**Synthesis of poly[bis(2-hydroxyethyl) camphorate-co-bis(2-hydroxyethyl) terephthalate]  
40% BHEC/60% BHET (Table S2, Entry 7)**

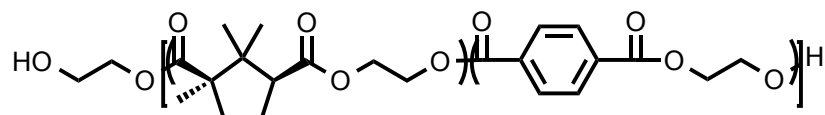

In a 50 mL round bottom flask, 1.00 g (3.47 mmol) of bis(2-hydroxyethyl) camphorate was added to 1.32 g (5.2 mmol) of bis(2-hydroxyethyl) terephthalate and 25 mg (2 mol%) of antimony oxide with a magnetic stir bar. The mixture was stirred from 200 to 240 °C under vacuum on a Schlenk line for 7 hours. After that time had elapsed, a viscous light brown polymer was obtained and removed without further purification (1.60 g, 90% isolated yield). <sup>1</sup>H NMR (CDCl<sub>3</sub>): δ 0.77 (br. s., 3 H), 1.19 (br. s., 3 H), 1.23 (br. s., 3 H), 1.49 (m, 1 H), 1.80 (m, 1 H), 2.17 (m, 1 H), 2.57 (m, 1 H), 2.82 (m, 1 H), 4.28 (br. s., 4 H), 4.43 (m), 4.55 (br. s.), 4.69 (s), 8.10 (m). <sup>13</sup>C NMR (CDCl<sub>3</sub>): δ 18.6, 19.9, 21.0, 21.3, 22.3, 22.6, 24.2, 32.2, 33.9, 46.6, 52.4, 53.6, 56.0, 61.7, 62.7, 129.5, 133.4, 162.4, 165.2.

**Synthesis of poly[bis(2-hydroxyethyl) camphorate-co-bis(2-hydroxyethyl) terephthalate] 30% BHEC/70% BHET (Table S2, Entry 8)**

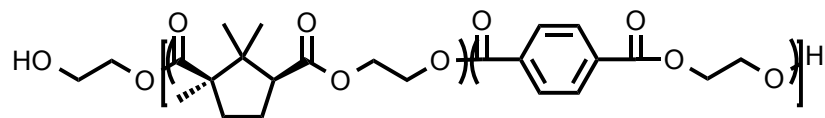

In a 50 mL round bottom flask, 750 mg (2.60 mmol) of bis(2-hydroxyethyl) camphorate were added to 1.54 g (6.06 mmol) of bis(2-hydroxyethyl) terephthalate and 25 mg (2 mol%) of antimony oxide with a magnetic stir bar. The mixture was stirred from 200 to 240 °C under vacuum on a Schlenk line for 7 hours. After that time had elapsed, a viscous light brown polymer was obtained and removed without further purification (1.70 g, 97% isolated yield). <sup>1</sup>H NMR (CDCl<sub>3</sub>): δ 0.77 (br. s., 3 H), 1.19 (br. s., 3 H), 1.22 (br. s., 3 H), 1.50 (m, 1 H), 1.82 (m, 1 H), 2.17 (m, 1 H), 2.53 (m, 1 H), 2.80 (m, 1 H), 4.28 (m, 4 H), 4.42 (m), 4.55 (m), 4.69 (br. s.), 8.10 (m). <sup>13</sup>C NMR (CDCl<sub>3</sub> and TFA-d): δ 22.3, 23.6, 25.4, 33.4, 48.7, 49.2, 54.2, 57.8, 64.2, 65.0, 70.3, 131.2, 134.6, 168.7.

**Synthesis of poly[bis(2-hydroxyethyl) camphorate-co-bis(2-hydroxyethyl) terephthalate] 20% BHEC/80% BHET (Table S2, Entry 9)**

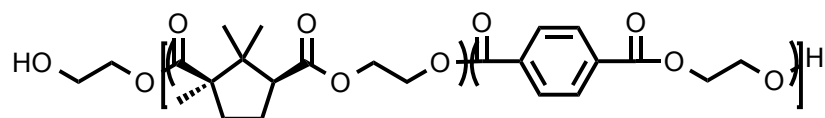

In a 50 mL round bottom flask, 750 mg (2.60 mmol) of bis(2-hydroxyethyl) camphorate were added to 2.65 g (10.43 mmol) of bis(2-hydroxyethyl) terephthalate and 38 mg (1 mol%) of antimony oxide with a magnetic stir bar. The mixture was stirred from 200 to 240 °C under vacuum on a Schlenk line for 7 hours. After that time had elapsed, a viscous light brown polymer was obtained and removed without further purification (2.59 g, 99% isolated yield). <sup>1</sup>H NMR (CDCl<sub>3</sub> and TFA-d): δ 0.77 (br. s., 3 H), 1.19 (s, 3 H), 1.22 (s, 3 H), 1.51 (m, 1 H), 1.81 (m, 1 H), 2.17 (m, 1 H), 2.55 (m, 1 H), 2.82 (m, 1 H), 4.28 (m, 4 H), 4.51 (m), 4.55 (m), 4.69 (br. s.), 8.10 (m). <sup>13</sup>C NMR (CDCl<sub>3</sub> and TFA-d): δ 22.5, 23.7, 26.8, 31.2, 34.8, 66.5, 67.2, 71.7, 132.6, 132.7, 136.0, 170.2.

**Synthesis of poly[bis(2-hydroxyethyl) camphorate-co-bis(2-hydroxyethyl) terephthalate]  
10% BHEC/90% BHET (Table S2, Entry 10)**

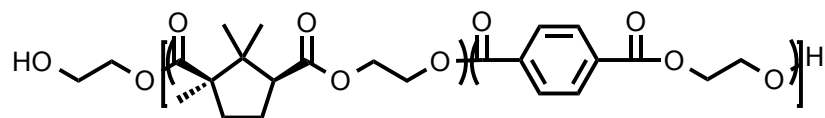

In a 50 mL round bottom flask, 400 mg (1.39 mmol) of bis(2-hydroxyethyl) camphorate were added to 3.17 g (12.48 mmol) of bis(2-hydroxyethyl) terephthalate and 40 mg (1 mol%) of antimony oxide with a magnetic stir bar. The mixture was stirred from 200 to 240 °C under vacuum on a Schlenk line for 7 hours. After that time had elapsed, a viscous light brown polymer was obtained and removed without further purification (2.83 g, 99% yield). <sup>1</sup>H NMR (CDCl<sub>3</sub> and TFA-*d*): δ 0.81 (s), 1.19 (s), 1.23 (s), 1.58 (m), 1.89 (m), 2.17 (m), 2.54 (m), 2.94 (m), 4.12 (s), 4.54 – 4.80 (m, 4 H), 8.13 (m, 4 H). <sup>13</sup>C NMR (CDCl<sub>3</sub> and TFA-*d*): δ 13.4, 43.9, 46.8, 51.9, 66.5, 67.2, 71.7, 132.6, 132.7, 136.0, 170.2.

**Synthesis of poly[bis(2-hydroxyethyl) terephthalate] (PET) (Table S2, Entry 11)**

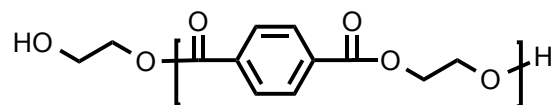

In a 50 mL round bottom flask, 2.00 g (7.87 mmol) of bis(2-hydroxyethyl) terephthalate, 23 mg (1 mol%) of antimony oxide, and a magnetic stir bar were combined. The mixture was stirred from 200 to 240 °C under vacuum on a Schlenk line for 7 hours. After that time had elapsed, a viscous light brown polymer was obtained and removed without further purification (1.73 g, 99% yield). <sup>1</sup>H NMR (CDCl<sub>3</sub> and TFA-*d*): δ 4.83 (s, 4 H), 8.17 (m, 4 H). <sup>13</sup>C NMR (CDCl<sub>3</sub> and TFA-*d*): δ 65.2, 131.3, 134.6, 169.3.

## Summary of Polymerization Data

**Table S1** Polymerization and characterization of polyalkylene camphorates from linear diols (entries 1–6) and camphorate polyesters derived from erythritan (Entry 7) and isosorbide (Entry 8)<sup>a</sup>

| Entry | Polymer from camphoric acid + diol | Catalyst              | Yield (%) | $M_n^b$ (Da) | $M_w^b$ (Da) | $\bar{D}^b$ | $T_g^c$ (°C) | $T_5^d$ (°C) |
|-------|------------------------------------|-----------------------|-----------|--------------|--------------|-------------|--------------|--------------|
| 1     |                                    | $Zn(OAc)_2 + Sb_2O_3$ | 75        | 18,700       | 75,700       | 4.0         | 51           | 331          |
| 2     |                                    | <i>p</i> -TSA         | 84        | 20,200       | 60,800       | 3.0         | 44           | 368          |
| 3     |                                    | <i>p</i> -TSA         | 75        | 7,700        | 22,800       | 3.0         | 38           | 326          |
| 4     |                                    | <i>p</i> -TSA         | 71        | 7,300        | 19,600       | 2.7         | 25           | 322          |
| 5     |                                    | <i>p</i> -TSA         | 73        | 8,300        | 24,500       | 2.9         | −1           | 352          |
| 6     |                                    | <i>p</i> -TSA         | 96        | 8,000        | 35,800       | 4.4         | −16          | 353          |
| 7     |                                    | $Zn(OAc)_2 + Sb_2O_3$ | 73        | 9,000        | 25,000       | 2.8         | 100          | 304          |
| 8     |                                    | <i>p</i> -TSA         | 98        | 6,900        | 42,000       | 6.1         | 125          | 355          |

<sup>a</sup> Polymerization conducted at 180 °C under nitrogen for 16 hours, followed by a temperature ramp over 12 hours to 230 °C under dynamic vacuum. <sup>b</sup> Gel permeation chromatography (GPC) in hexafluoroisopropanol (HFIP) at 40 °C vs polymethylmethacrylate standards. <sup>c</sup> Determined by DSC. <sup>d</sup> Temperature at which 5% mass loss was observed, determined by thermogravimetric analysis (TGA).

**Table S2** Copolymerization of bis(hydroxyethyl) camphorate (BHEC, from camphoric acid) and bis(hydroxyethyl) terephthalate (BHET, from terephthalic acid)<sup>a</sup>

| Entry | BHEC % Feed | BHEC % Incorporation <sup>b</sup> | Yield (%) | $M_n^c$ (Da) | $M_w^c$ (Da) | $\bar{D}^c$ | $T_g^d$ (°C) | $T_m^d$ (°C) | $T_5^e$ (°C) |
|-------|-------------|-----------------------------------|-----------|--------------|--------------|-------------|--------------|--------------|--------------|
| 1     | 100         | 100.0                             | 84        | 23,800       | 54,400       | 2.3         | 41           | n.o.         | 343          |
| 2     | 90          | 82.9                              | 64        | 13,300       | 34,100       | 2.6         | 42           | n.o.         | 335          |
| 3     | 80          | 65.8                              | 74        | 14,600       | 42,700       | 2.9         | 50           | n.o.         | 344          |
| 4     | 70          | 52.7                              | 86        | 17,300       | 56,600       | 3.3         | 46           | n.o.         | 344          |
| 5     | 60          | 34.0                              | 83        | 19,500       | 54,600       | 2.8         | 52           | n.o.         | 342          |
| 6     | 50          | 31.6                              | 95        | 21,300       | 59,200       | 2.7         | 54           | n.o.         | 345          |
| 7     | 40          | 22.2                              | 90        | 14,800       | 38,300       | 2.6         | 54           | n.o.         | 351          |
| 8     | 30          | 19.8                              | 97        | 13,700       | 33,100       | 2.4         | 59           | 180          | 352          |
| 9     | 20          | 12.3                              | 99        | 16,800       | 42,200       | 2.5         | 64           | 193          | 348          |
| 10    | 10          | 7.6                               | 99        | 22,300       | 55,900       | 2.5         | 66           | 209          | 361          |
| 11    | 0           | 0.0                               | 99        | 19,800       | 55,100       | 2.8         | 71           | 229          | 371          |

<sup>a</sup> Polymerization conducted from 190 to 230 °C under dynamic vacuum with antimony oxide as a catalyst ( $Sb_2O_3$ , 1–2 mol%). <sup>b</sup> BHEC and BHET % incorporation determined by <sup>1</sup>H NMR by integrating the 1-methyl group of the camphoric acid ring (0.77 ppm) versus the aromatic protons (near 8.1 ppm). <sup>c</sup> Gel Permeation Chromatography (GPC) in hexafluoroisopropanol (HFIP) at 40 °C vs polymethylmethacrylate standards.

<sup>d</sup> Determined by DSC; n.o. = not observed. <sup>e</sup> Temperature at which 5% mass loss was observed under nitrogen, determined by TGA.

**Table S3** Summary of GPC results for polyalkylene camphorates with longer diols ( $n = 3,4,5$ ) made via the dual catalyst technique<sup>a</sup>

| Entry | Polymers                                                                          | Catalysts                                              | $M_n^b$ (Da) | $M_w^b$ (Da) | $\mathcal{D}^b$ |
|-------|-----------------------------------------------------------------------------------|--------------------------------------------------------|--------------|--------------|-----------------|
| 1     | 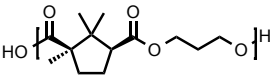 | Zn(OAc) <sub>2</sub><br>Sb <sub>2</sub> O <sub>3</sub> | 4,200        | 13,600       | 3.2             |
| 2     |  | Zn(OAc) <sub>2</sub><br>Sb <sub>2</sub> O <sub>3</sub> | 4,600        | 16,700       | 3.6             |
| 3     |  | Zn(OAc) <sub>2</sub><br>Sb <sub>2</sub> O <sub>3</sub> | 2,800        | 7,200        | 2.6             |

<sup>a</sup> Polymerizations conducted at 180 °C under nitrogen for 16 hours, followed by a temperature ramp over 12 hours to 230 °C under dynamic vacuum. Catalysts: Zn(OAc)<sub>2</sub> (2 mol%) and Sb<sub>2</sub>O<sub>3</sub> (1 mol%, added after first stage) for each entry. <sup>b</sup> Gel Permeation Chromatography (GPC) in hexafluoroisopropanol (HFIP) at 40 °C vs polymethylmethacrylate standards.



## Gel Permeation Chromatography (GPC) Chromatograms

### Molecular Weight Averages

| Peak   | Mp    | Mn    | Mw    | Mz      | Mz+1     | Mv      | PD   |
|--------|-------|-------|-------|---------|----------|---------|------|
| Peak 1 | 33423 | 18734 | 75686 | 2595587 | 43207013 | 1178641 | 4.04 |

### Peak information

|                   | Start (mins) | End (mins) |
|-------------------|--------------|------------|
| Baseline region 1 | 6.36         | 7.95       |
| Baseline region 2 | 32.68        | 34.77      |
| Peak 1            | 10.77        | 21.54      |

| Peak   | Trace | Peak Max RT (mins) | Peak Area (mV.s) | Peak Height (mV) |
|--------|-------|--------------------|------------------|------------------|
| Peak 1 | RI    | 17.88              | 5571988.311      | 24698.669        |

### Chromatogram

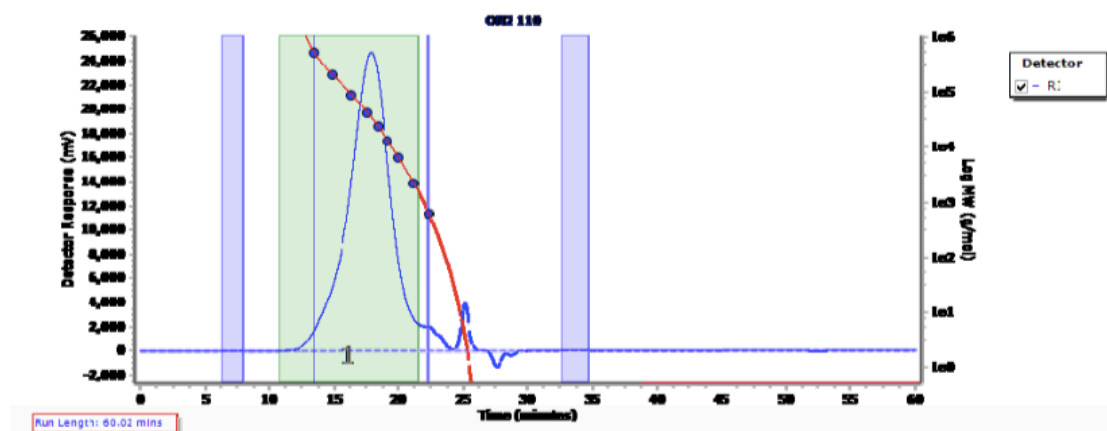

Figure S1. GPC chromatogram for polyethylene camphorate (Table S1, Entry 1)

### Molecular Weight Averages

| Peak   | Mp    | Mn    | Mw    | Mz     | Mz+1   | Mv     | PD    |
|--------|-------|-------|-------|--------|--------|--------|-------|
| Peak 1 | 34549 | 20182 | 60835 | 141591 | 238487 | 128204 | 3.014 |

### Peak information

|                   | Start (mins) | End (mins) |
|-------------------|--------------|------------|
| Baseline region 1 | 2.89         | 5.71       |
| Baseline region 2 | 31.52        | 34.99      |
| Peak 1            | 13.52        | 21.33      |

| Peak   | Trace | Peak Max RT (mins) | Peak Area (mV.s) | Peak Height (mV) |
|--------|-------|--------------------|------------------|------------------|
| Peak 1 | RI    | 17.83              | 8914449.939      | 41052.699        |

### Chromatogram

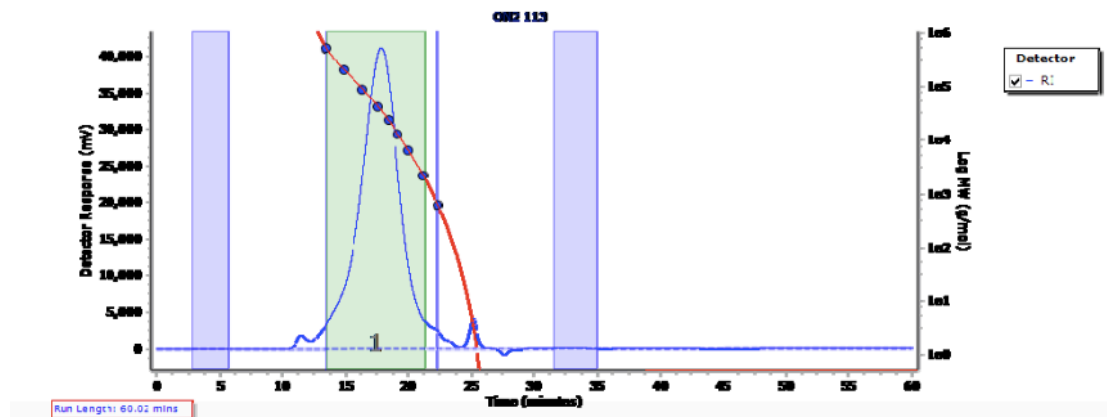

Figure S2. GPC chromatogram for polyethylene camphorate [dual catalyst] (Table S1, Entry 2)

#### Molecular Weight Averages

| Peak   | Mp    | Mn   | Mw    | Mz    | Mz+1  | Mv    | PD    |
|--------|-------|------|-------|-------|-------|-------|-------|
| Peak 1 | 15303 | 7672 | 22836 | 45614 | 68942 | 42202 | 2.977 |

#### Peak information

|                   | Start (mins) | End (mins) |
|-------------------|--------------|------------|
| Baseline region 1 | 2.53         | 4.84       |
| Baseline region 2 | 39.54        | 42.94      |
| Peak 1            | 15.62        | 22.84      |

| Peak   | Trace | Peak Max RT (mins) | Peak Area (mV.s) | Peak Height (mV) |
|--------|-------|--------------------|------------------|------------------|
| Peak 1 | RI    | 18.91              | 9565854.948      | 51966.887        |

#### Chromatogram

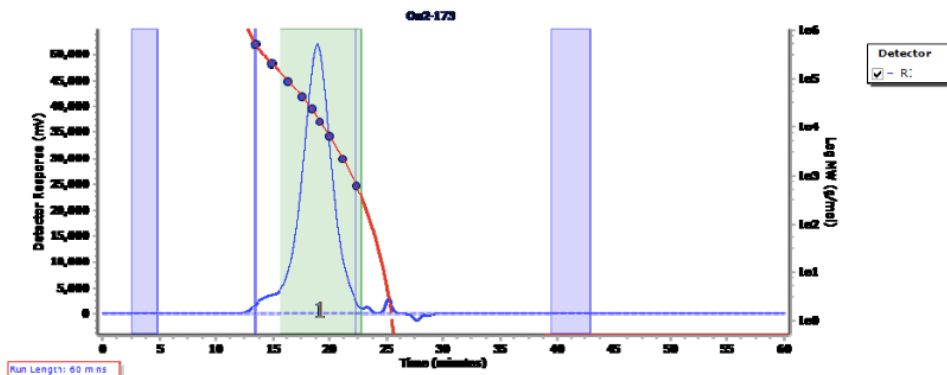

Figure S3. GPC chromatogram for polypropylene camphorate (Table S1, Entry 3)

#### Molecular Weight Averages

| Peak   | Mp    | Mn   | Mw    | Mz    | Mz+1  | Mv    | PD    |
|--------|-------|------|-------|-------|-------|-------|-------|
| Peak 1 | 15966 | 7276 | 19591 | 36942 | 61369 | 34049 | 2.693 |

#### Peak information

|                   | Start (mins) | End (mins) |
|-------------------|--------------|------------|
| Baseline region 1 | 7.01         | 9.83       |
| Baseline region 2 | 40.78        | 44.61      |
| Peak 1            | 14.75        | 22.56      |

| Peak   | Trace | Peak Max RT (mins) | Peak Area (mV.s) | Peak Height (mV) |
|--------|-------|--------------------|------------------|------------------|
| Peak 1 | RI    | 18.86              | 3800695.504      | 22274.507        |

#### Chromatogram

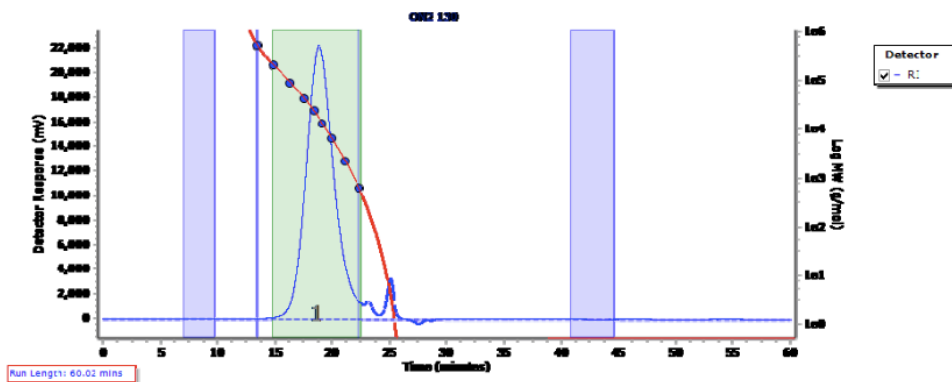

Figure S4. GPC chromatogram for polybutylene camphorate (Table S1, Entry 4)

# Molecular Weight Averages

| Peak   | Mp     | Mn     | Mw     | Mz     | Mz+1    | Mv     | PD    |
|--------|--------|--------|--------|--------|---------|--------|-------|
| Peak 1 | 337533 | 394744 | 549997 | 895012 | 1417430 | 828174 | 1.393 |
| Peak 2 | 19625  | 8322   | 24481  | 43854  | 62744   | 41102  | 2.942 |

# Peak information

|                   | Start (mins) | End (mins) |
|-------------------|--------------|------------|
| Baseline region 1 | 3.61         | 5.78       |
| Baseline region 2 | 39.19        | 43.02      |
| Peak 1            | 12.07        | 14.75      |
| Peak 2            | 15.62        | 22.70      |

| Peak   | Trace | Peak Max RT (mins) | Peak Area (mV.s) | Peak Height (mV) |
|--------|-------|--------------------|------------------|------------------|
| Peak 1 | RI    | 14.02              | 132513.496       | 1220.053         |
| Peak 2 | RI    | 18.60              | 5805399.642      | 32114.002        |

# Chromatogram

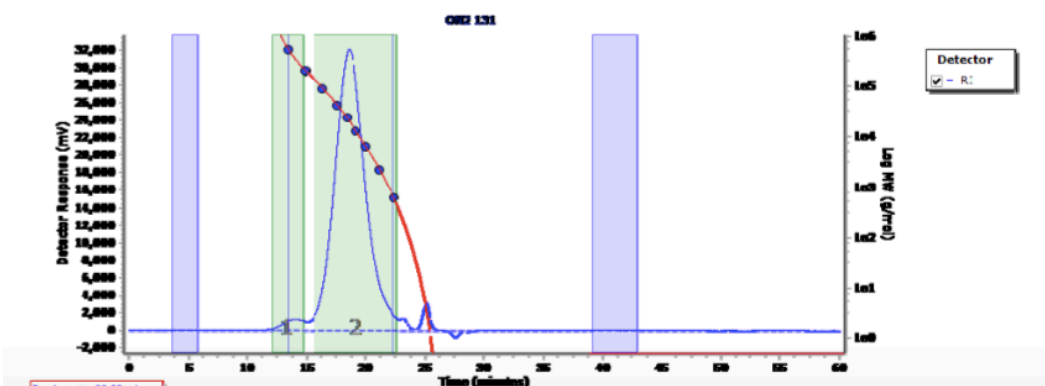

Figure S5. GPC chromatogram for polypentylene camphorate (Table S1, Entry 5)

# Molecular Weight Averages

| Peak   | Mp    | Mn   | Mw    | Mz     | Mz+1   | Mv     | PD    |
|--------|-------|------|-------|--------|--------|--------|-------|
| Peak 1 | 18300 | 8039 | 35839 | 127228 | 312759 | 107375 | 4.458 |

# Peak information

|                   | Start (mins) | End (mins) |
|-------------------|--------------|------------|
| Baseline region 1 | 2.82         | 5.64       |
| Baseline region 2 | 41.21        | 45.04      |
| Peak 1            | 12.67        | 22.85      |

| Peak   | Trace | Peak Max RT (mins) | Peak Area (mV.s) | Peak Height (mV) |
|--------|-------|--------------------|------------------|------------------|
| Peak 1 | RI    | 18.69              | 12027287.363     | 60340.880        |

# Chromatogram

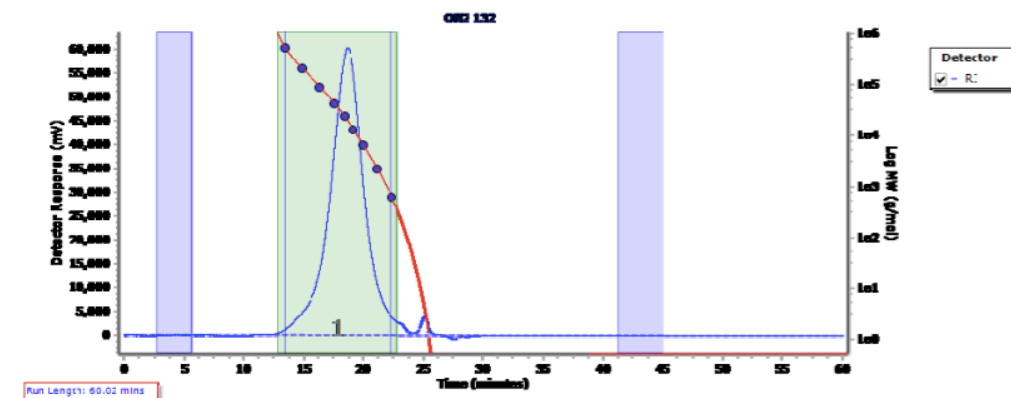

Figure S6. GPC chromatogram for polyhexylene camphorate (Table S1, Entry 6)

# Molecular Weight Averages

| Peak   | Mp    | Mn   | Mw    | Mz    | Mz+1   | Mv    | PD   |
|--------|-------|------|-------|-------|--------|-------|------|
| Peak 1 | 11281 | 8955 | 24980 | 61234 | 100475 | 55561 | 2.79 |

# Peak information

|                   | Start (mins) | End (mins) |
|-------------------|--------------|------------|
| Baseline region 1 | 10.63        | 10.96      |
| Baseline region 2 | 24.37        | 25.32      |
| Peak 1            | 11.07        | 16.78      |

| Peak   | Trace | Peak Max RT (mins) | Peak Area (mV.s) | Peak Height (mV) |
|--------|-------|--------------------|------------------|------------------|
| Peak 1 | RI    | 14.49              | 872567.737       | 4674.660         |

# Chromatogram

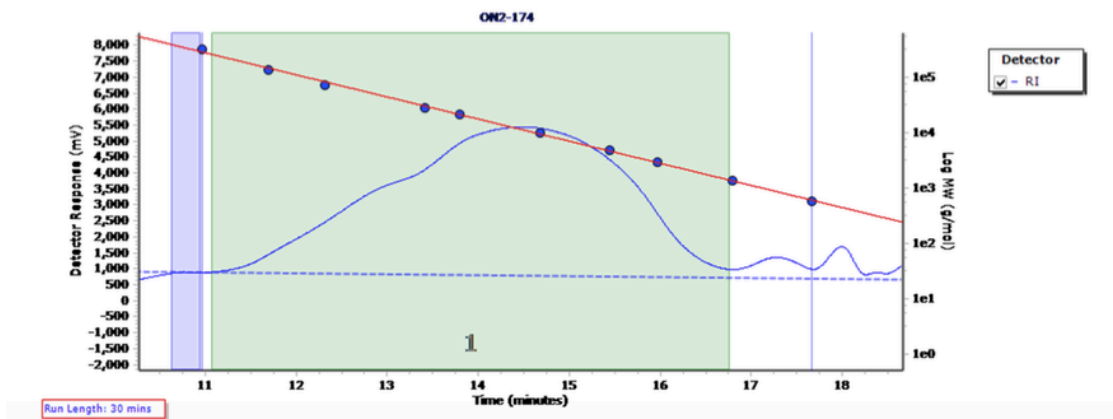

Figure S7. GPC chromatogram for polyerythritan camphorate (Table S1, Entry 7)

# Molecular Weight Averages

| Peak   | Mp    | Mn   | Mw    | Mz     | Mz+1   | Mv         | PD    |
|--------|-------|------|-------|--------|--------|------------|-------|
| Peak 1 | 0     | 0    | 0     | 0      | 0      | 1294691009 | 0     |
| Peak 2 | 12820 | 6895 | 41985 | 284184 | 792958 | 225902     | 6.089 |

# Peak information

|                   | Start (mins) | End (mins) |
|-------------------|--------------|------------|
| Baseline region 1 | 2.46         | 4.89       |
| Baseline region 2 | 29.36        | 29.90      |
| Peak 1            | 10.82        | 12.40      |
| Peak 2            | 12.90        | 22.90      |

| Peak   | Trace | Peak Max RT (mins) | Peak Area (mV.s) | Peak Height (mV) |
|--------|-------|--------------------|------------------|------------------|
| Peak 1 | RI    | 11.47              | 94872.818        | 1590.176         |
| Peak 2 | RI    | 19.27              | 5906724.619      | 25914.309        |

# Chromatogram

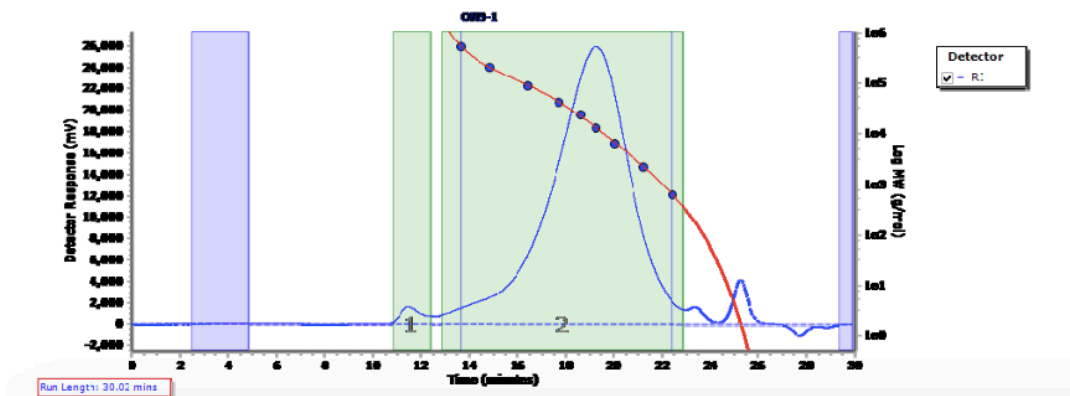

Figure S8. GPC chromatogram for polyisobutide camphorate (Table S1, Entry 8)

#### Molecular Weight Averages

| Peak   | Mp    | Mn    | Mw    | Mz    | Mz+1   | Mv    | PD    |
|--------|-------|-------|-------|-------|--------|-------|-------|
| Peak 1 | 43026 | 23774 | 54425 | 95970 | 152313 | 89186 | 2.289 |

#### Peak information

|                   | Start (mins) | End (mins) |
|-------------------|--------------|------------|
| Baseline region 1 | 1.66         | 6.94       |
| Baseline region 2 | 38.61        | 43.09      |
| Peak 1            | 13.16        | 21.18      |

| Peak   | Trace | Peak Max RT (mins) | Peak Area (mV.s) | Peak Height (mV) |
|--------|-------|--------------------|------------------|------------------|
| Peak 1 | RI    | 17.52              | 6922030.894      | 36419.349        |

#### Chromatogram

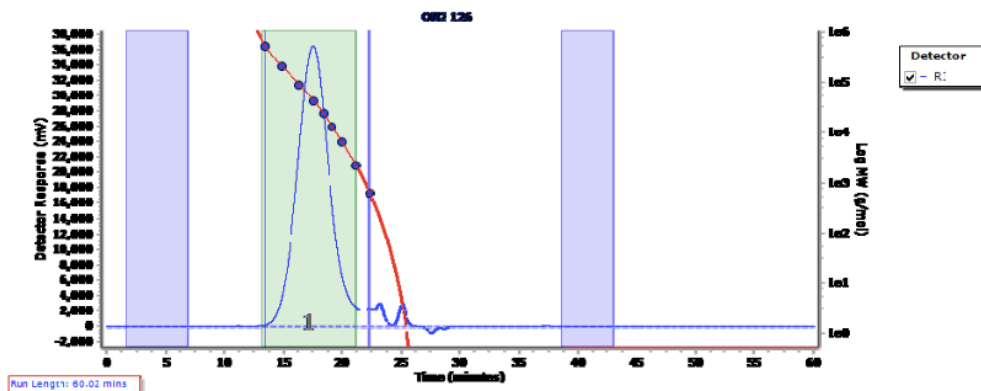

Figure S9. GPC chromatogram for polyBHEC (Table S2, Entry 1)

#### Molecular Weight Averages

| Peak   | Mp    | Mn    | Mw    | Mz    | Mz+1  | Mv    | PD    |
|--------|-------|-------|-------|-------|-------|-------|-------|
| Peak 1 | 27845 | 13291 | 34087 | 57652 | 81274 | 54303 | 2.565 |

#### Peak information

|                   | Start (mins) | End (mins) |
|-------------------|--------------|------------|
| Baseline region 1 | 1.37         | 3.13       |
| Baseline region 2 | 28.13        | 29.79      |
| Peak 1            | 14.70        | 22.08      |

| Peak   | Trace | Peak Max RT (mins) | Peak Area (mV.s) | Peak Height (mV) |
|--------|-------|--------------------|------------------|------------------|
| Peak 1 | RI    | 18.30              | 10117318.130     | 56556.364        |

#### Chromatogram

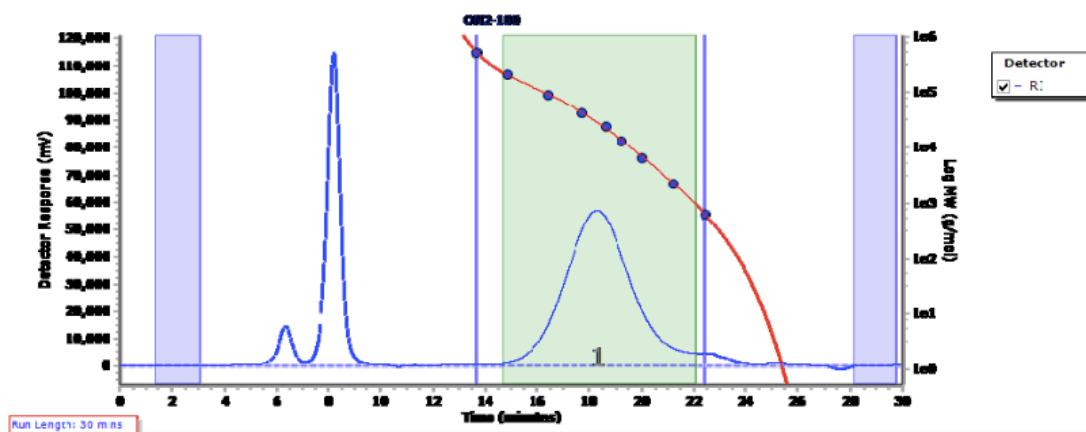

Figure S10. GPC chromatogram for poly(BHEC/BHET) with 90% BHEC (Table S2, Entry 2)

# Molecular Weight Averages

| Peak   | Mp    | Mn    | Mw    | Mz    | Mz+1   | Mv    | PD   |
|--------|-------|-------|-------|-------|--------|-------|------|
| Peak 1 | 30227 | 14578 | 42709 | 99183 | 240605 | 87116 | 2.93 |

# Peak information

|                   | Start (mins) | End (mins) |
|-------------------|--------------|------------|
| Baseline region 1 | 1.01         | 2.75       |
| Baseline region 2 | 39.76        | 43.52      |
| Peak 1            | 12.65        | 21.98      |

| Peak   | Trace | Peak Max RT (mins) | Peak Area (mV.s) | Peak Height (mV) |
|--------|-------|--------------------|------------------|------------------|
| Peak 1 | RI    | 18.02              | 4895734.712      | 25004.820        |

# Chromatogram

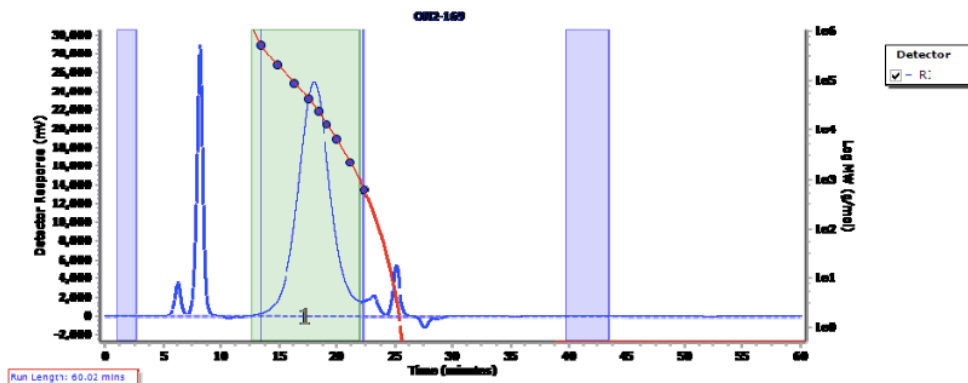

Figure S11. GPC chromatogram for poly(BHEC/BHET) with 80% BHEC (Table S2, Entry 3)

# Molecular Weight Averages

| Peak   | Mp    | Mn    | Mw    | Mz     | Mz+1   | Mv     | PD    |
|--------|-------|-------|-------|--------|--------|--------|-------|
| Peak 1 | 34876 | 17297 | 56613 | 146491 | 377238 | 126820 | 3.273 |

# Peak information

|                   | Start (mins) | End (mins) |
|-------------------|--------------|------------|
| Baseline region 1 | 2.67         | 7.16       |
| Baseline region 2 | 42.08        | 54.51      |
| Peak 1            | 12.36        | 21.98      |

| Peak   | Trace | Peak Max RT (mins) | Peak Area (mV.s) | Peak Height (mV) |
|--------|-------|--------------------|------------------|------------------|
| Peak 1 | RI    | 17.82              | 7595873.842      | 36140.531        |

# Chromatogram

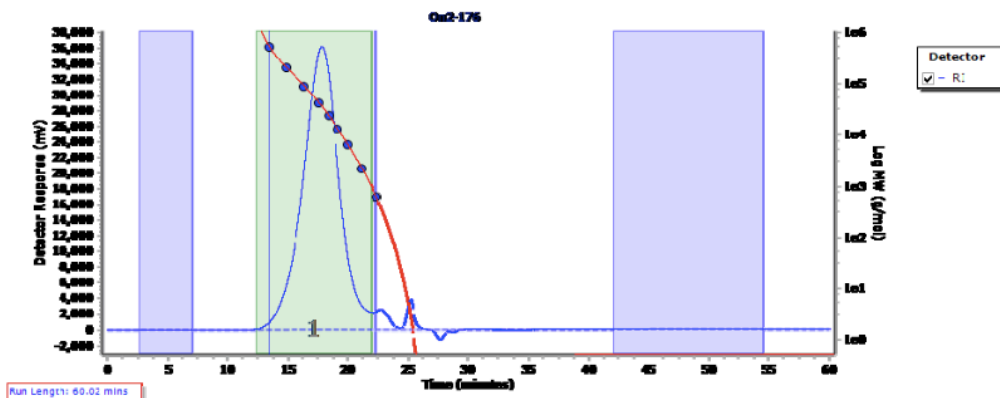

Figure S12. GPC chromatogram for poly(BHEC/BHET) with 70% BHEC (Table S2, Entry 4)

# Molecular Weight Averages

| Peak   | Mp    | Mn    | Mw    | Mz     | Mz+1   | Mv    | PD    |
|--------|-------|-------|-------|--------|--------|-------|-------|
| Peak 1 | 43319 | 19537 | 54576 | 100190 | 161121 | 92795 | 2.793 |

## Peak information

|                   | Start (mins) | End (mins) |
|-------------------|--------------|------------|
| Baseline region 1 | 3.04         | 6.65       |
| Baseline region 2 | 38.03        | 49.16      |
| Peak 1            | 13.23        | 21.98      |

| Peak   | Trace | Peak Max RT (mins) | Peak Area (mV.s) | Peak Height (mV) |
|--------|-------|--------------------|------------------|------------------|
| Peak 1 | RI    | 17.50              | 3557078.626      | 17832.677        |

## Chromatogram

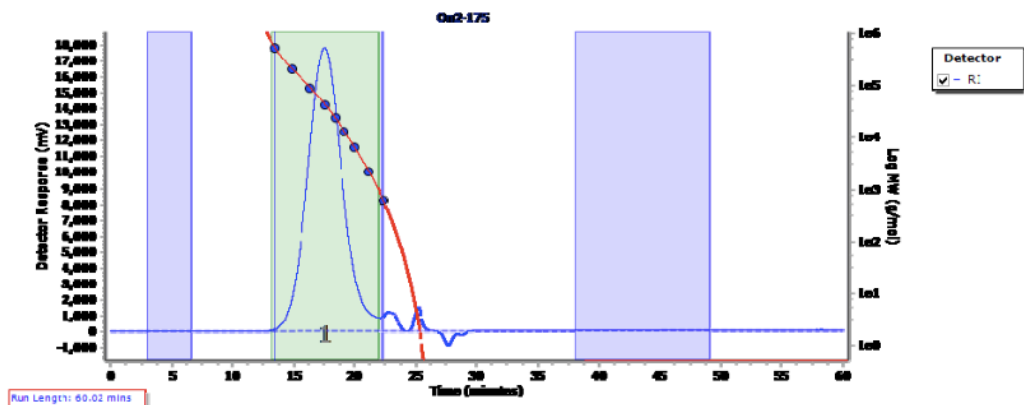

Figure S13. GPC chromatogram for poly(BHEC/BHET) with 60% BHEC (Table S2, Entry 5)

# Molecular Weight Averages

| Peak   | Mp    | Mn    | Mw    | Mz     | Mz+1   | Mv     | PD    |
|--------|-------|-------|-------|--------|--------|--------|-------|
| Peak 1 | 44206 | 21356 | 59178 | 115033 | 205251 | 105161 | 2.771 |

## Peak information

|                   | Start (mins) | End (mins) |
|-------------------|--------------|------------|
| Baseline region 1 | 2.24         | 5.78       |
| Baseline region 2 | 41.35        | 52.92      |
| Peak 1            | 12.87        | 21.83      |

| Peak   | Trace | Peak Max RT (mins) | Peak Area (mV.s) | Peak Height (mV) |
|--------|-------|--------------------|------------------|------------------|
| Peak 1 | RI    | 17.47              | 5897785.799      | 29334.630        |

## Chromatogram

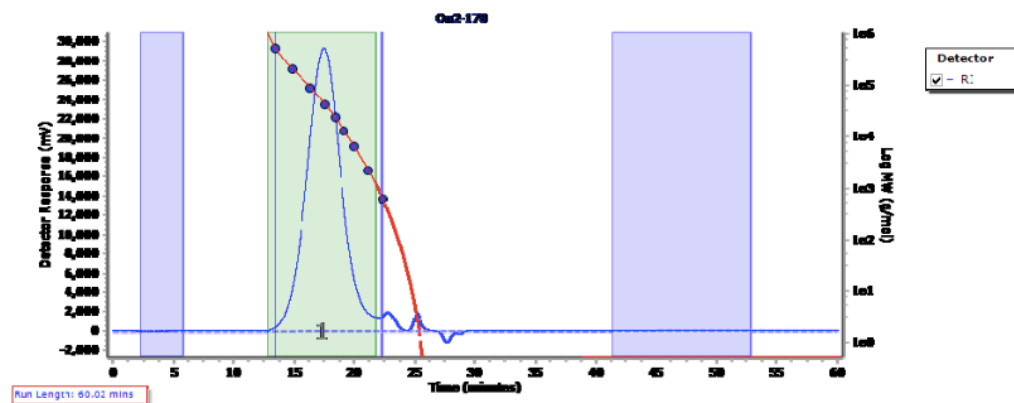

Figure S14. GPC chromatogram for poly(BHEC/BHET) with 50% BHEC (Table S2, Entry 6)

# Molecular Weight Averages

| Peak   | Mp    | Mn    | Mw    | Mz    | Mz+1   | Mv    | PD    |
|--------|-------|-------|-------|-------|--------|-------|-------|
| Peak 1 | 30300 | 14830 | 38318 | 67857 | 103649 | 63264 | 2.584 |

# Peak information

|                   | Start (mins) | End (mins) |
|-------------------|--------------|------------|
| Baseline region 1 | 4.27         | 8.10       |
| Baseline region 2 | 39.19        | 47.14      |
| Peak 1            | 13.59        | 22.05      |

| Peak   | Trace | Peak Max RT (mins) | Peak Area (mV.s) | Peak Height (mV) |
|--------|-------|--------------------|------------------|------------------|
| Peak 1 | RI    | 18.02              | 8337394.187      | 45599.149        |

# Chromatogram

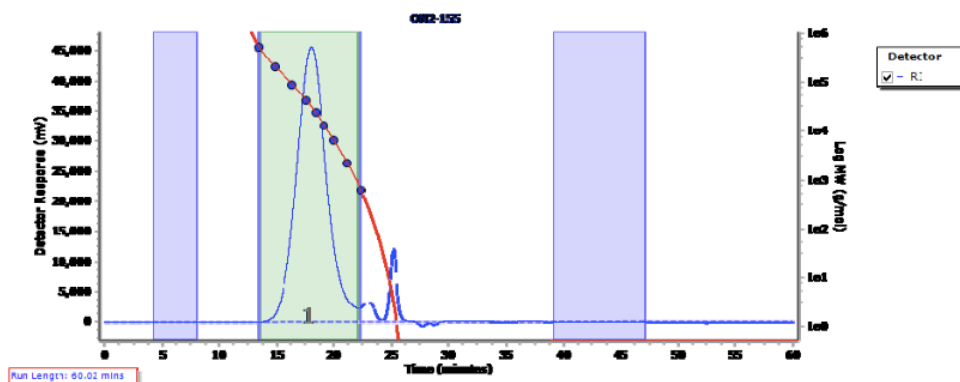

**Figure S15.** GPC chromatogram for poly(BHEC/BHET) with 40% BHEC (Table S2, Entry 7)

# Molecular Weight Averages

| Peak   | Mp    | Mn    | Mw    | Mz    | Mz+1  | Mv    | PD    |
|--------|-------|-------|-------|-------|-------|-------|-------|
| Peak 1 | 25090 | 13713 | 33142 | 59650 | 93066 | 55415 | 2.417 |

# Peak information

|                   | Start (mins) | End (mins) |
|-------------------|--------------|------------|
| Baseline region 1 | 3.69         | 7.09       |
| Baseline region 2 | 36.94        | 48.22      |
| Peak 1            | 13.66        | 21.91      |

| Peak   | Trace | Peak Max RT (mins) | Peak Area (mV.s) | Peak Height (mV) |
|--------|-------|--------------------|------------------|------------------|
| Peak 1 | RI    | 18.27              | 12231059.784     | 69204.853        |

# Chromatogram

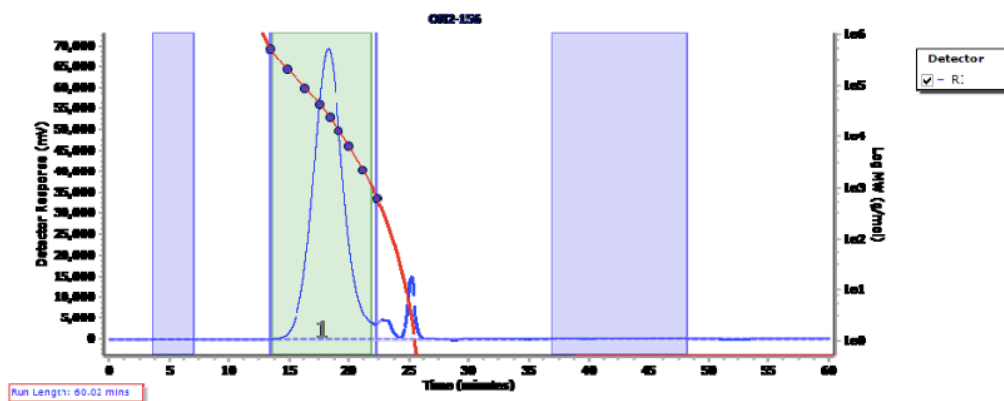

**Figure S16.** GPC chromatogram for poly(BHEC/BHET) with 30% BHEC (Table S2, Entry 8)



# Molecular Weight Averages

| Peak   | Mp    | Mn    | Mw    | Mz    | Mz+1   | Mv    | PD    |
|--------|-------|-------|-------|-------|--------|-------|-------|
| Peak 1 | 33423 | 16838 | 42191 | 73445 | 110317 | 68629 | 2.506 |

# Peak information

|                   | Start (mins) | End (mins) |
|-------------------|--------------|------------|
| Baseline region 1 | 4.70         | 9.18       |
| Baseline region 2 | 42.44        | 50.68      |
| Peak 1            | 13.74        | 21.98      |

| Peak   | Trace | Peak Max RT (mins) | Peak Area (mV.s) | Peak Height (mV) |
|--------|-------|--------------------|------------------|------------------|
| Peak 1 | RI    | 17.88              | 8484466.411      | 46280.031        |

# Chromatogram

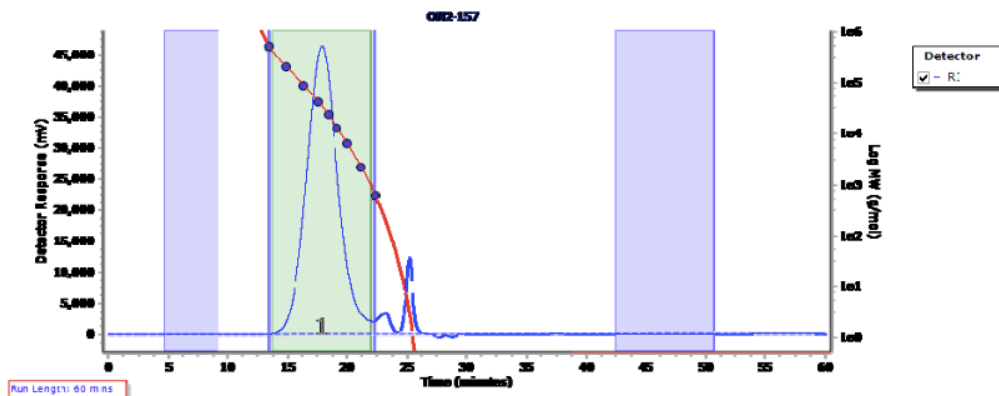

Figure S17. GPC chromatogram for poly(BHEC/BHET) with 20% BHEC (Table S2, Entry 9)

# Molecular Weight Averages

| Peak   | Mp    | Mn    | Mw    | Mz     | Mz+1   | Mv    | PD    |
|--------|-------|-------|-------|--------|--------|-------|-------|
| Peak 1 | 41776 | 22298 | 55952 | 101992 | 168149 | 94243 | 2.509 |

# Peak information

|                   | Start (mins) | End (mins) |
|-------------------|--------------|------------|
| Baseline region 1 | 2.24         | 5.64       |
| Baseline region 2 | 36.65        | 42.66      |
| Peak 1            | 13.09        | 21.83      |

| Peak   | Trace | Peak Max RT (mins) | Peak Area (mV.s) | Peak Height (mV) |
|--------|-------|--------------------|------------------|------------------|
| Peak 1 | RI    | 17.56              | 9689316.564      | 50632.024        |

# Chromatogram

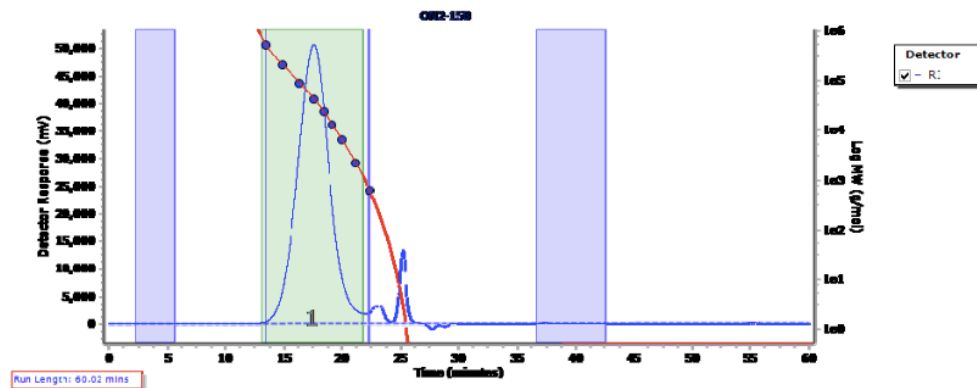

Figure S18. GPC chromatogram for poly(BHEC/BHET) with 10% BHEC (Table S2, Entry 10)

#### Molecular Weight Averages

| Peak   | Mp    | Mn    | Mw    | Mz     | Mz+1   | Mv    | PD   |
|--------|-------|-------|-------|--------|--------|-------|------|
| Peak 1 | 44531 | 19765 | 55145 | 100546 | 174037 | 92724 | 2.79 |

#### Peak information

|                   | Start (mins) | End (mins) |
|-------------------|--------------|------------|
| Baseline region 1 | 2.71         | 6.47       |
| Baseline region 2 | 28.79        | 29.86      |
| Peak 1            | 13.36        | 22.08      |

| Peak   | Trace | Peak Max RT (mins) | Peak Area (mV.s) | Peak Height (mV) |
|--------|-------|--------------------|------------------|------------------|
| Peak 1 | RI    | 17.63              | 7109421.929      | 35459.524        |

#### Chromatogram

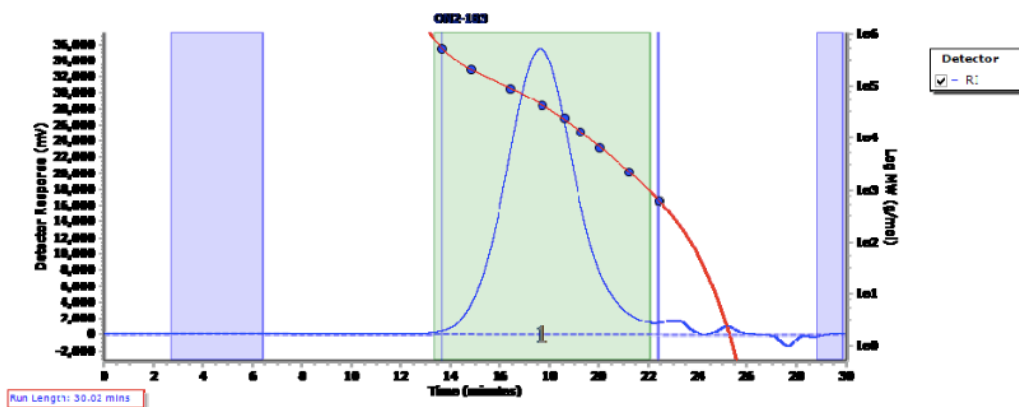

**Figure S19.** GPC chromatogram for polyBHET (Table S2, Entry 11)

#### Molecular Weight Averages

| Peak   | Mp   | Mn   | Mw    | Mz    | Mz+1  | Mv    | PD    |
|--------|------|------|-------|-------|-------|-------|-------|
| Peak 1 | 9979 | 4245 | 13608 | 28968 | 49339 | 26415 | 3.206 |

#### Peak information

|                   | Start (mins) | End (mins) |
|-------------------|--------------|------------|
| Baseline region 1 | 1.59         | 2.75       |
| Baseline region 2 | 33.47        | 40.05      |
| Peak 1            | 15.04        | 22.92      |

| Peak   | Trace | Peak Max RT (mins) | Peak Area (mV.s) | Peak Height (mV) |
|--------|-------|--------------------|------------------|------------------|
| Peak 1 | RI    | 19.43              | 6137230.888      | 34443.734        |

#### Chromatogram

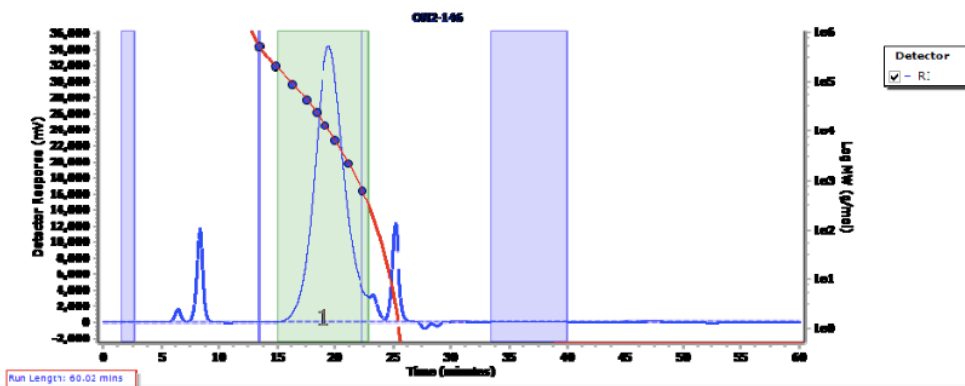

**Figure S20.** GPC chromatogram for polypropylene camphorate [dual catalyst] (Table S3, Entry 1)

## Molecular Weight Averages

| Peak   | Mp    | Mn   | Mw    | Mz    | Mz+1  | Mv    | PD    |
|--------|-------|------|-------|-------|-------|-------|-------|
| Peak 1 | 11491 | 4631 | 16739 | 39241 | 72781 | 35276 | 3.615 |

## Peak information

|                   | Start (mins) | End (mins) |
|-------------------|--------------|------------|
| Baseline region 1 | 5.13         | 7.30       |
| Baseline region 2 | 36.29        | 44.97      |
| Peak 1            | 14.31        | 22.92      |

| Peak   | Trace | Peak Max RT (mins) | Peak Area (mV.s) | Peak Height (mV) |
|--------|-------|--------------------|------------------|------------------|
| Peak 1 | RI    | 19.26              | 6144430.639      | 32802.061        |

## Chromatogram

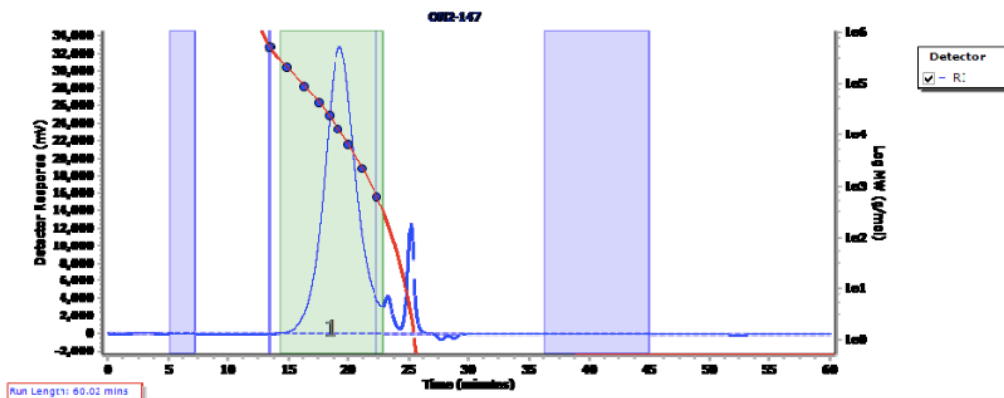

**Figure S21.** GPC chromatogram for polybutylene camphorate [dual catalyst] (Table S3, Entry 2)

## Molecular Weight Averages

| Peak   | Mp   | Mn   | Mw   | Mz    | Mz+1  | Mv    | PD    |
|--------|------|------|------|-------|-------|-------|-------|
| Peak 1 | 5933 | 2808 | 7240 | 13713 | 21009 | 12725 | 2.578 |

## Peak information

|                   | Start (mins) | End (mins) |
|-------------------|--------------|------------|
| Baseline region 1 | 4.12         | 7.52       |
| Baseline region 2 | 36.51        | 42.65      |
| Peak 1            | 16.99        | 22.77      |

| Peak   | Trace | Peak Max RT (mins) | Peak Area (mV.s) | Peak Height (mV) |
|--------|-------|--------------------|------------------|------------------|
| Peak 1 | RI    | 20.04              | 5640827.040      | 34344.683        |

## Chromatogram

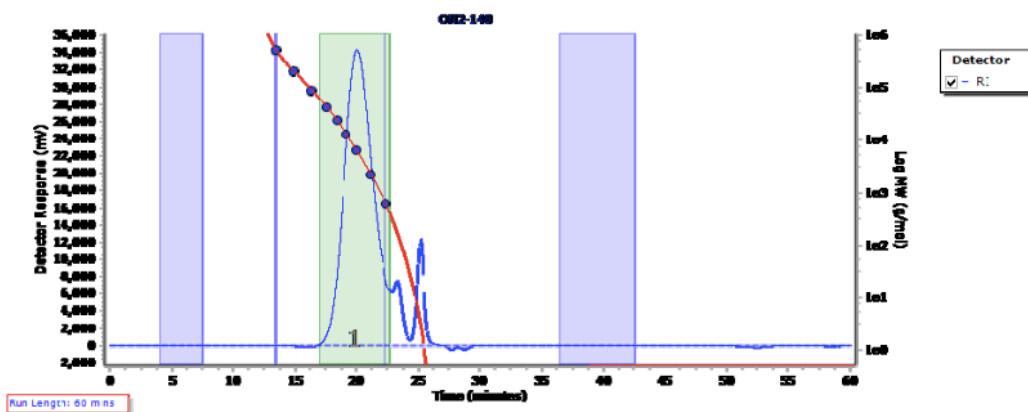

**Figure S22.** GPC chromatogram for polypentylene camphorate [dual catalyst] (Table S3, Entry 3)

### Differential Scanning Calorimetry (DSC) Thermograms

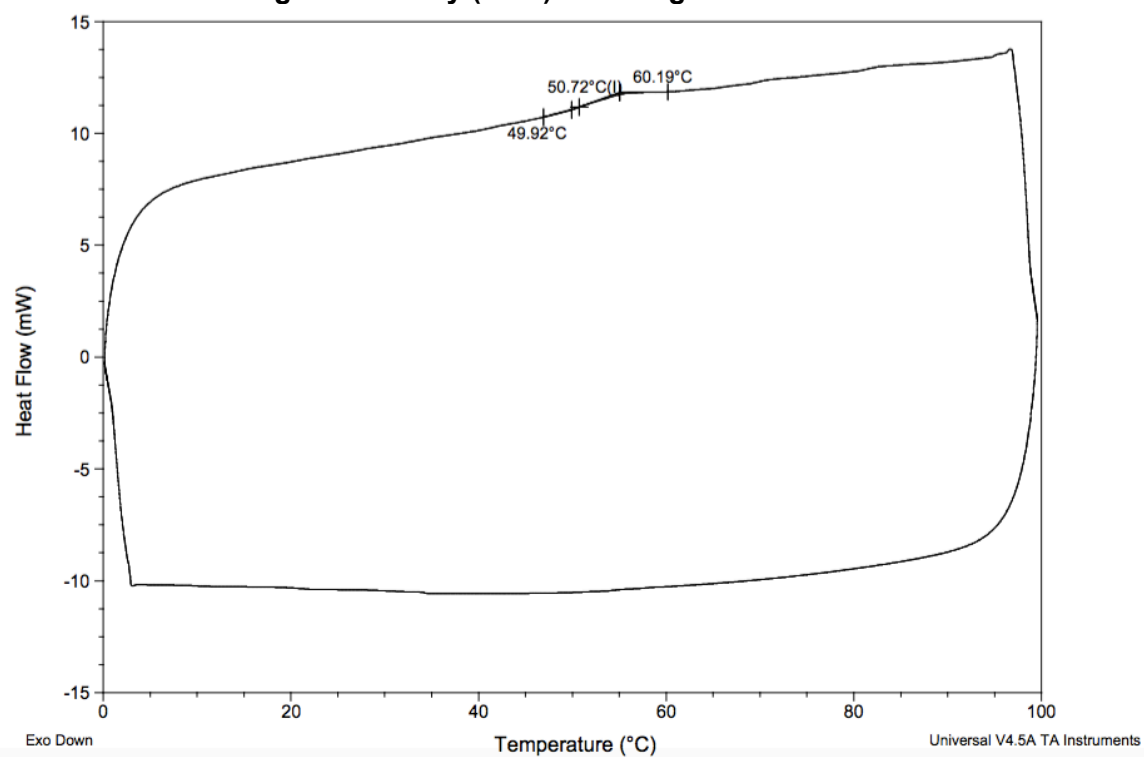

**Figure S23.** DSC thermogram for polyethylene camphorate (Table S1, Entry 1)

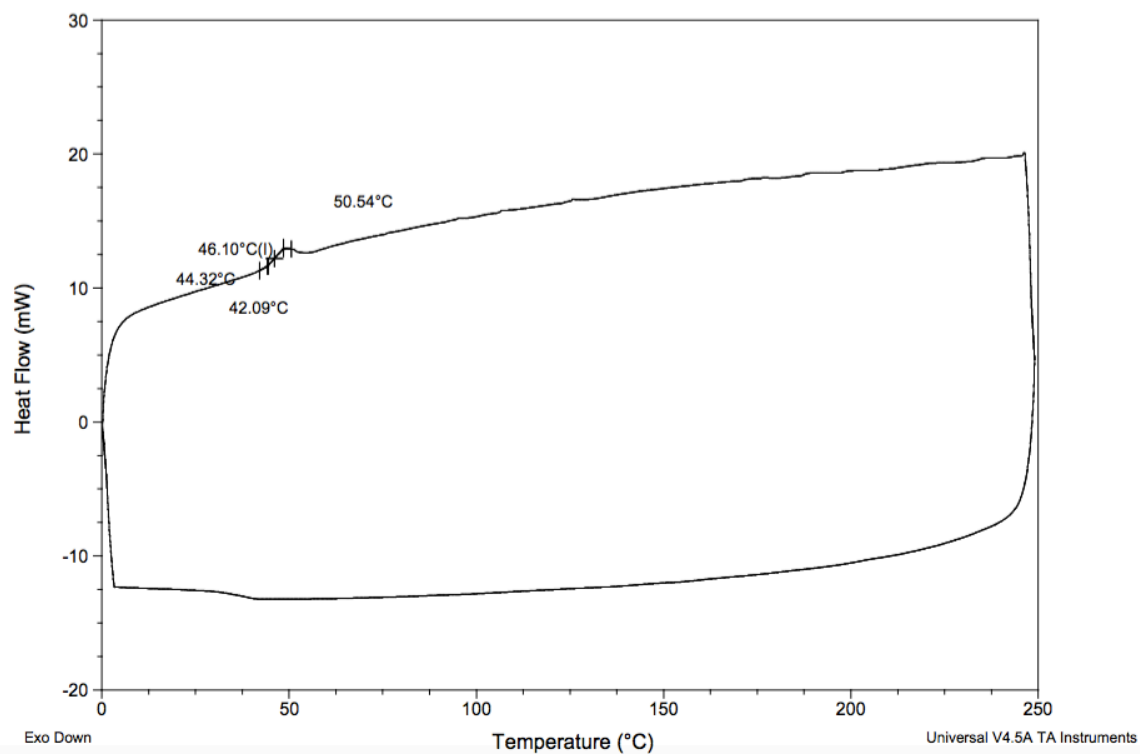

**Figure S24.** DSC thermogram for polyethylene camphorate [dual catalyst] (Table S1, Entry 2)

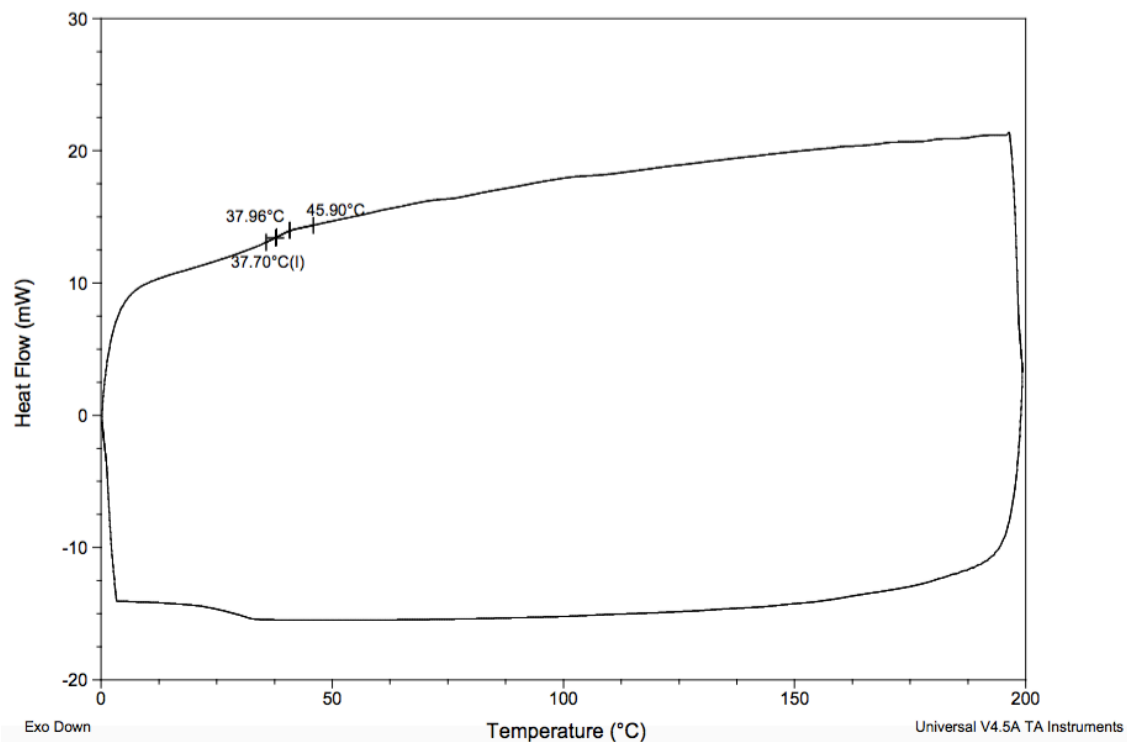

**Figure S25.** DSC thermogram for polypropylene camphorate (Table S1, Entry 3)

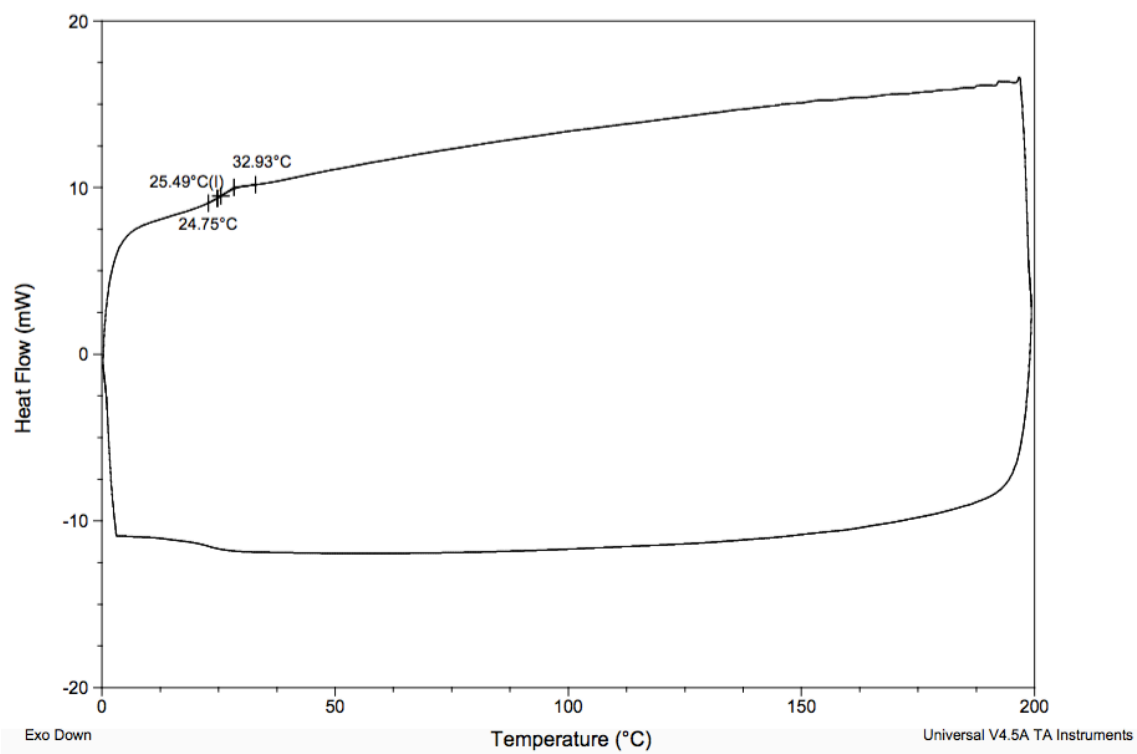

**Figure S26.** DSC thermogram for polybutylene camphorate (Table S1, Entry 4)

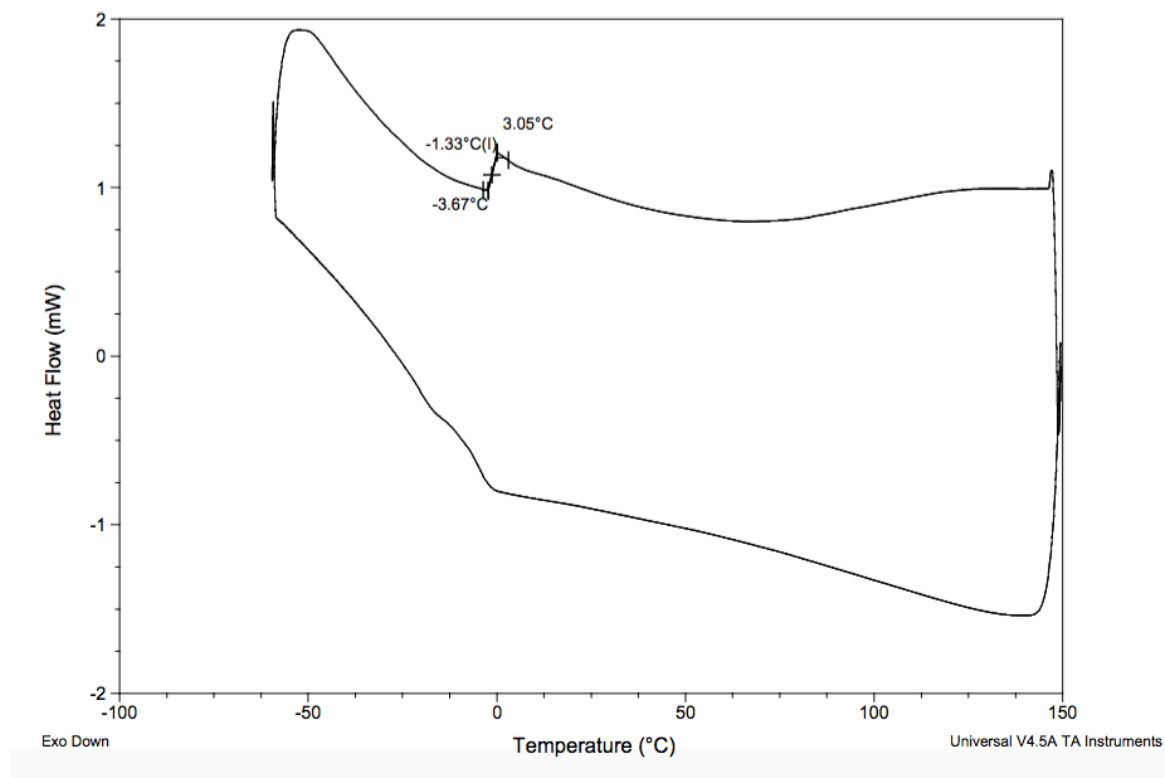

**Figure S27.** DSC thermogram for polypentylene camphorate (Table S1, Entry 5)

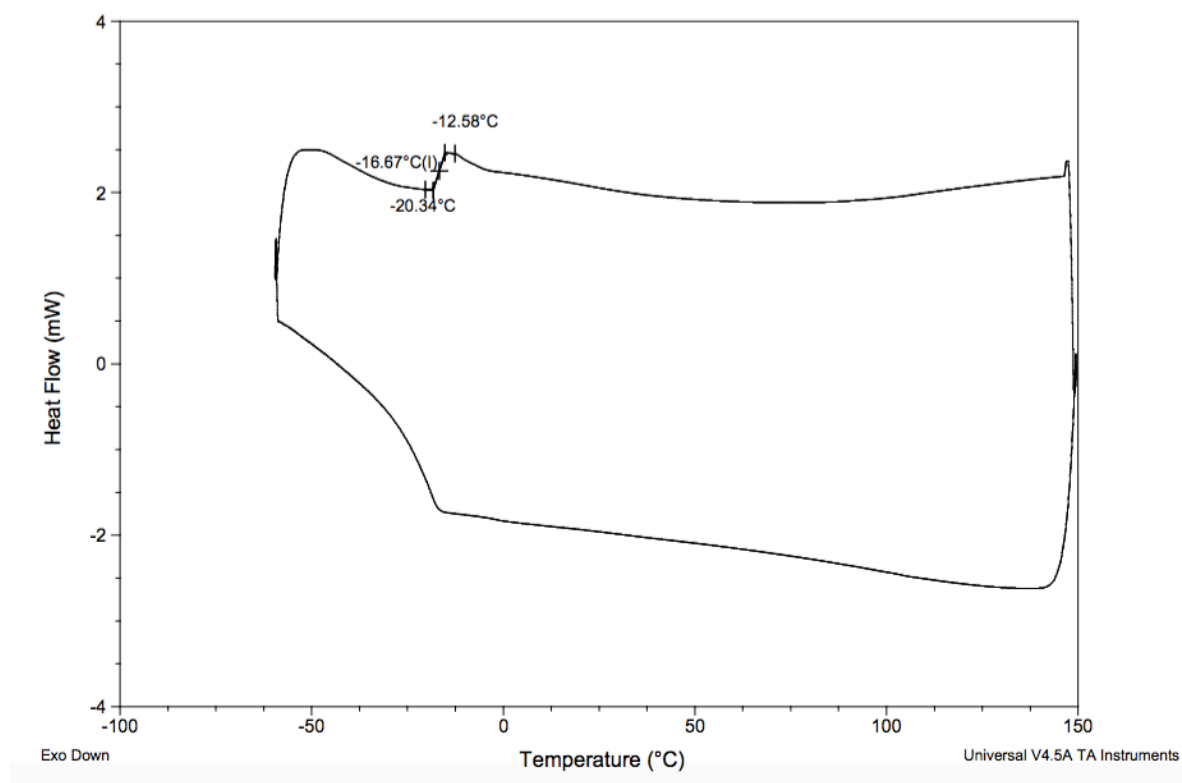

**Figure S28.** DSC thermogram for polyhexylene camphorate (Table S1, Entry 6)

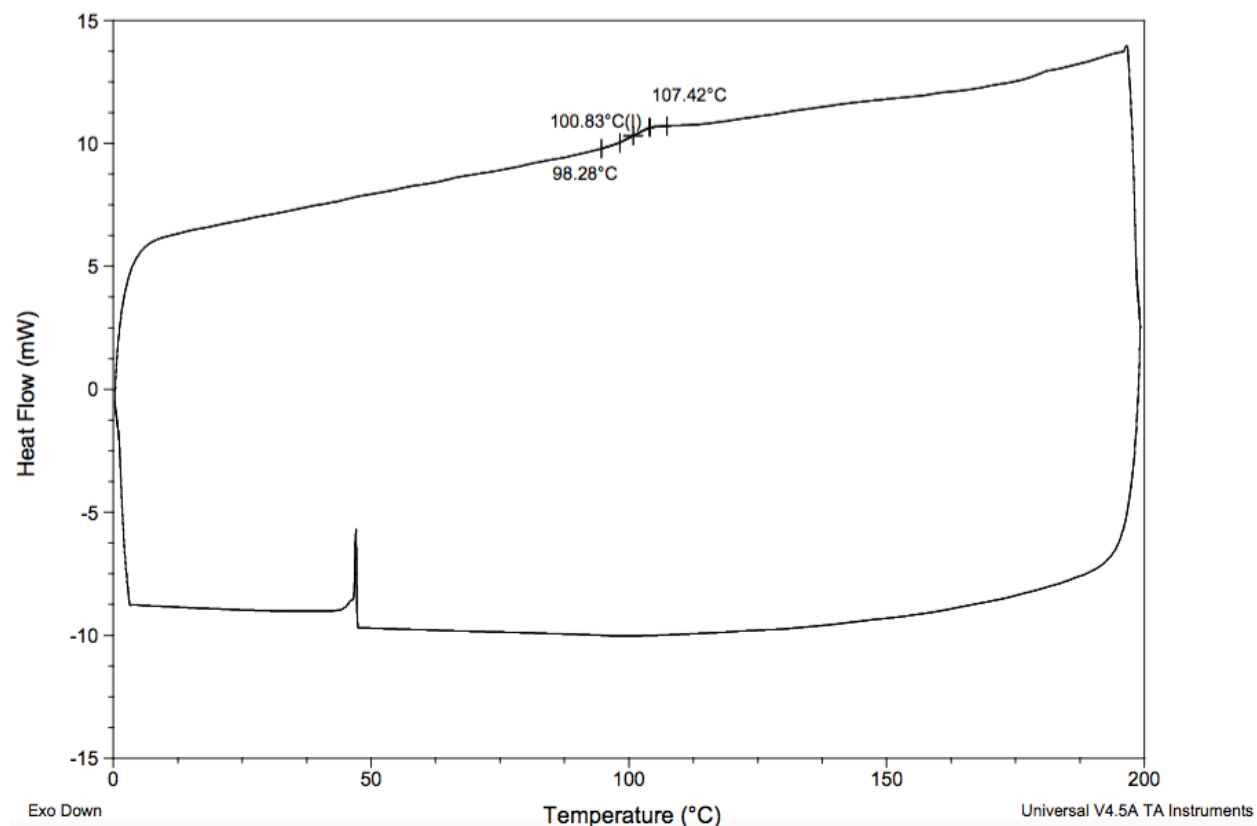

**Figure S29.** DSC thermogram for polyerythritan camphorate (Table S1, Entry 7)

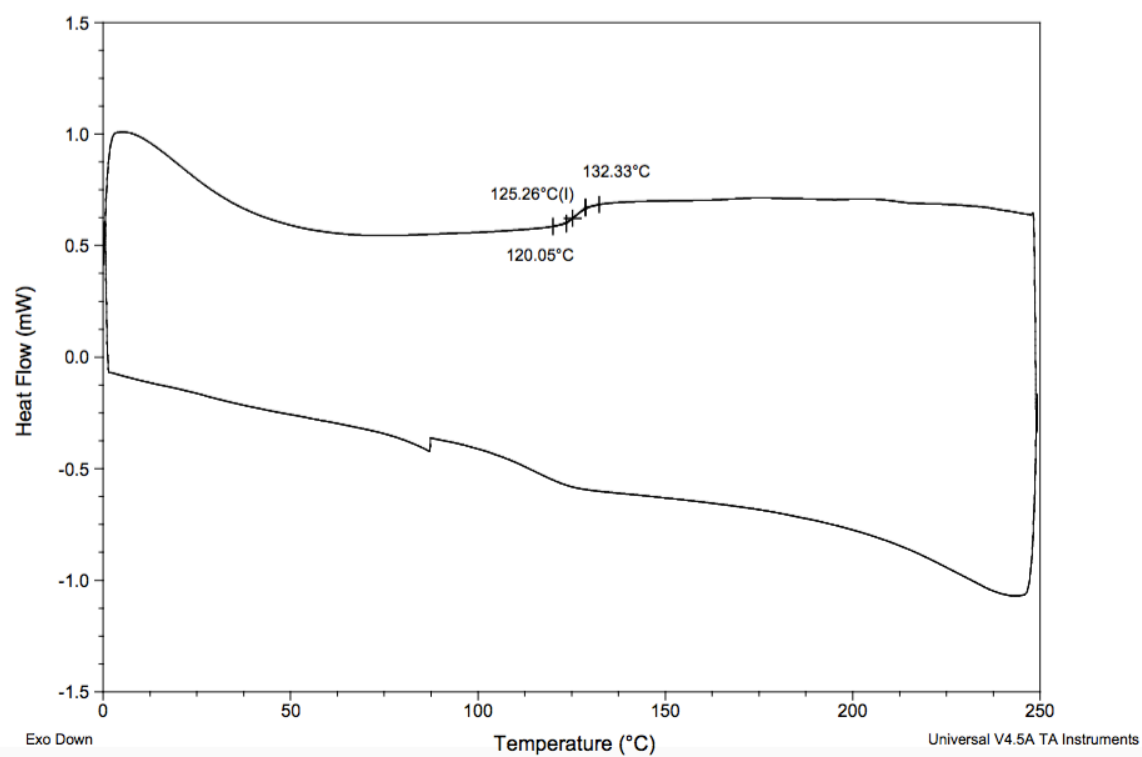

**Figure S30.** DSC thermogram for polyisobutide camphorate (Table S1, Entry 8)

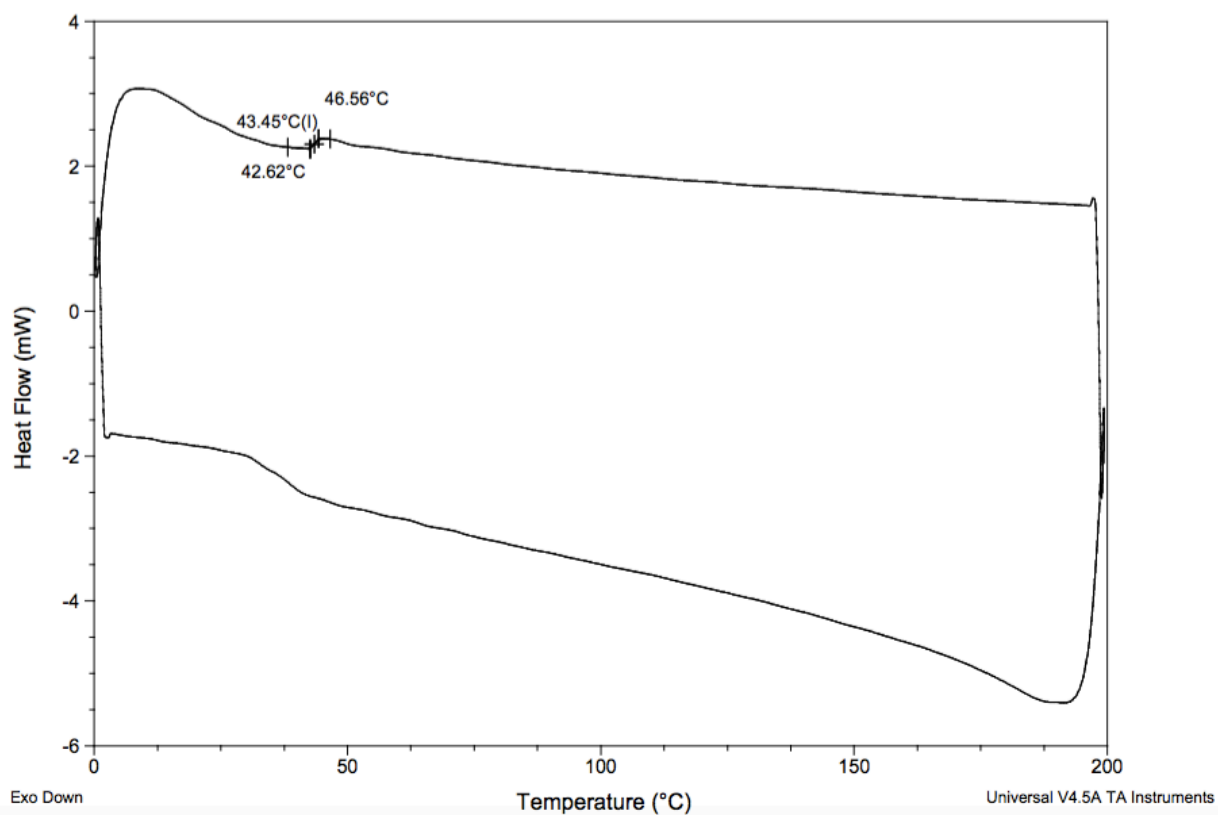

**Figure S31.** DSC thermogram for polyBHEC/BHET (Table S2, Entry 1)

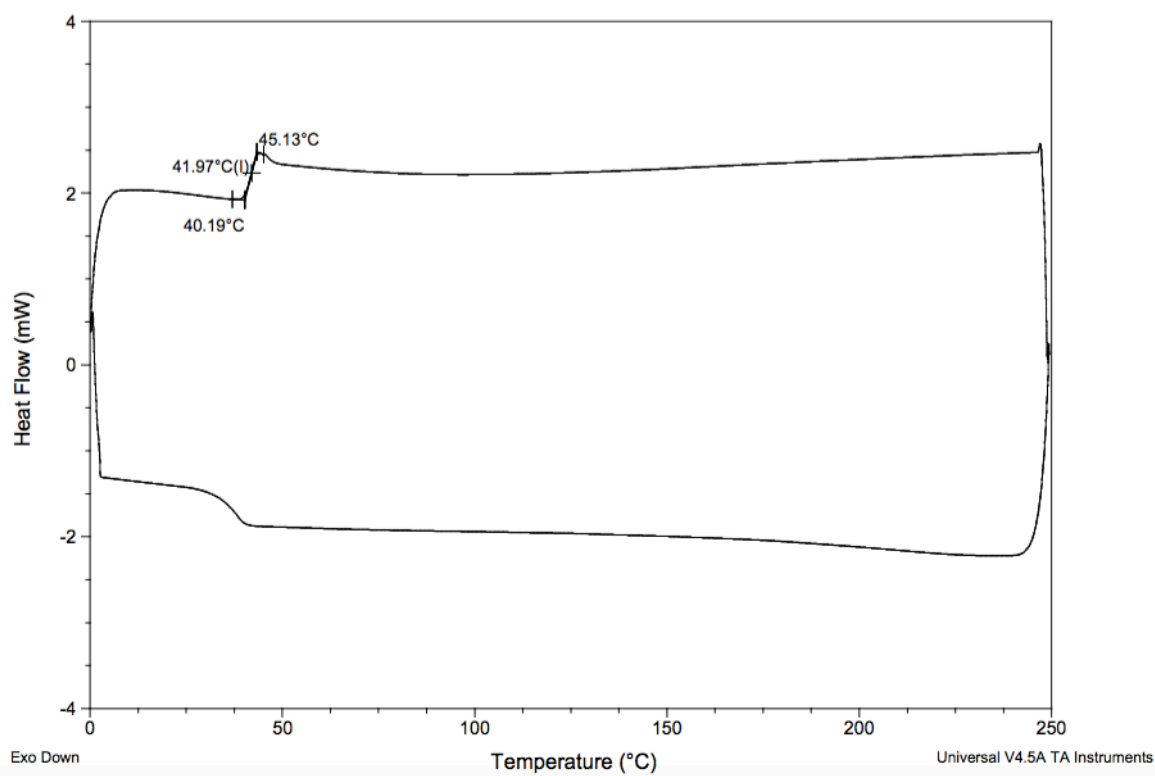

**Figure S32.** DSC thermogram for poly(BHEC/BHET) with 90% BHEC (Table S2, Entry 2)



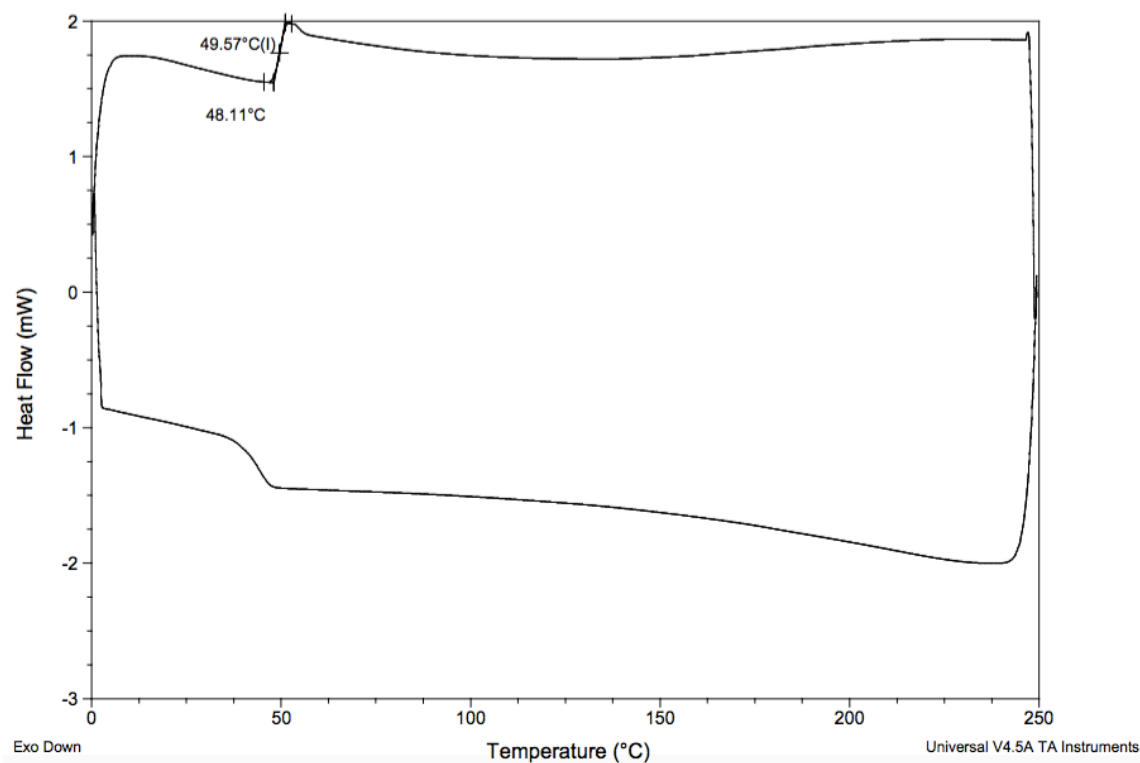

**Figure S33.** DSC thermogram for poly(BHEC/BHET) with 80% BHEC (Table S2, Entry 3)

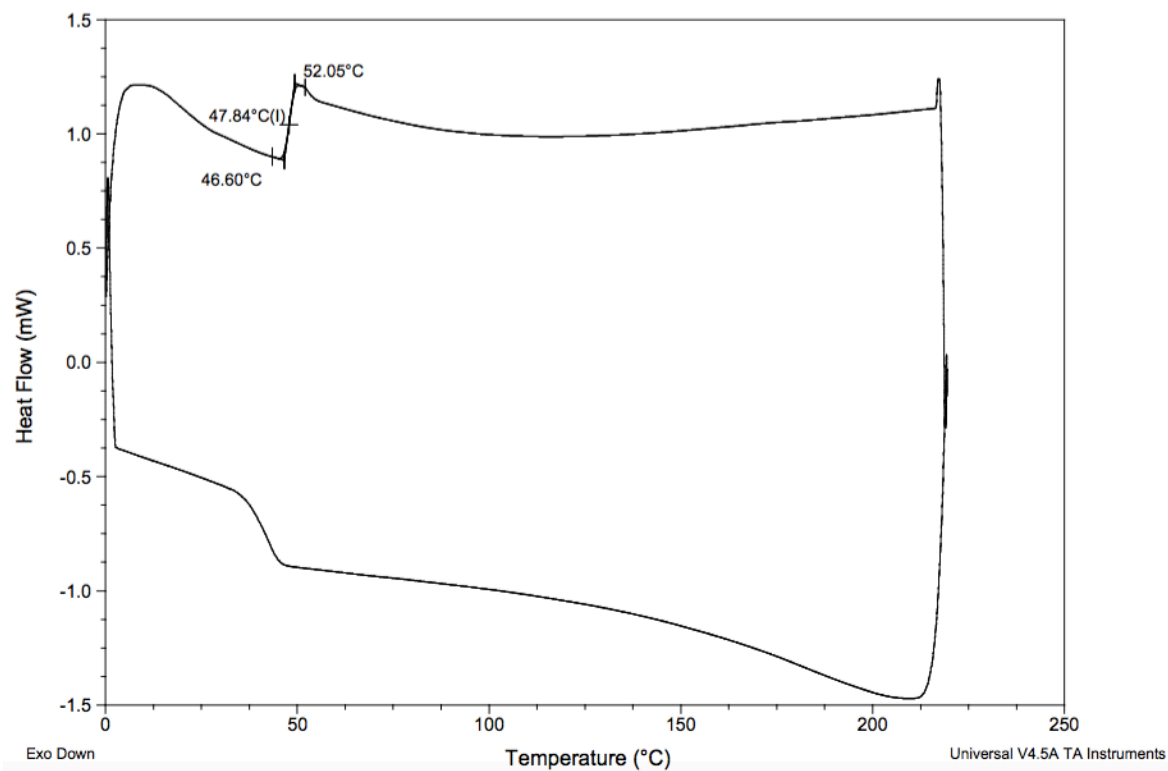

**Figure S34.** DSC thermogram for poly(BHEC/BHET) with 70% BHEC (Table S2, Entry 4)

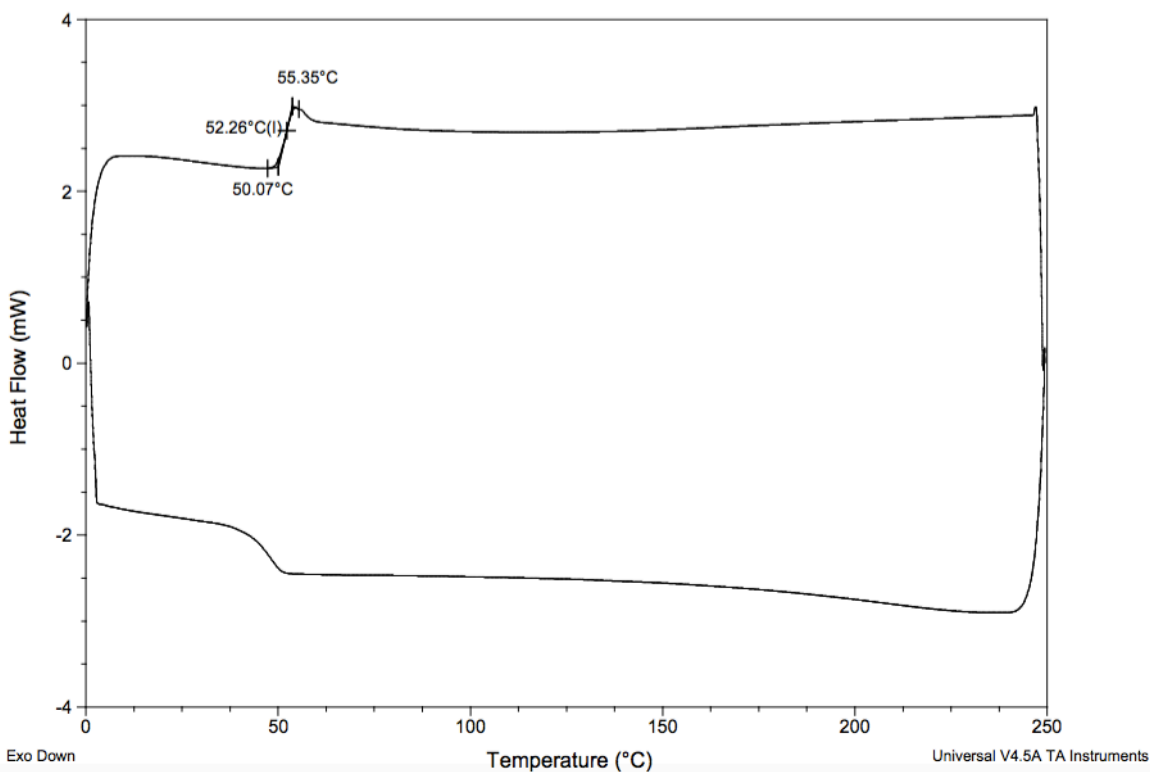

**Figure S35.** DSC thermogram for poly(BHEC/BHET) with 60% BHEC (Table S2, Entry 5)

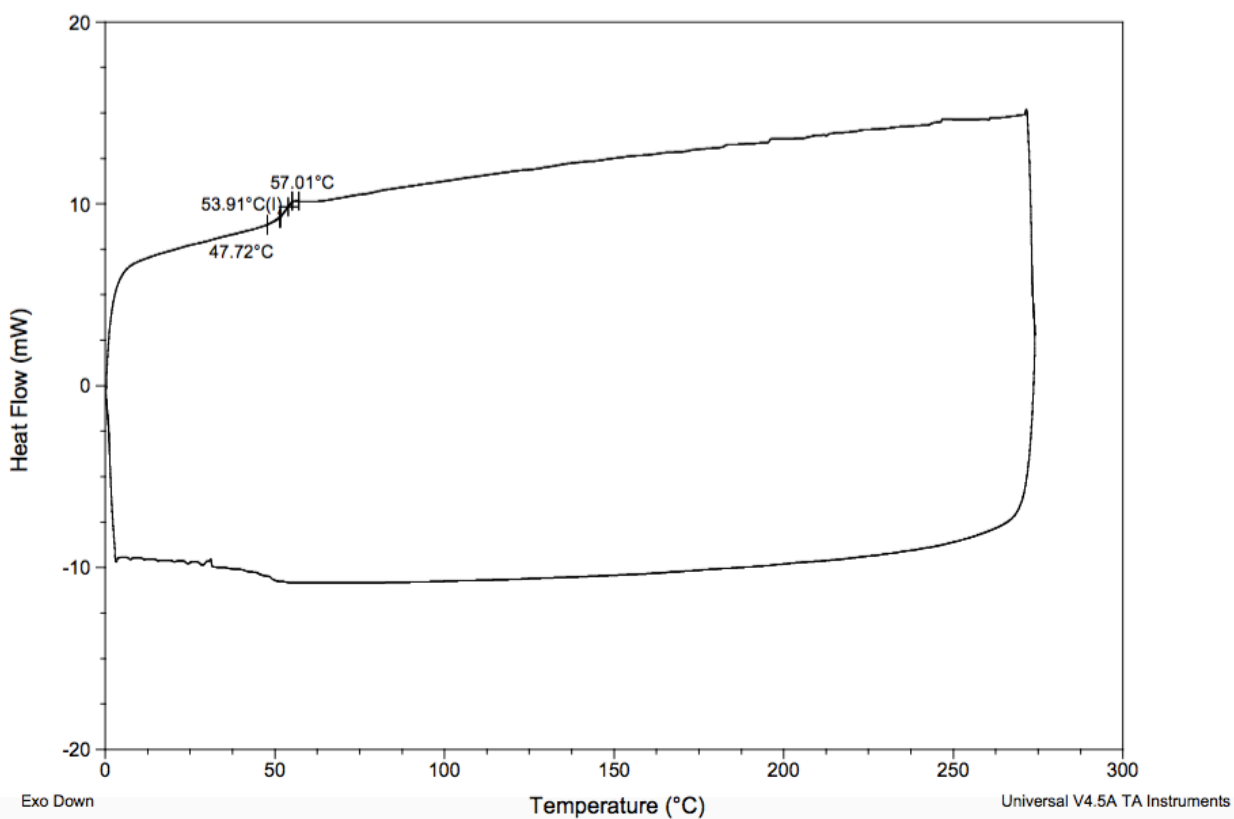

**Figure S36.** DSC thermogram for poly(BHEC/BHET) with 50% BHEC (Table S2, Entry 6)

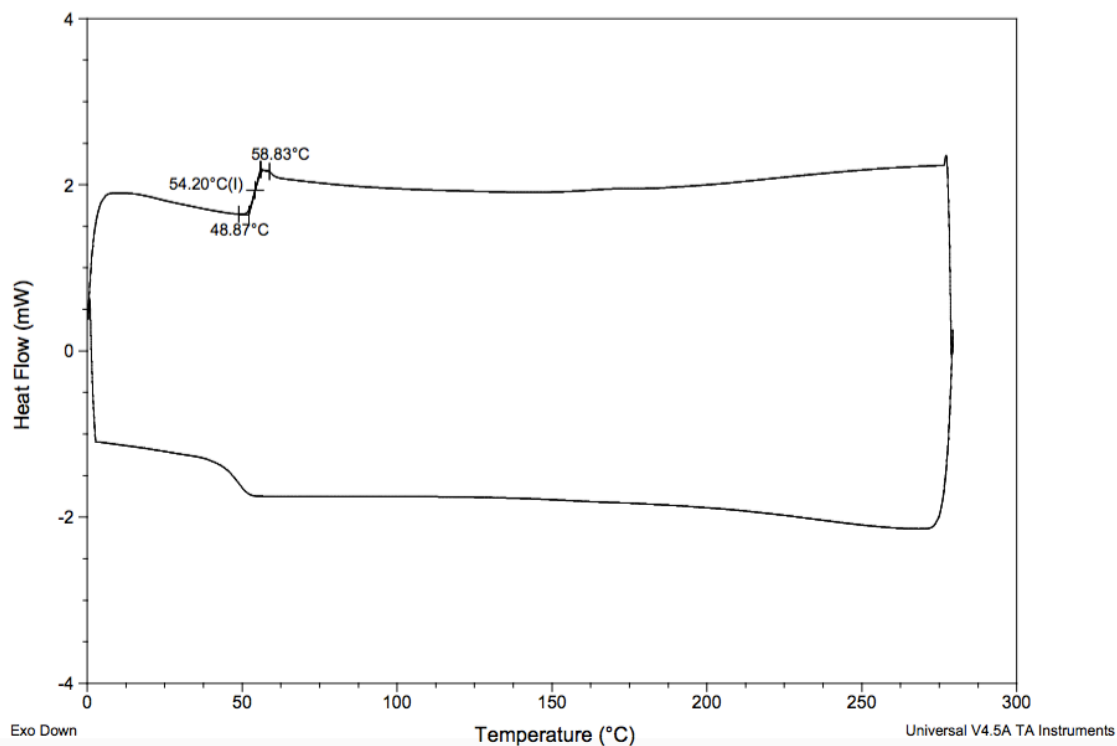

**Figure S37.** DSC thermogram for poly(BHEC/BHET) with 40% BHEC (Table S2, Entry 7)

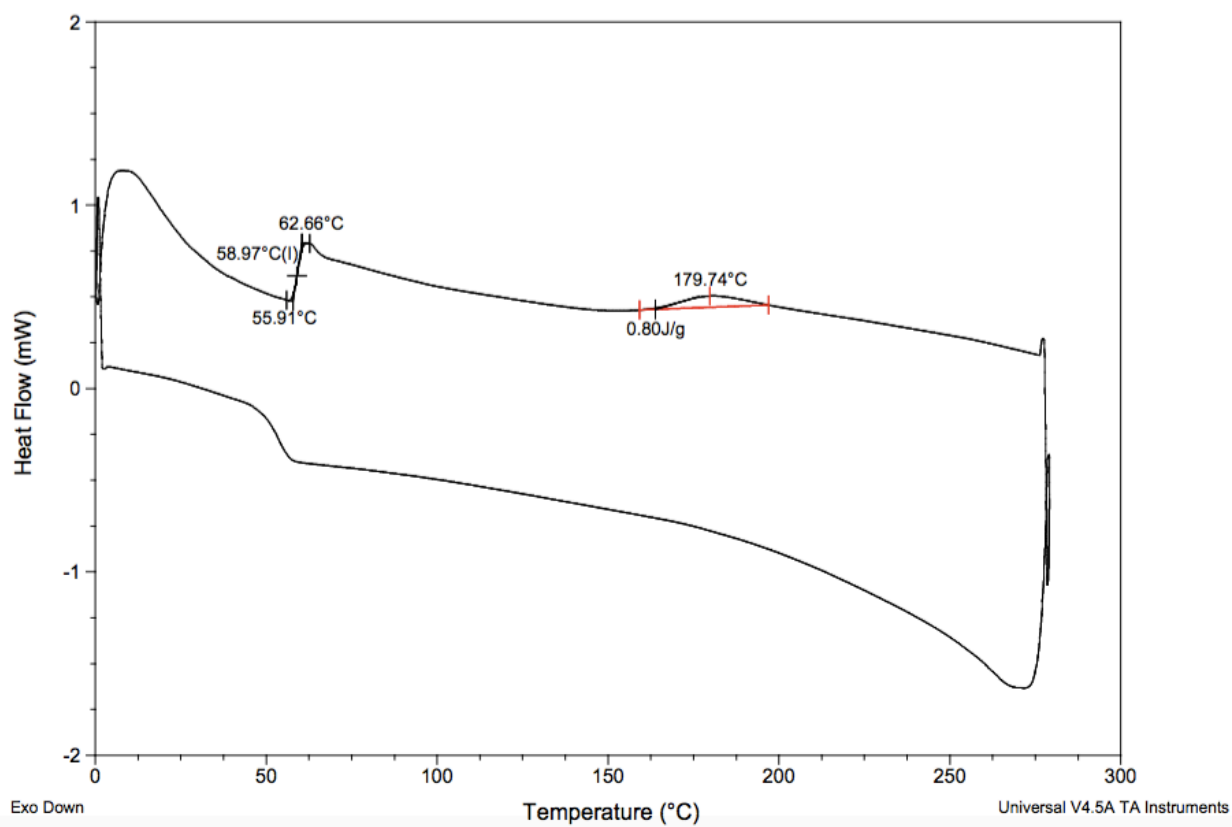

**Figure S38.** DSC thermogram for poly(BHEC/BHET) with 30% BHEC (Table S2, Entry 8)

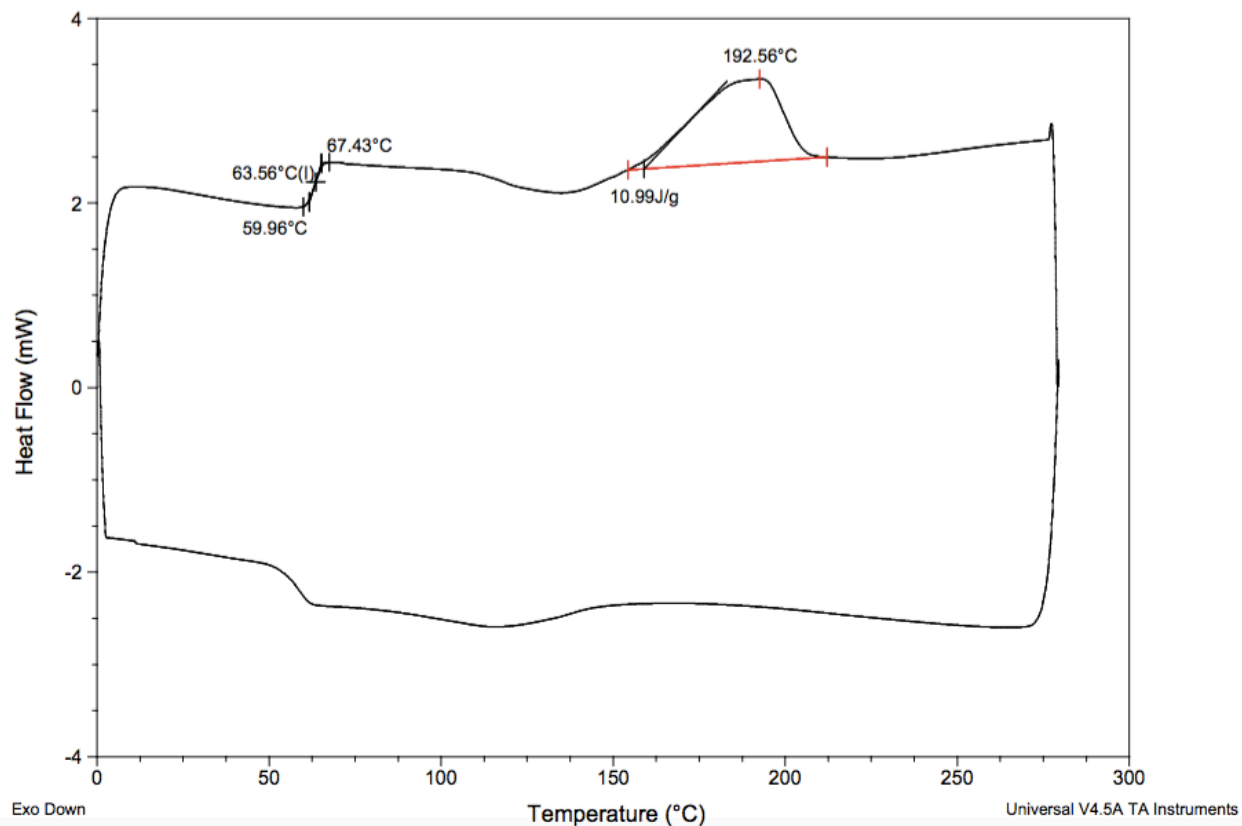

**Figure S39.** DSC thermogram for poly(BHEC/BHET) with 20% BHEC (Table S2, Entry 9)

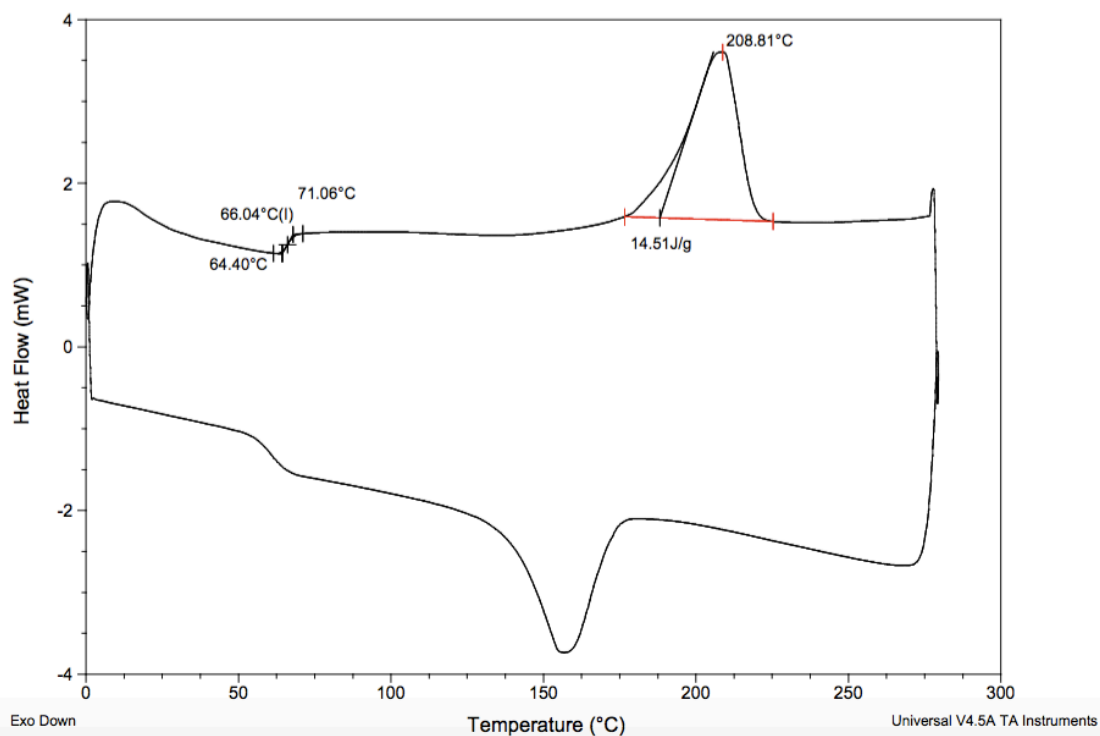

**Figure S40.** DSC thermogram for poly(BHEC/BHET) with 10% BHEC (Table S2, Entry 10)

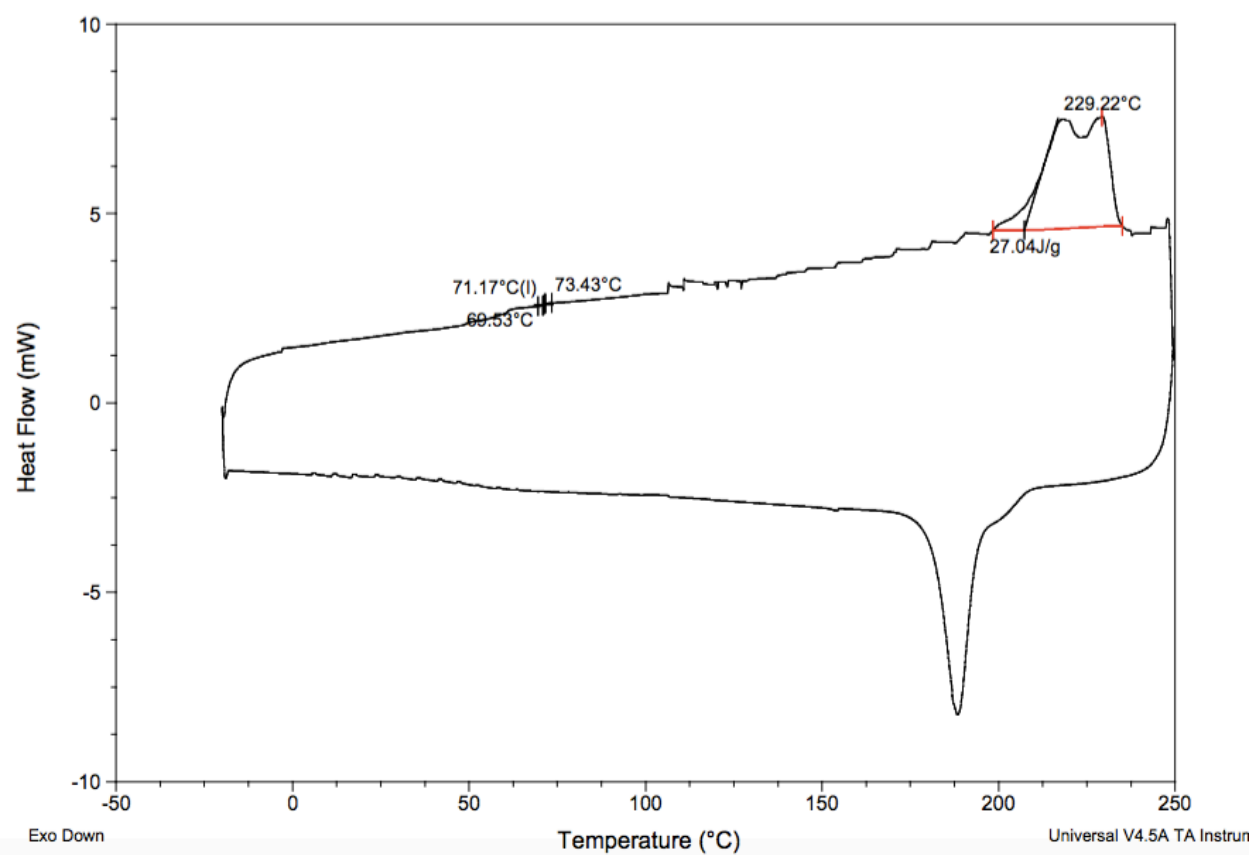

**Figure S41.** DSC thermogram for polyBHET (Table S2, Entry 11)

## Thermogravimetric Analysis (TGA) Thermograms

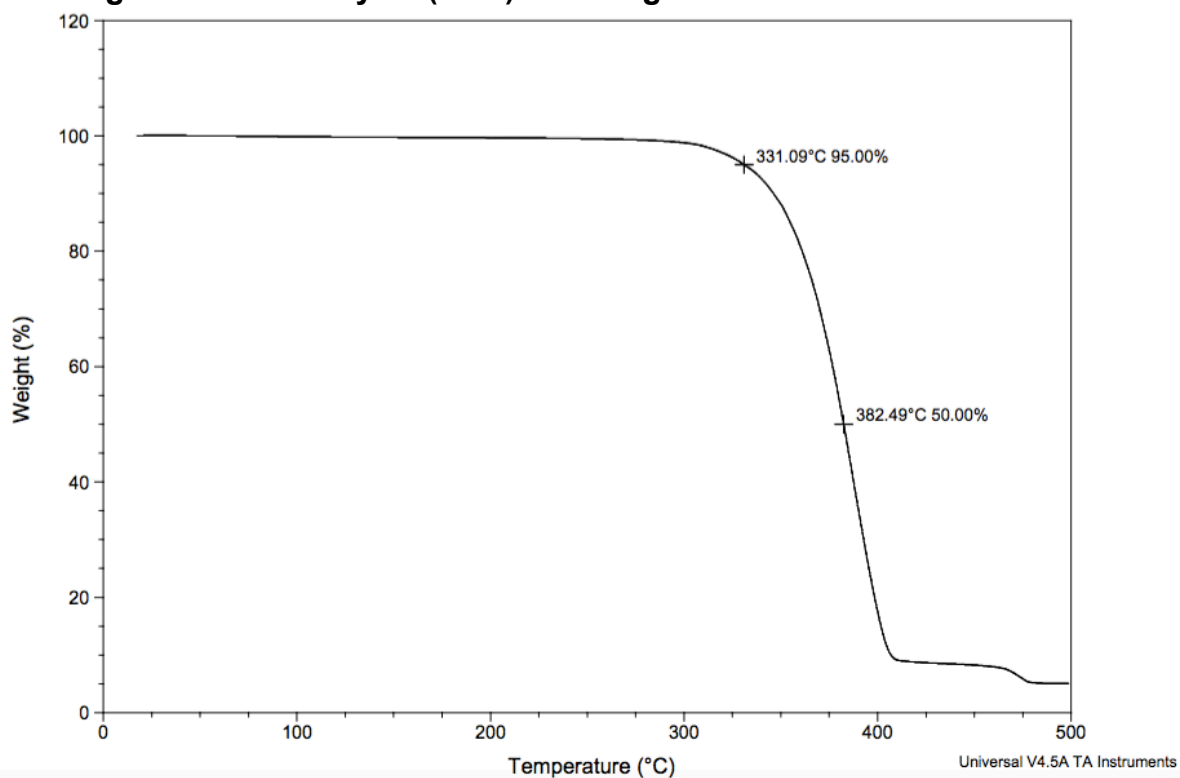

**Figure S42.** TGA thermogram for polyethylene camphorate (Table S1, Entry 1)

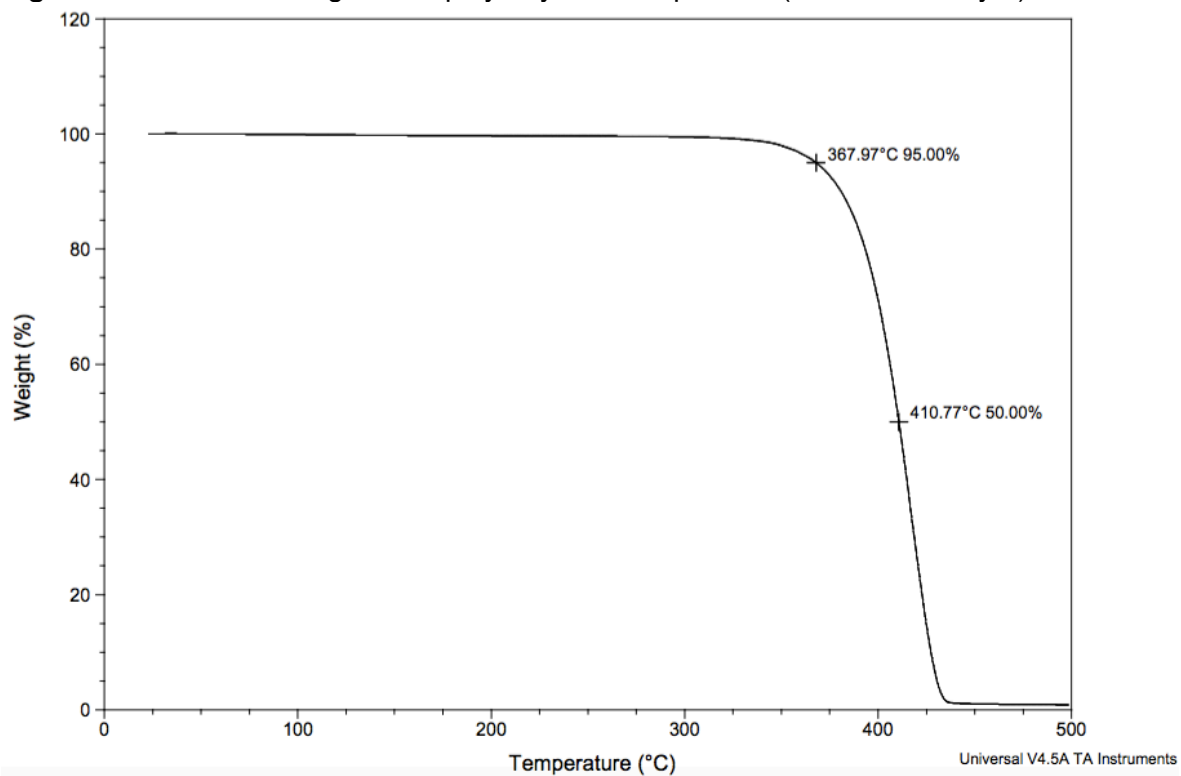

**Figure S43.** TGA thermogram for polyethylene camphorate [dual catalyst] (Table S1, Entry 2)

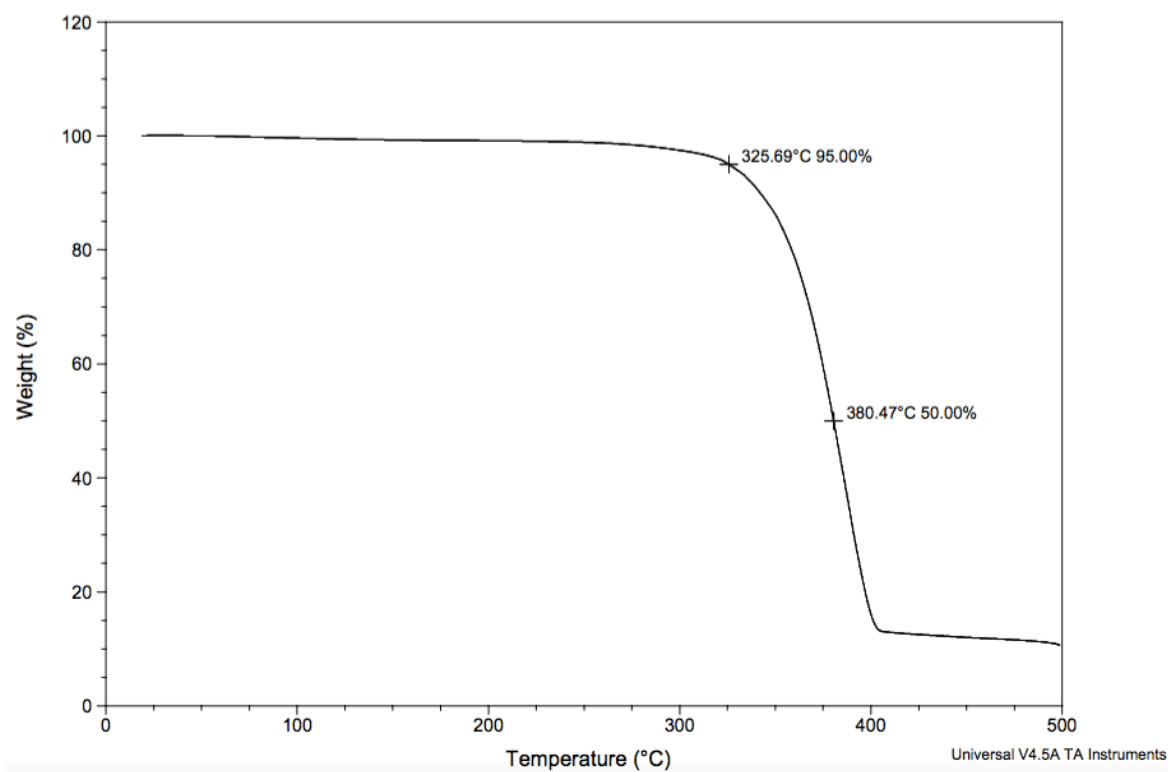

**Figure S44.** TGA thermogram for polypropylene camphorate (Table S1, Entry 3)

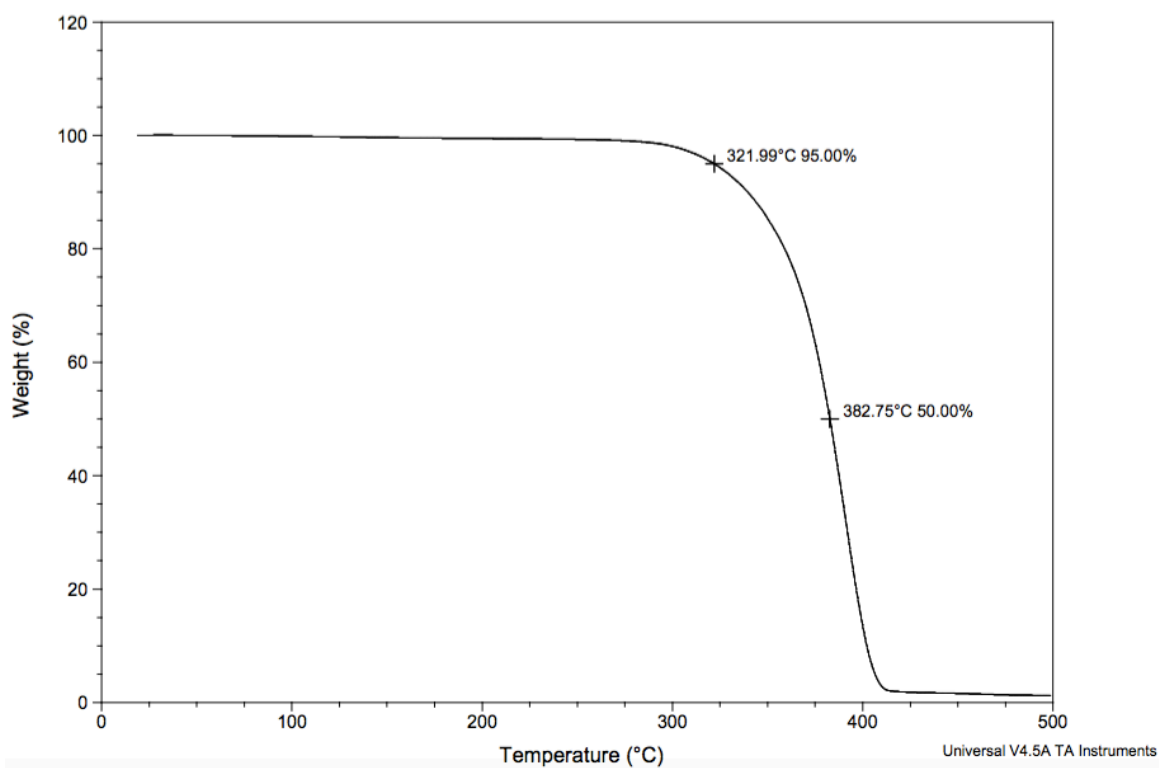

**Figure S45.** TGA thermogram for polybutylene camphorate (Table S1, Entry 4)

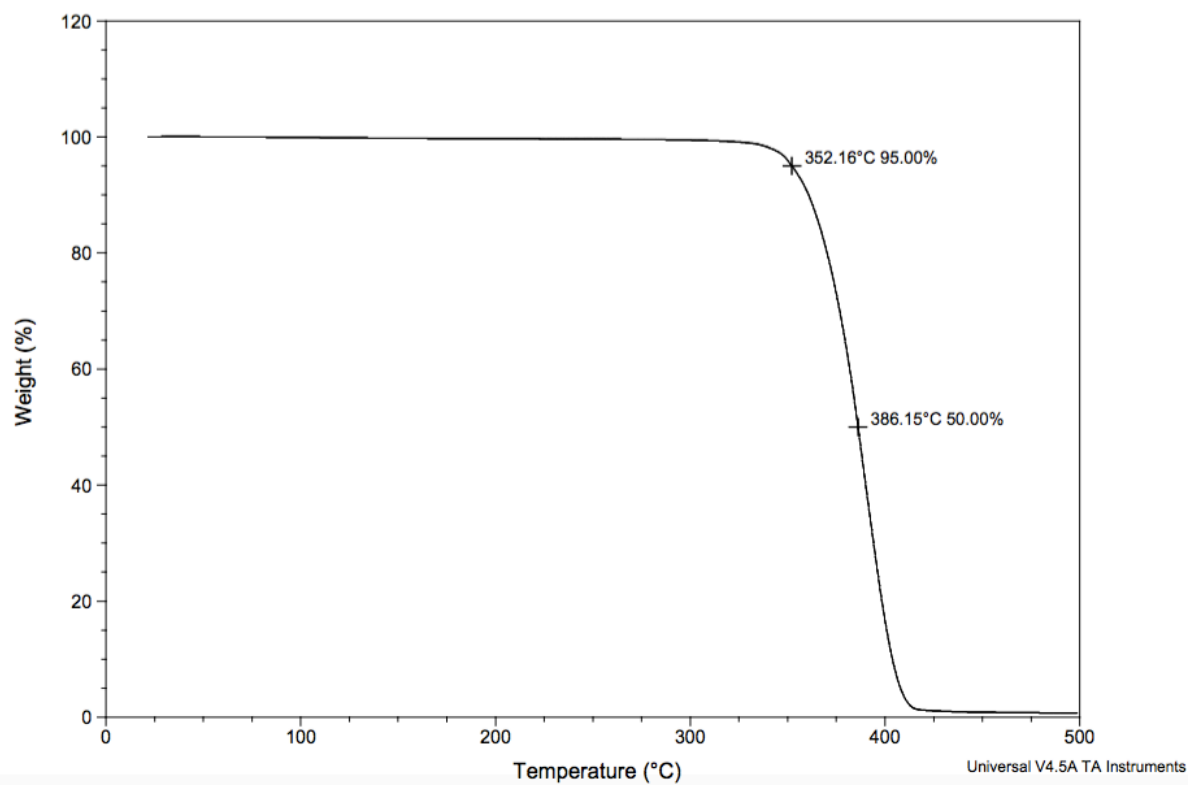

**Figure S46.** TGA thermogram for polypentylene camphorate (Table S1, Entry 5)

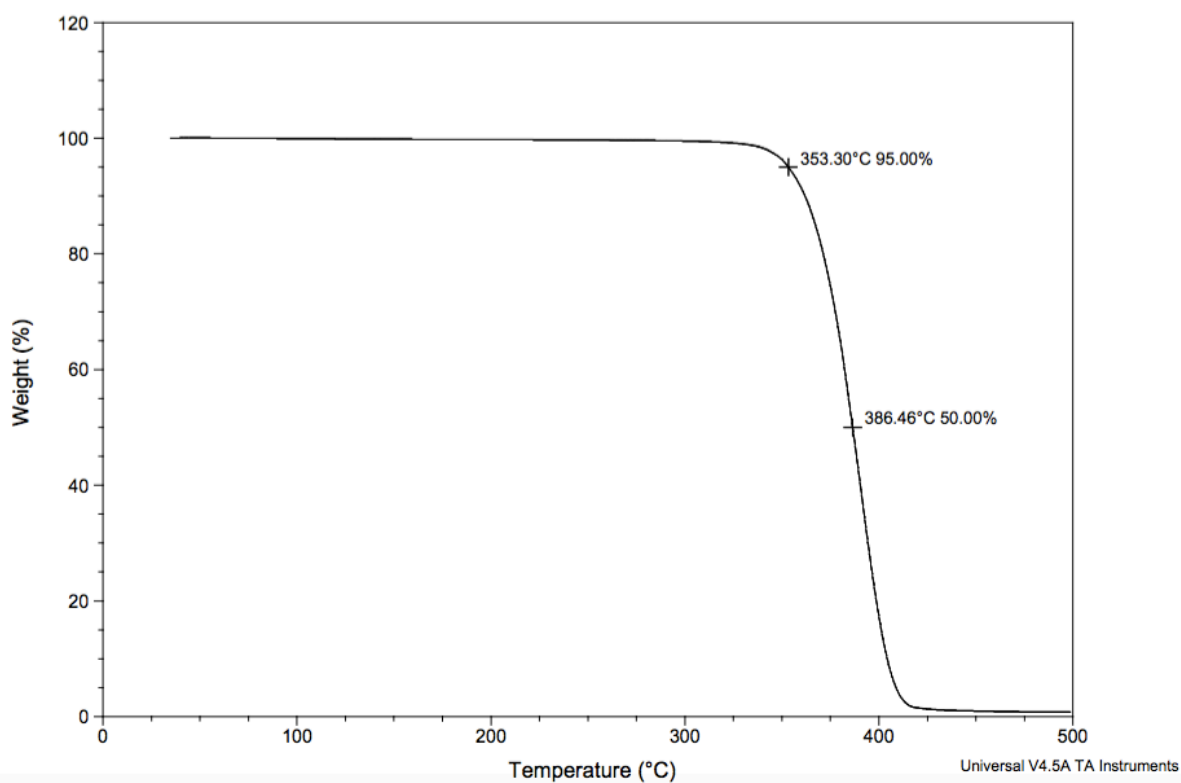

**Figure S47.** TGA thermogram for polyhexylene camphorate (Table S1, Entry 6)



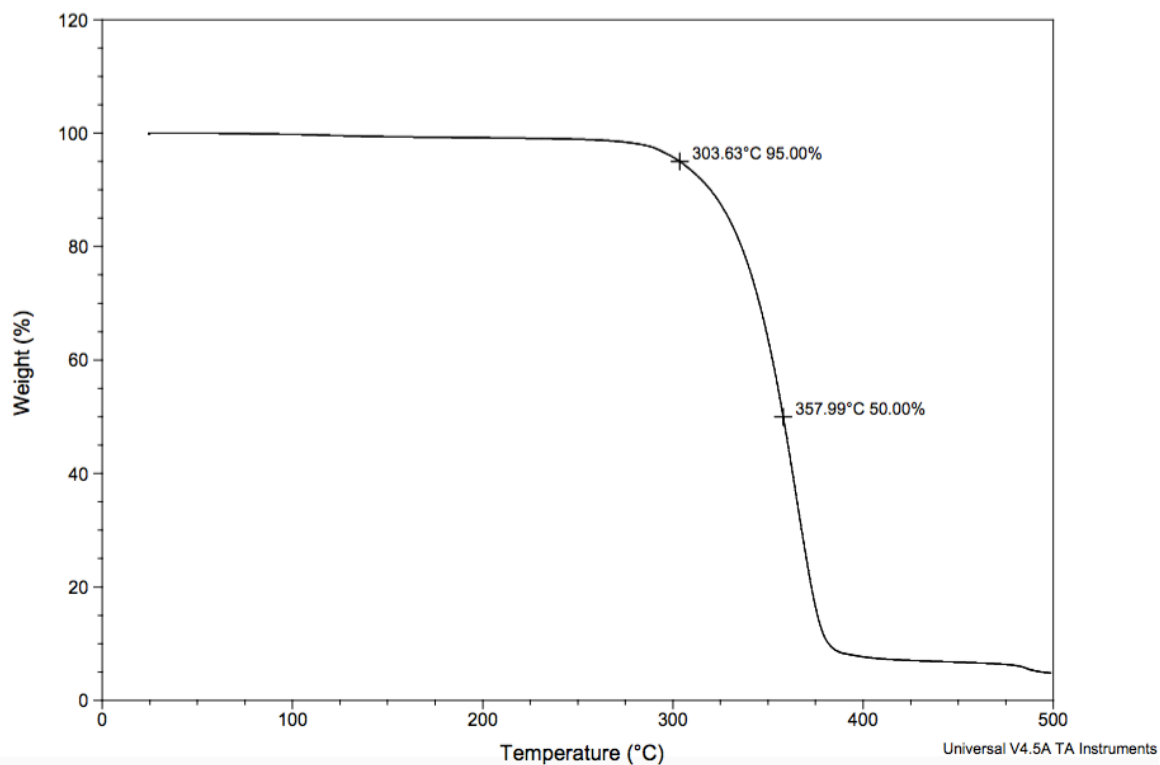

**Figure S48.** TGA thermogram for polyerythritan camphorate (Table S1, Entry 7)

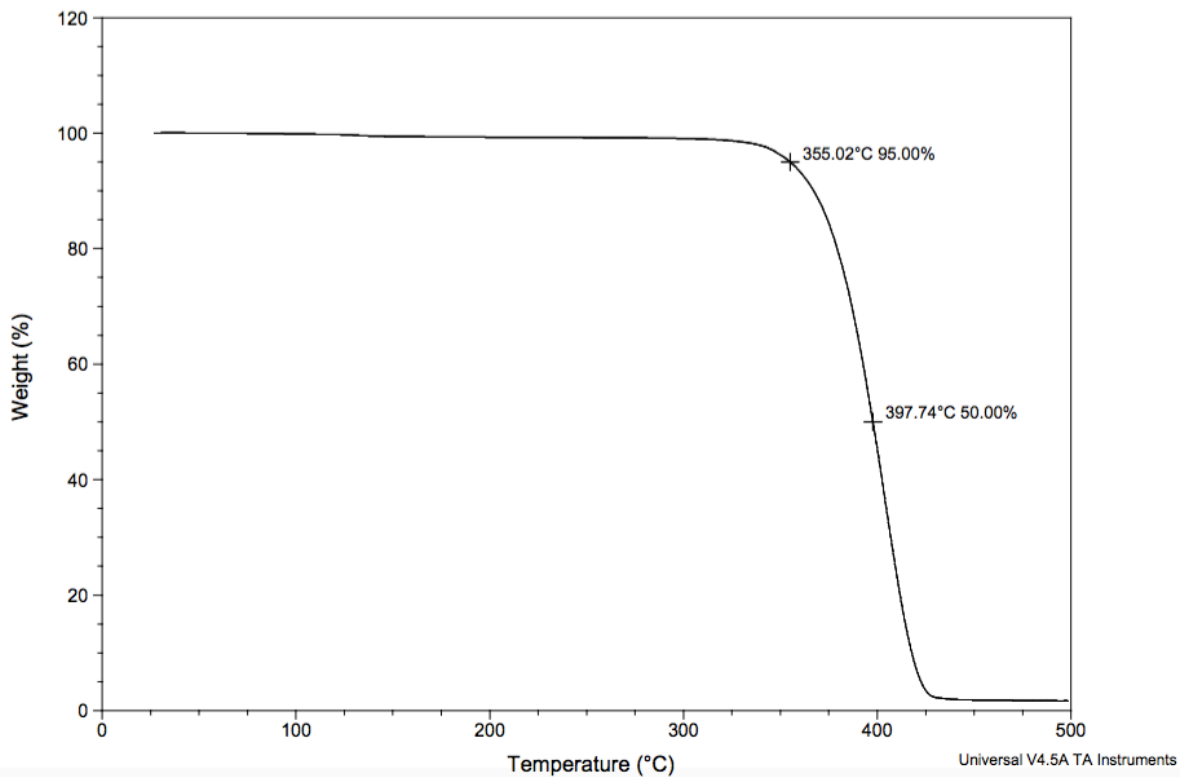

**Figure S49.** TGA thermogram for polyisosorbide camphorate (Table S1, Entry 8)

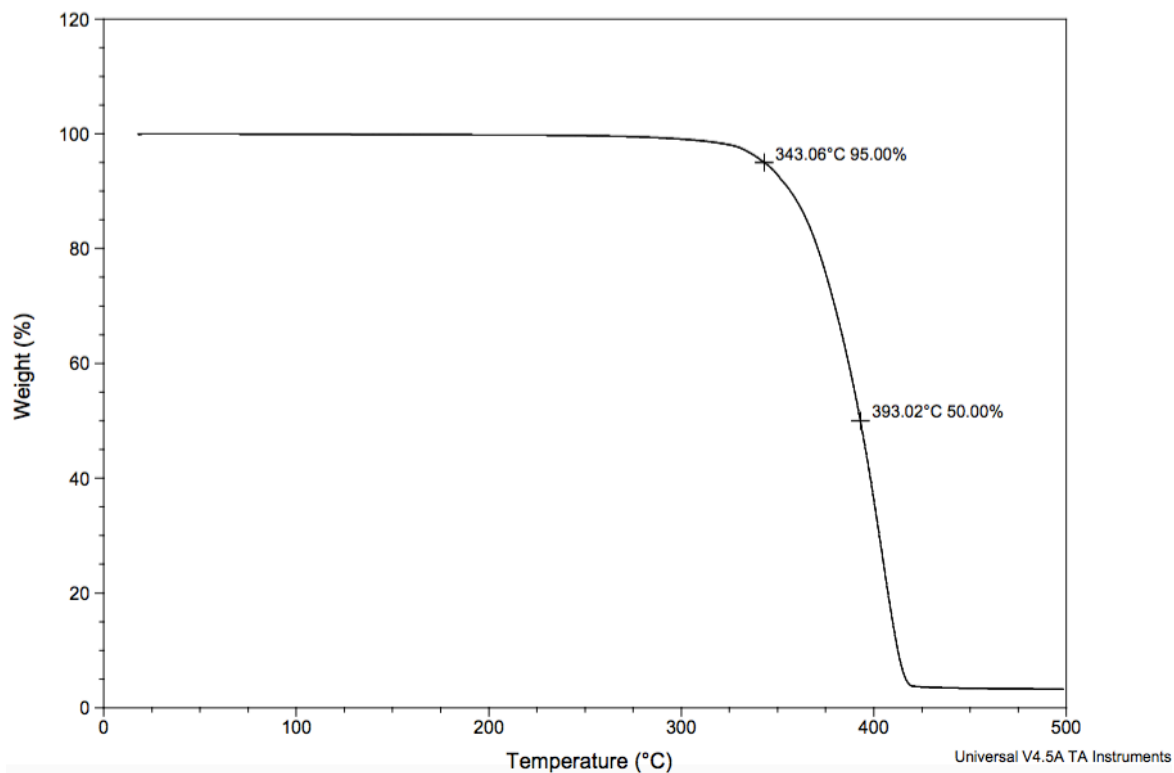

**Figure S50.** TGA thermogram for polyBHEC (Table S2, Entry 1)

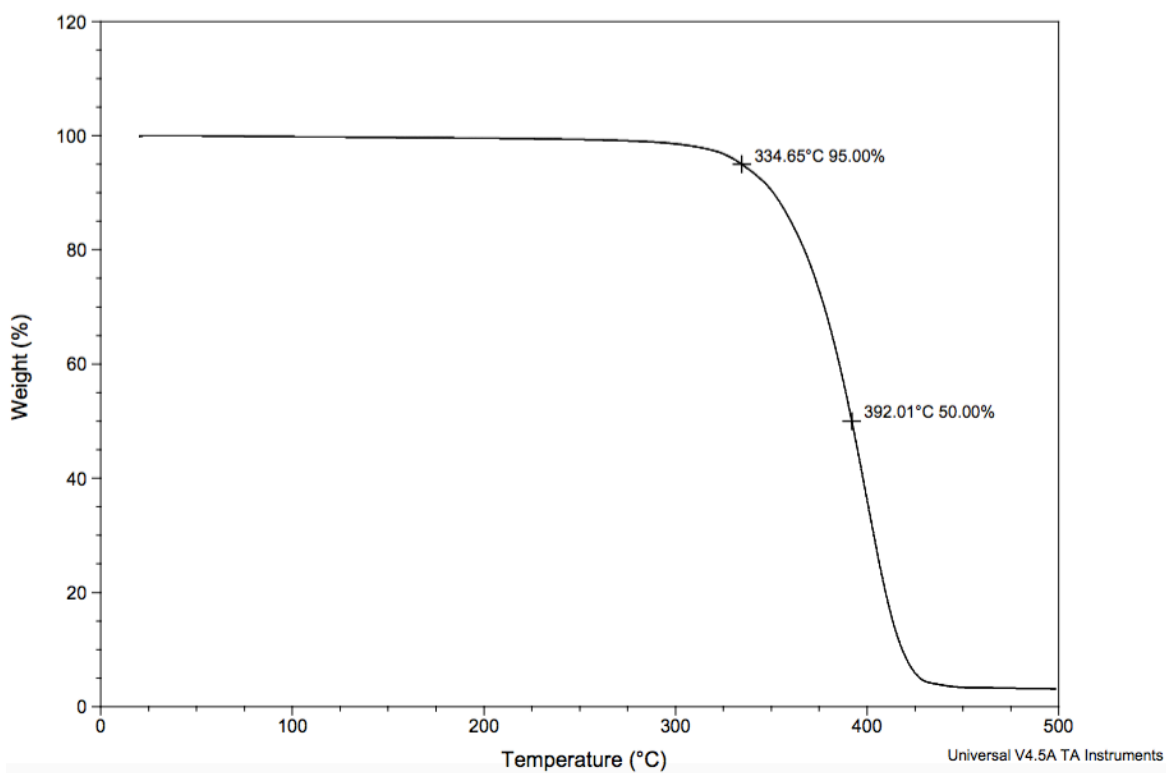

**Figure S51.** TGA thermogram for poly(BHEC/BHET) with 90% BHEC (Table S2, Entry 2)

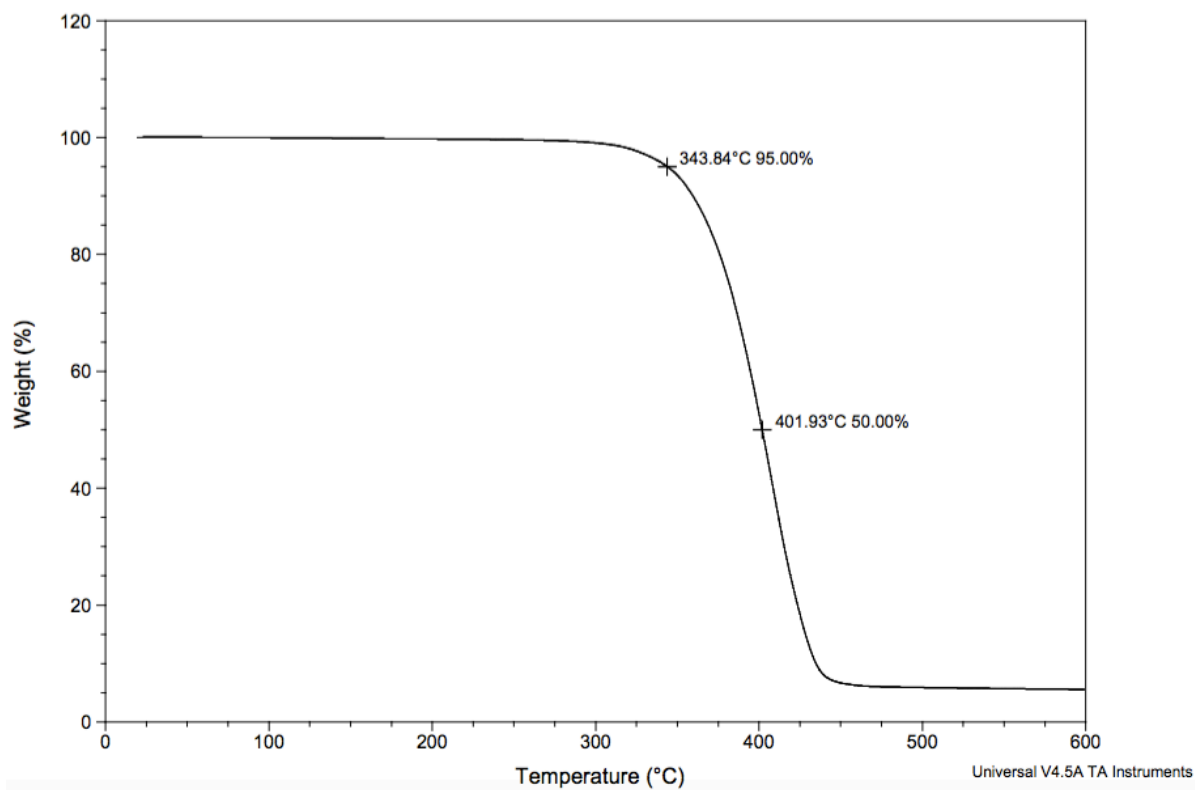

**Figure S52.** TGA thermogram for poly(BHEC/BHET) with 80% BHEC (Table S2, Entry 3)

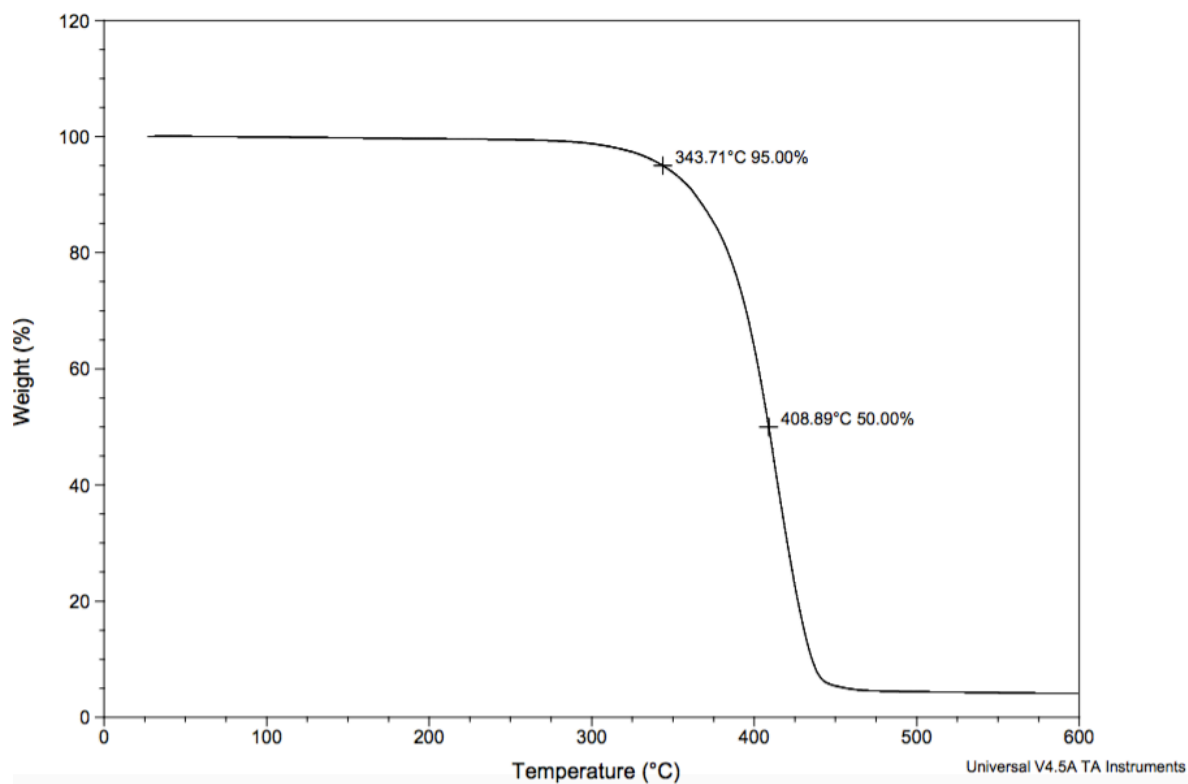

**Figure S53.** TGA thermogram for poly(BHEC/BHET) with 70% BHEC (Table S2, Entry 4)

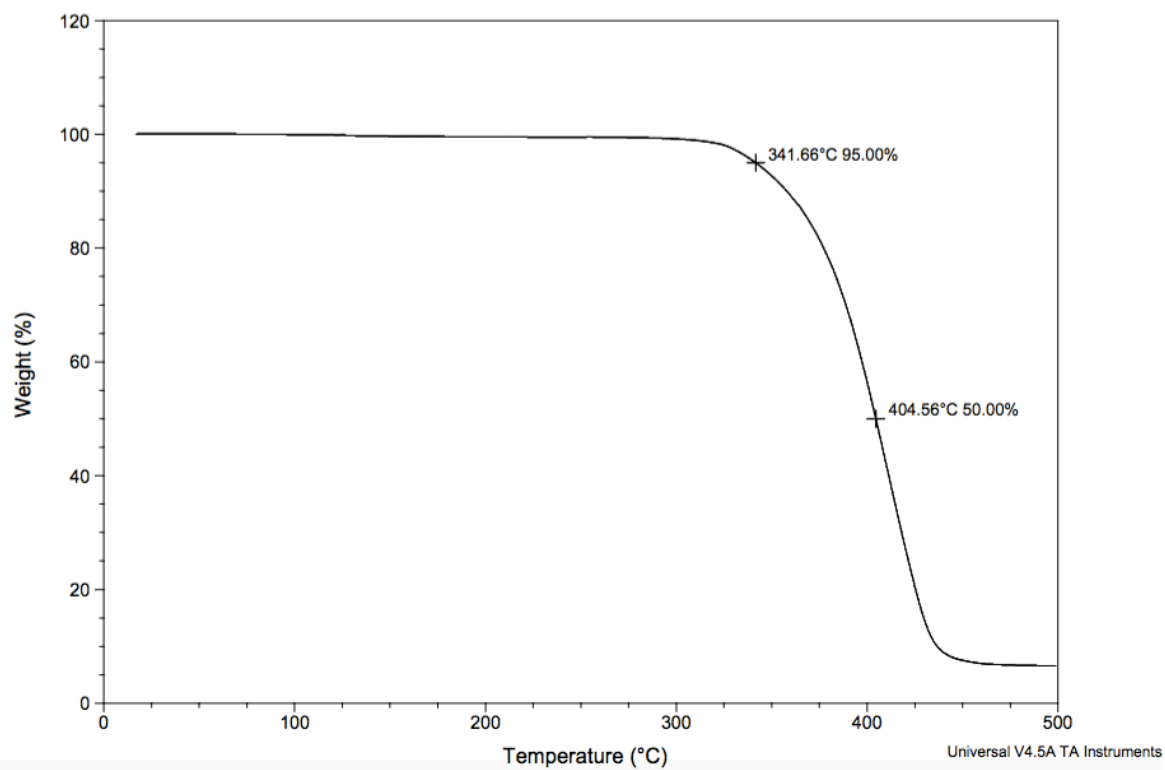

**Figure S54.** TGA thermogram for poly(BHEC/BHET) with 60% BHEC (Table S2, Entry 5)

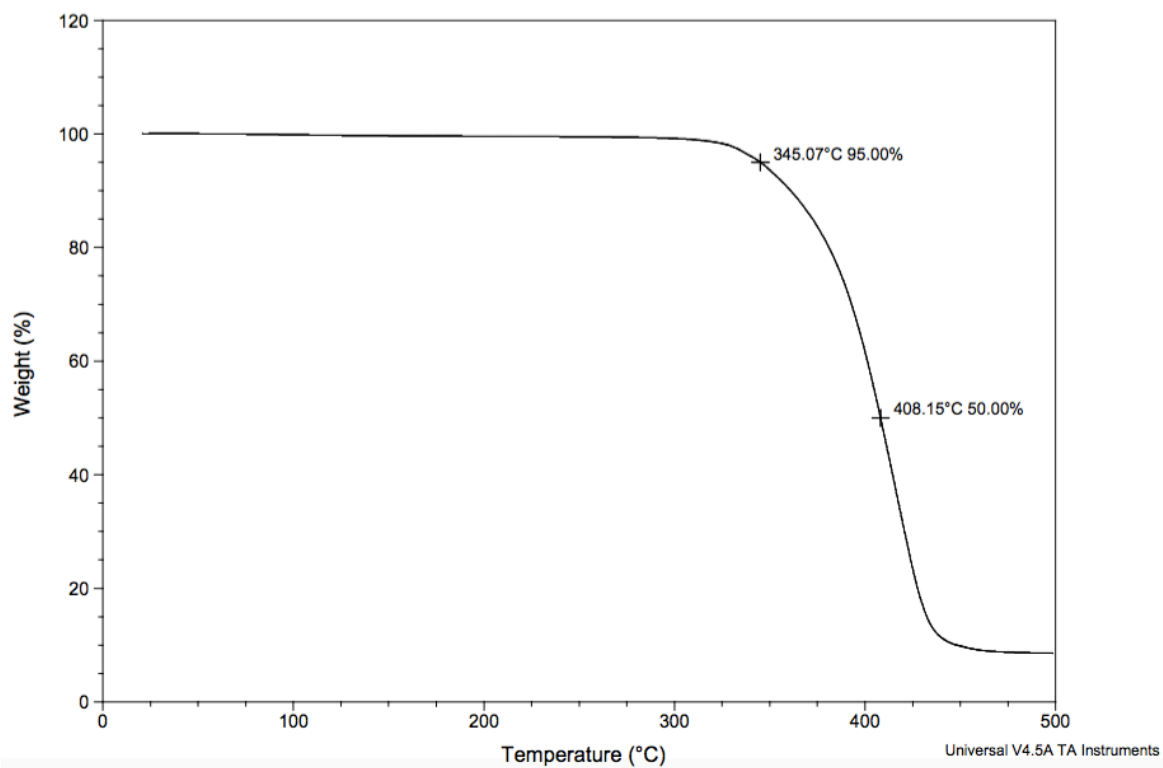

**Figure S55.** TGA thermogram for poly(BHEC/BHET) with 50% BHEC (Table S2, Entry 6)

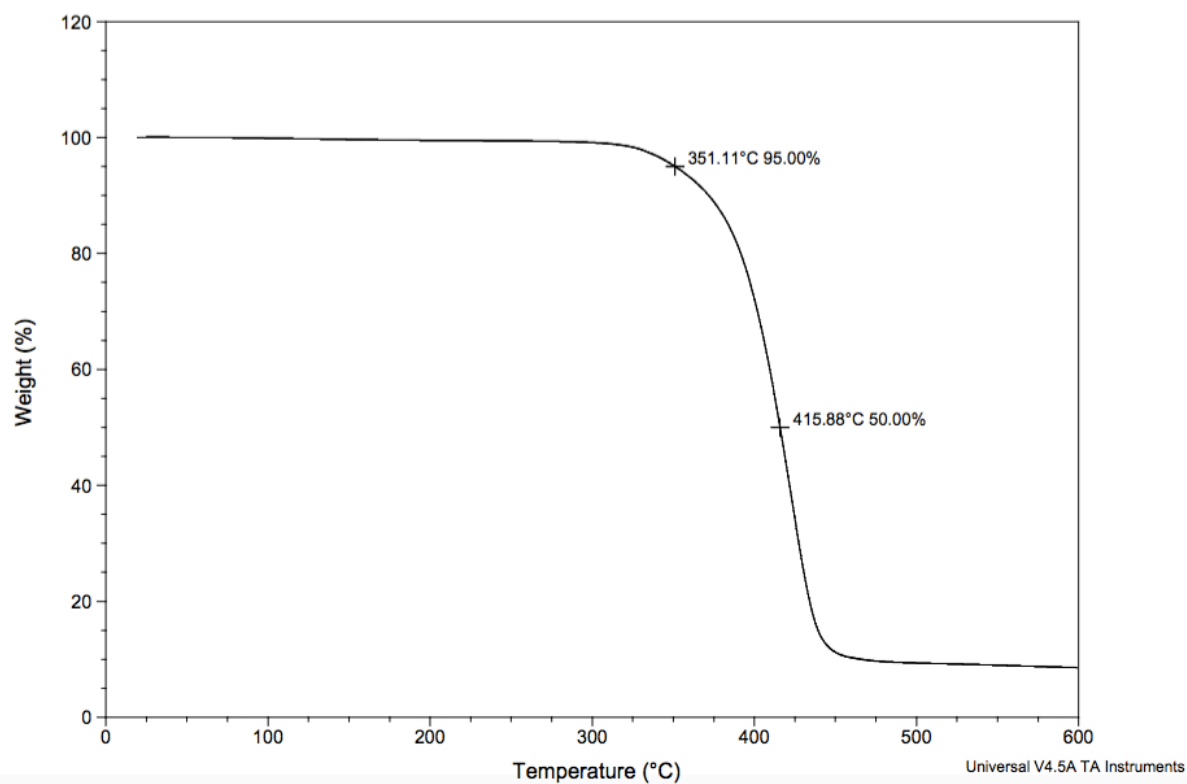

**Figure S56.** TGA thermogram for poly(BHEC/BHET) with 40% BHEC (Table S2, Entry 7)

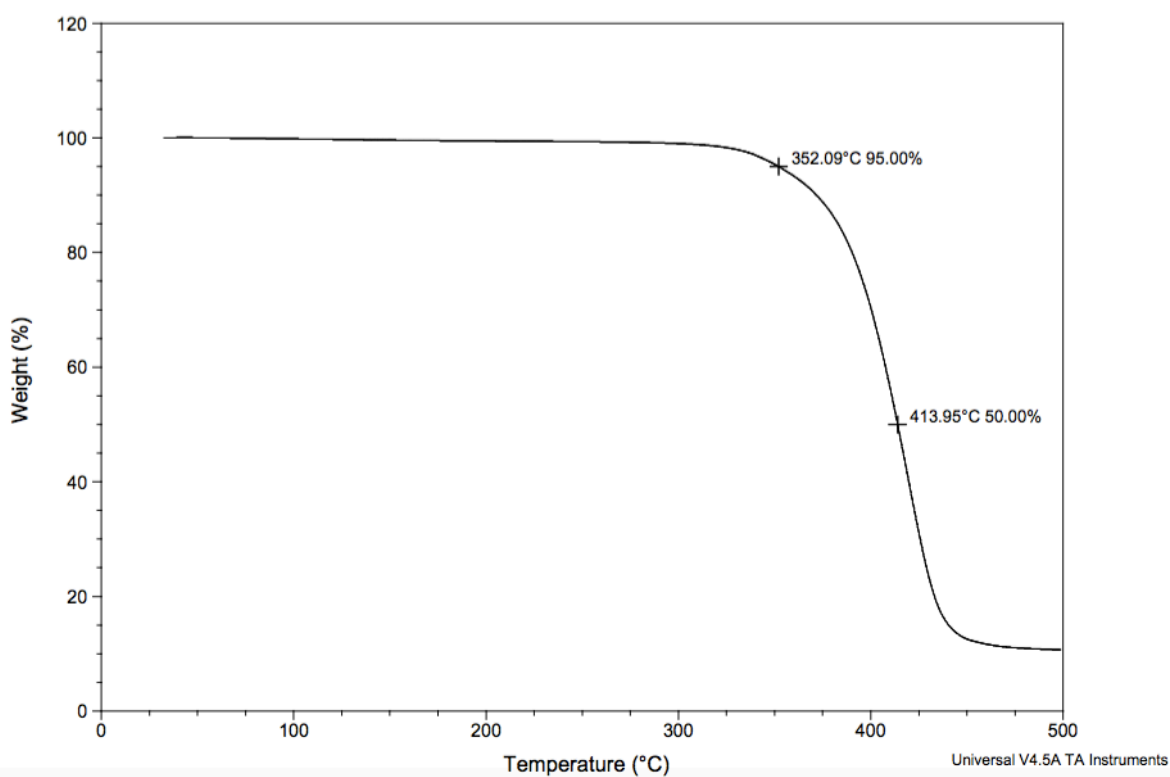

**Figure S57.** TGA thermogram for poly(BHEC/BHET) with 30% BHEC (Table S2, Entry 8)

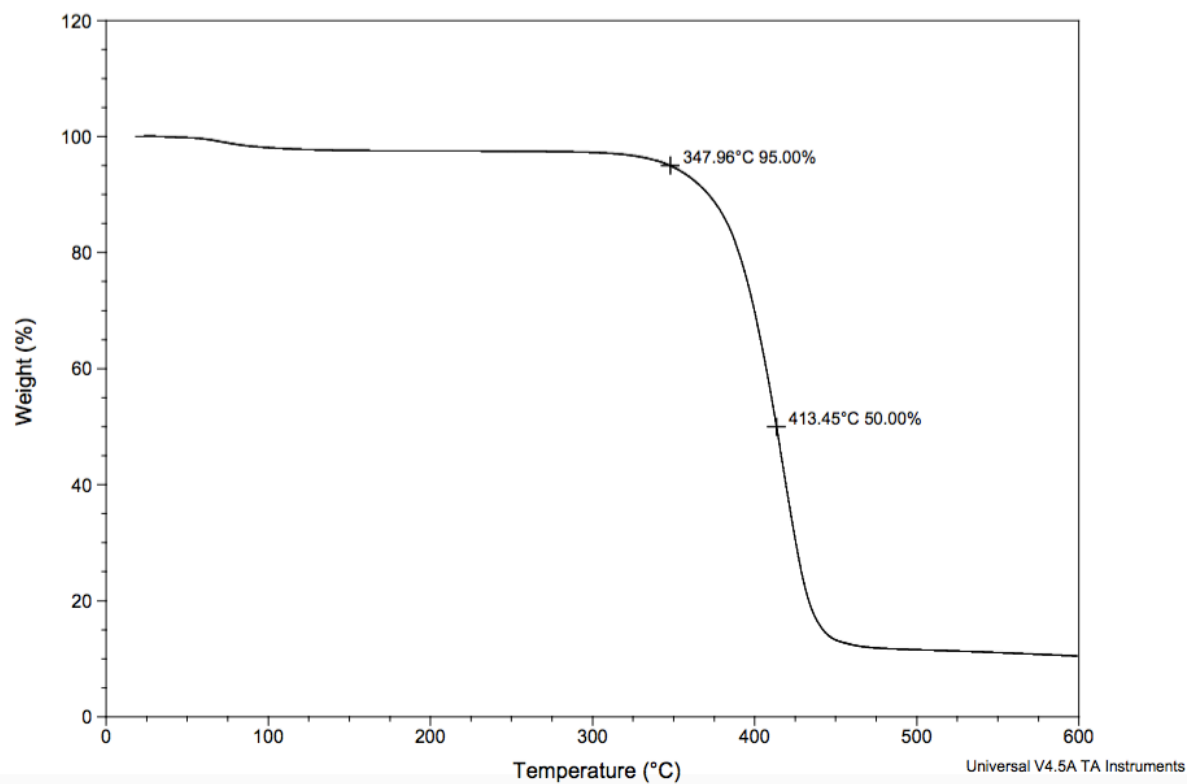

**Figure S58.** TGA thermogram for poly(BHEC/BHET) with 20% BHEC (Table S2, Entry 9)

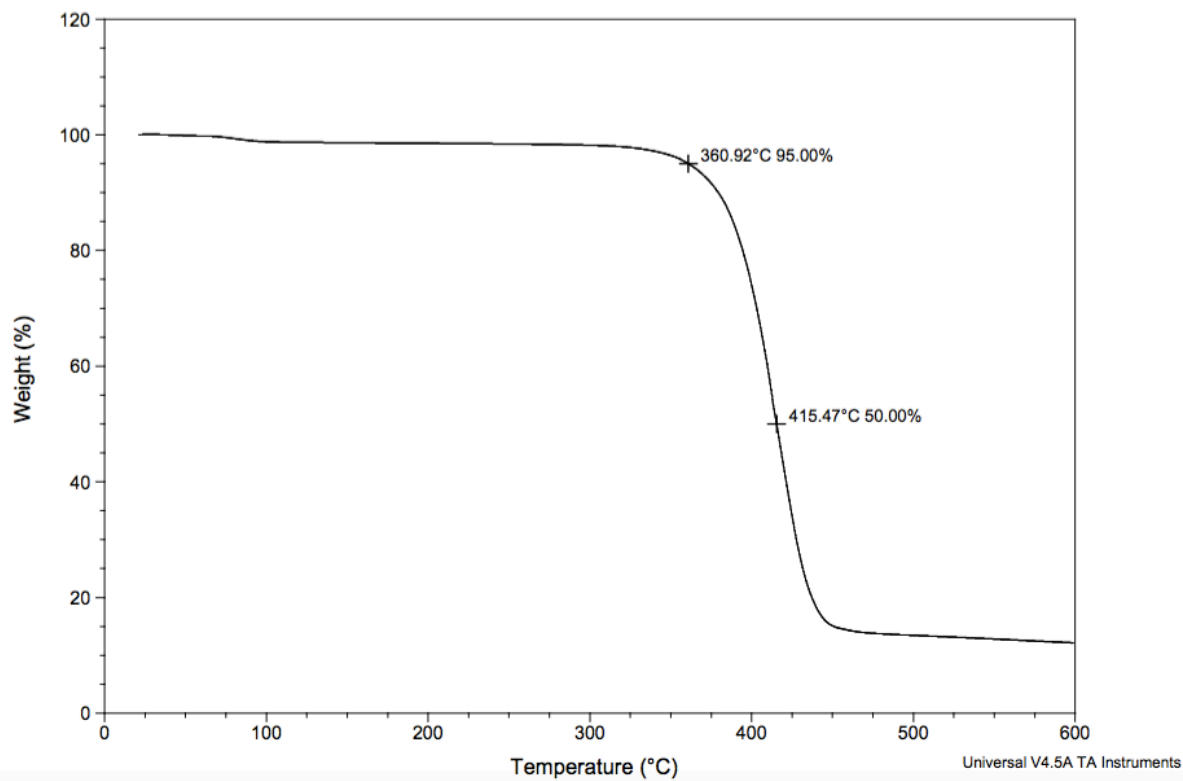

**Figure S59.** TGA thermogram for poly(BHEC/BHET) with 10% BHEC (Table S2, Entry 10)

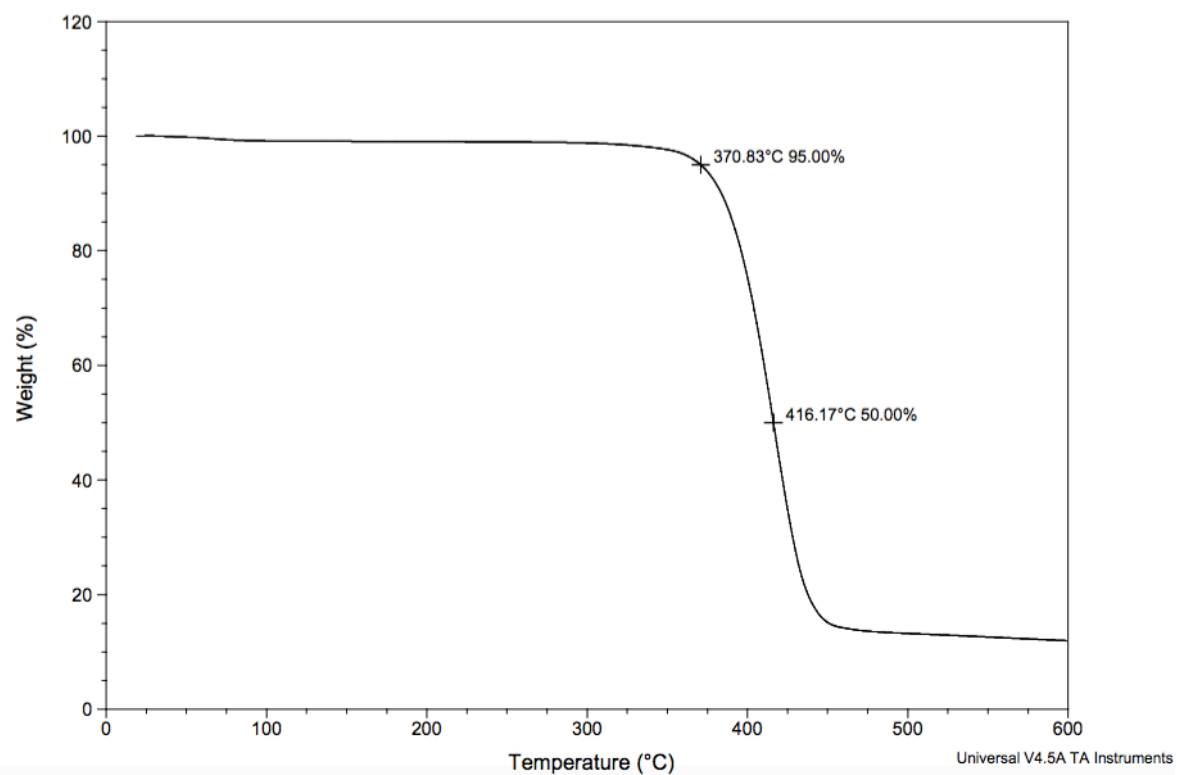

**Figure S60.** TGA thermogram polyBHET (Table S2, Entry 11)

## $^1\text{H}$ NMR Data

### Monomers:

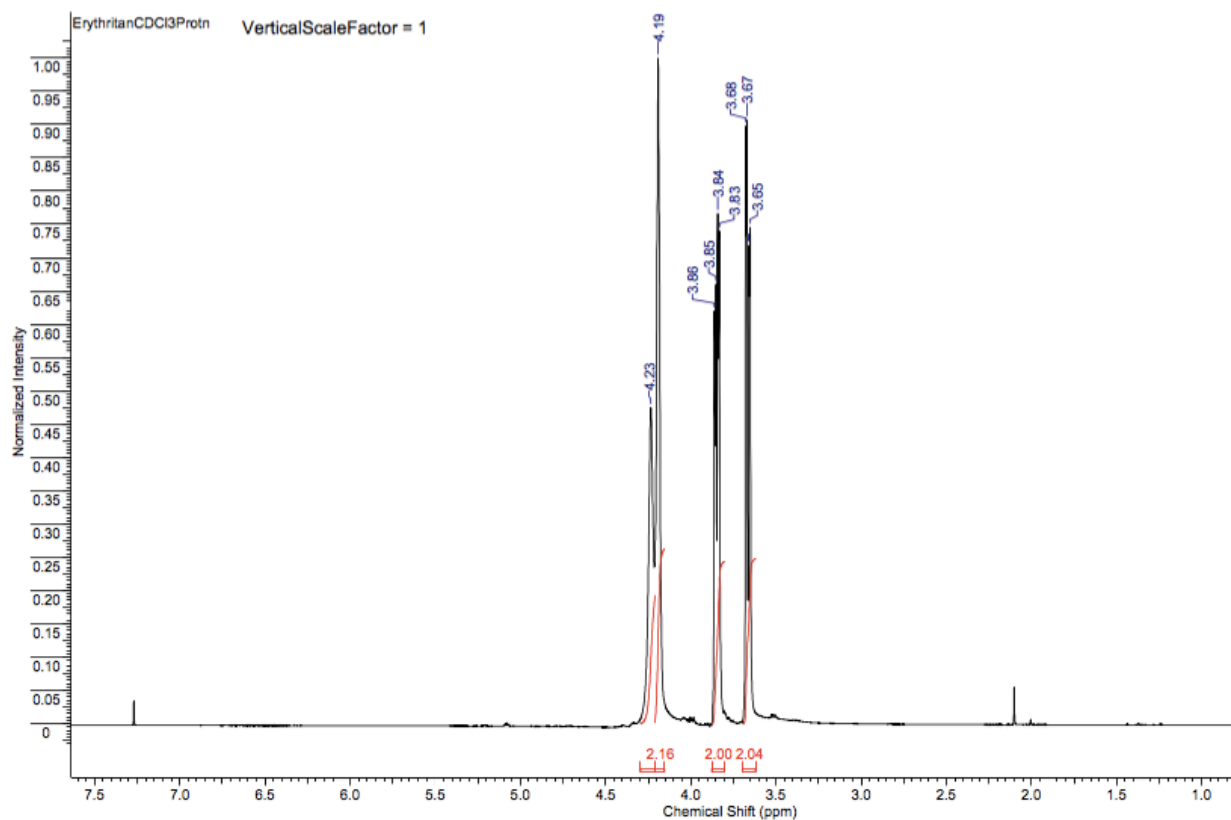

Figure S61.  $^1\text{H}$  NMR of erythritan monomer

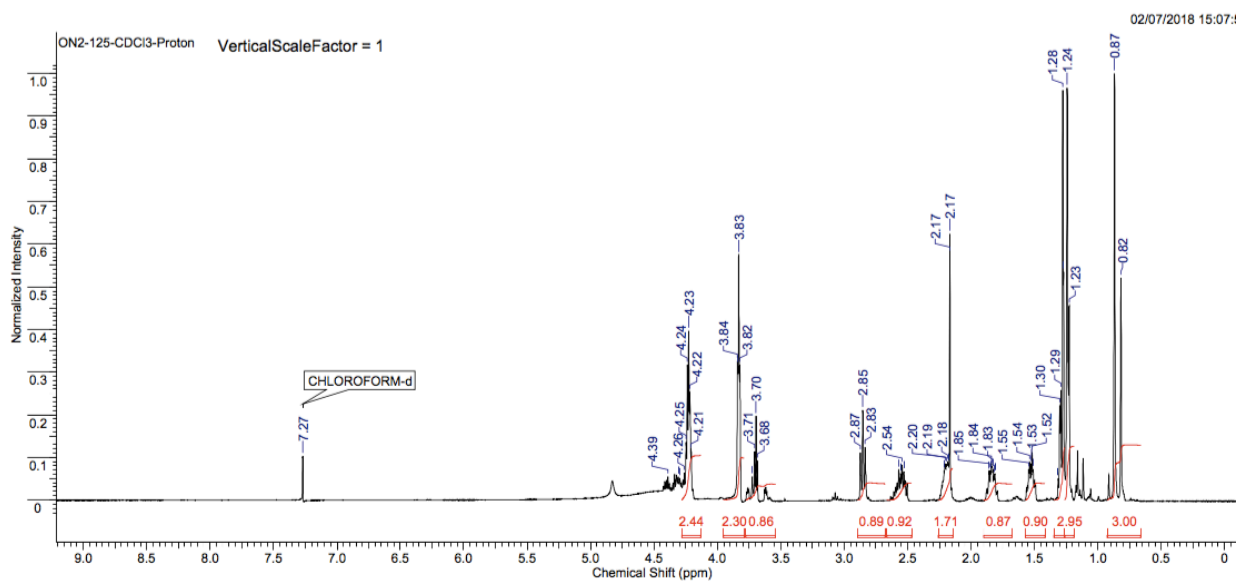

Figure S62.  $^1\text{H}$  NMR of bis(2-hydroxyethyl) camphorate (BHEC) monomer



## Polymers:

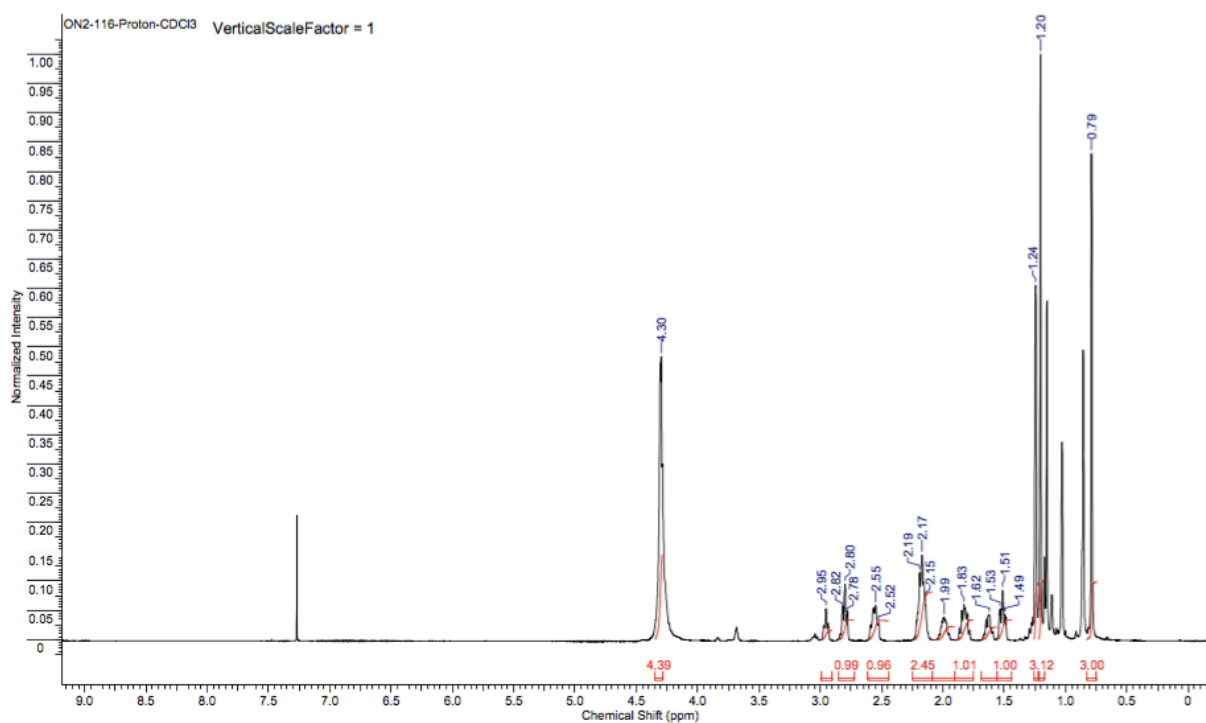

**Figure S63.**  $^1\text{H}$  NMR of polyethylene camphorate (Table S1, Entry 1)

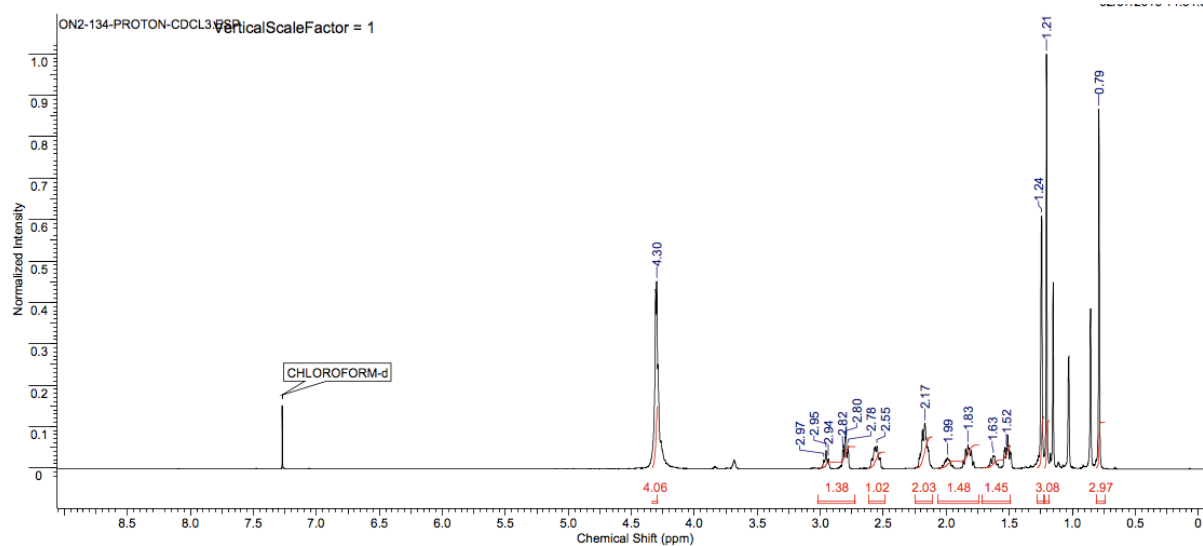

**Figure S64.**  $^1\text{H}$  NMR of polyethylene camphorate [dual catalyst] (Table S1, Entry 2)

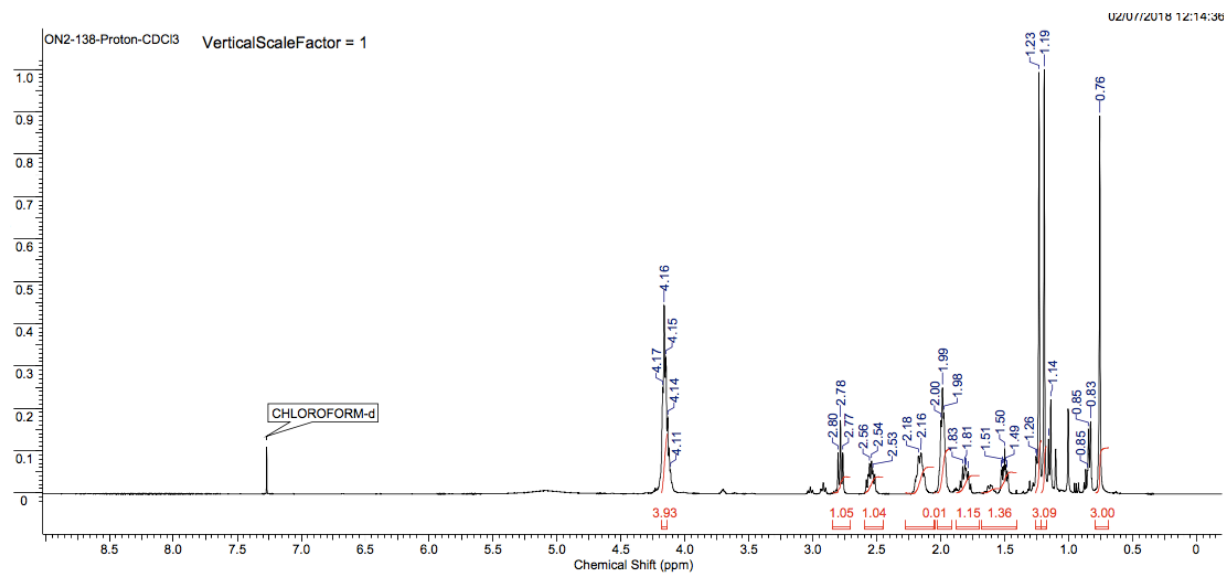

**Figure S65.**  $^1\text{H}$  NMR of polypropylene camphorate (Table S1, Entry 3)

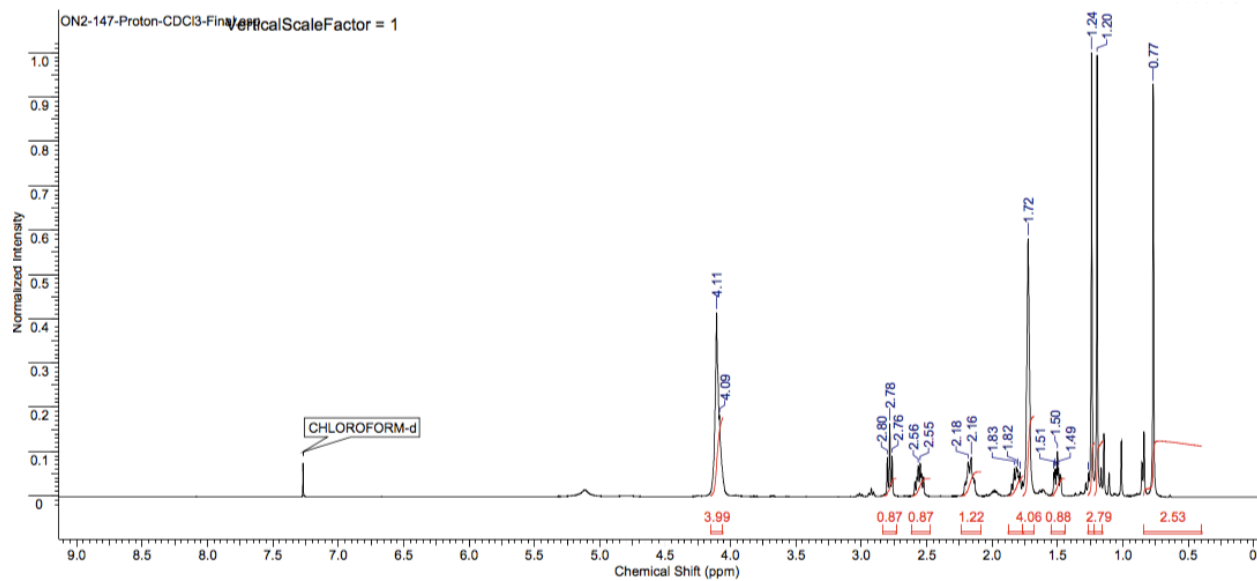

**Figure S66.**  $^1\text{H}$  NMR of polybutylene camphorate (Table S1, Entry 4)

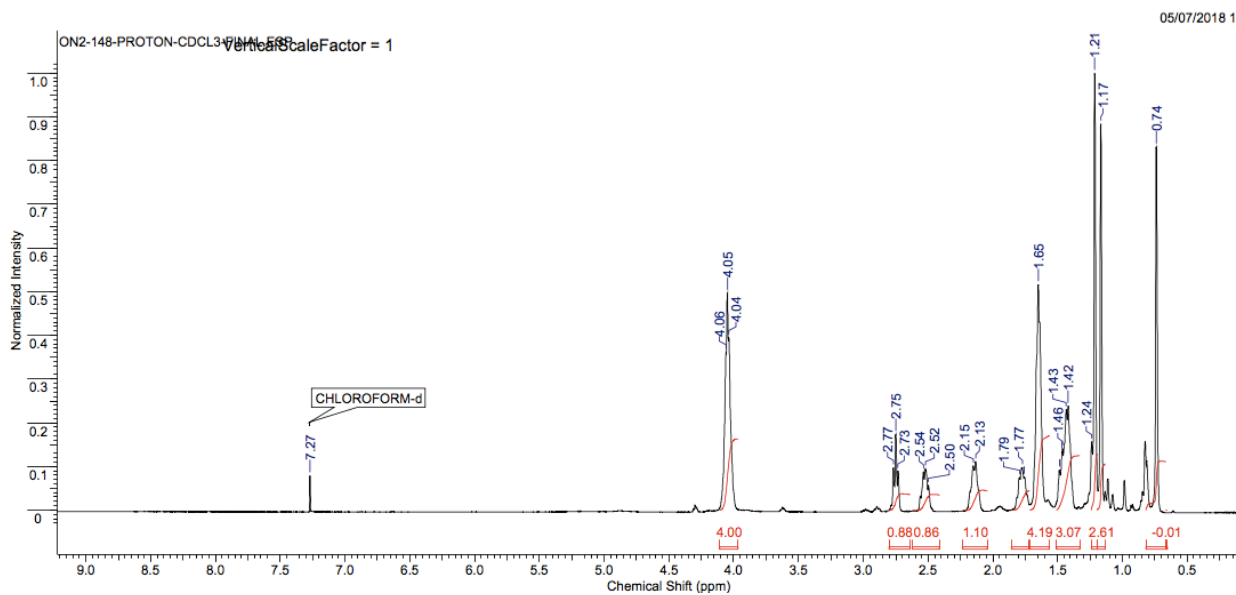

**Figure S67.**  $^1\text{H}$  NMR of polypentylene camphorate (Table S1, Entry 5)

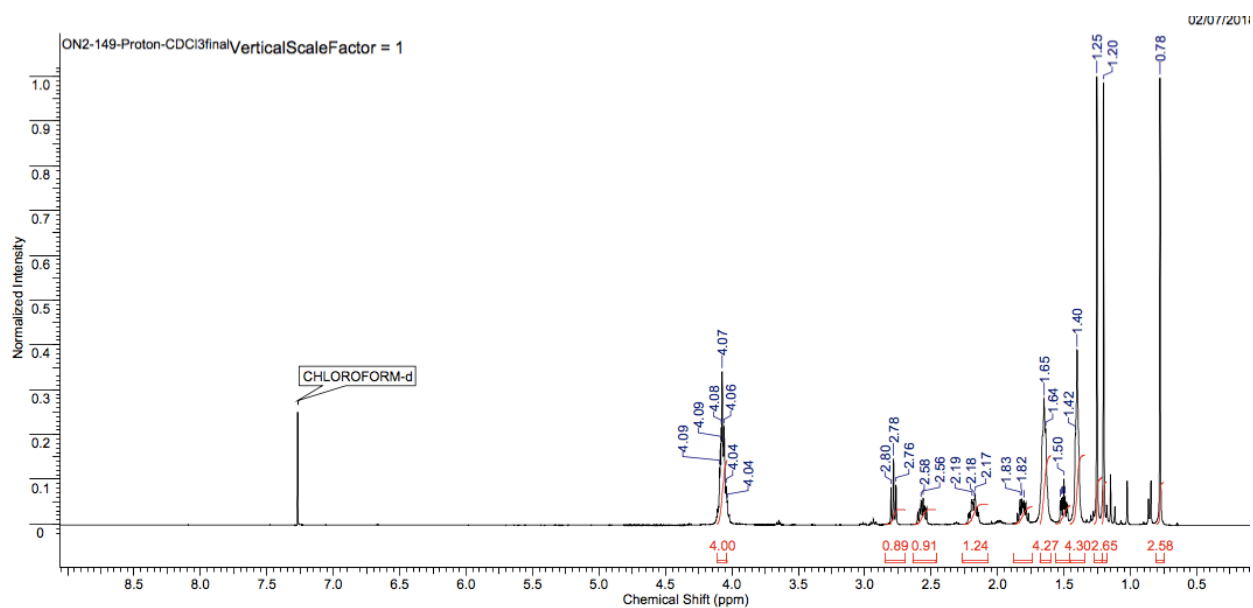

**Figure S68.**  $^1\text{H}$  NMR of polyhexylene camphorate (Table S1, Entry 6)

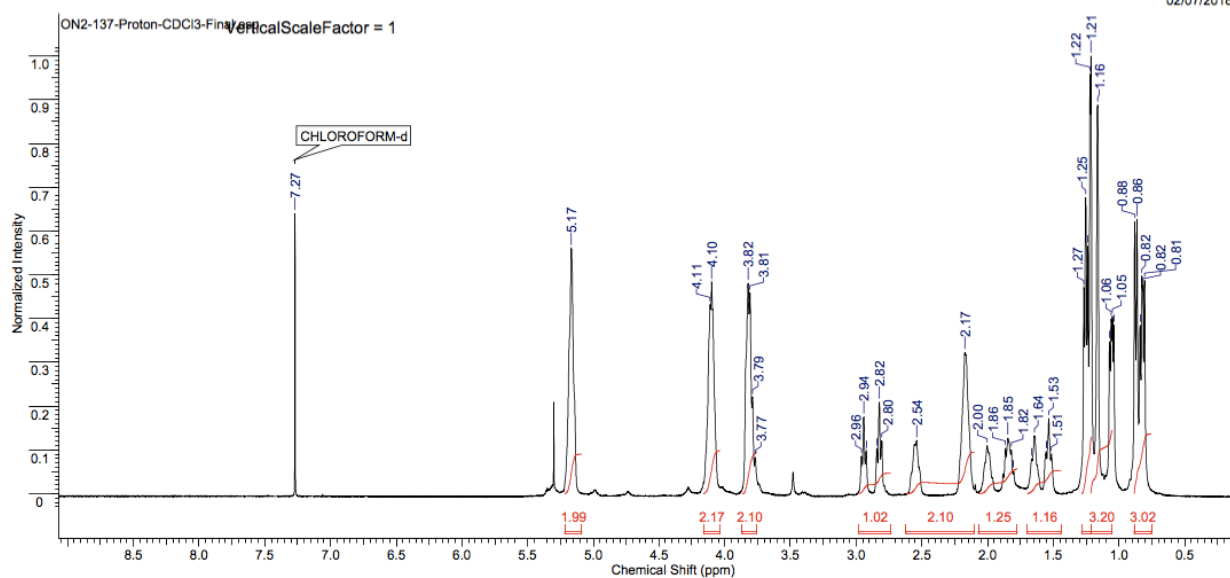

**Figure S69.**  $^1\text{H}$  NMR of polyerythritan camphorate (Table S1, Entry 7)

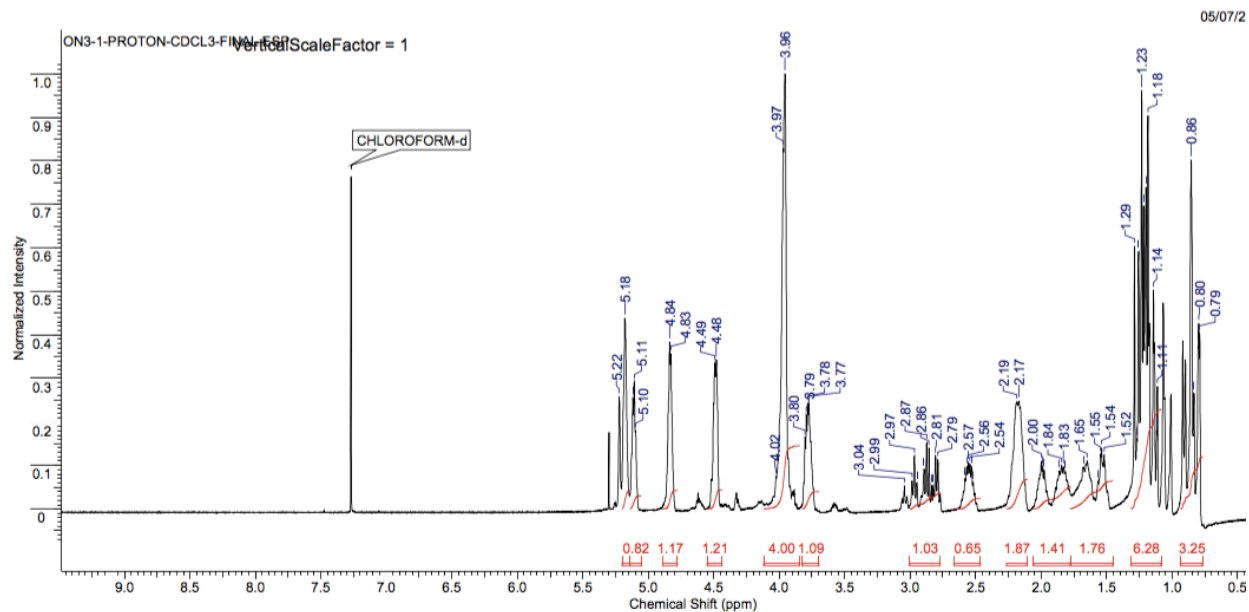

**Figure S70.**  $^1\text{H}$  NMR of polyisobutide camphorate (Table S1, Entry 8)

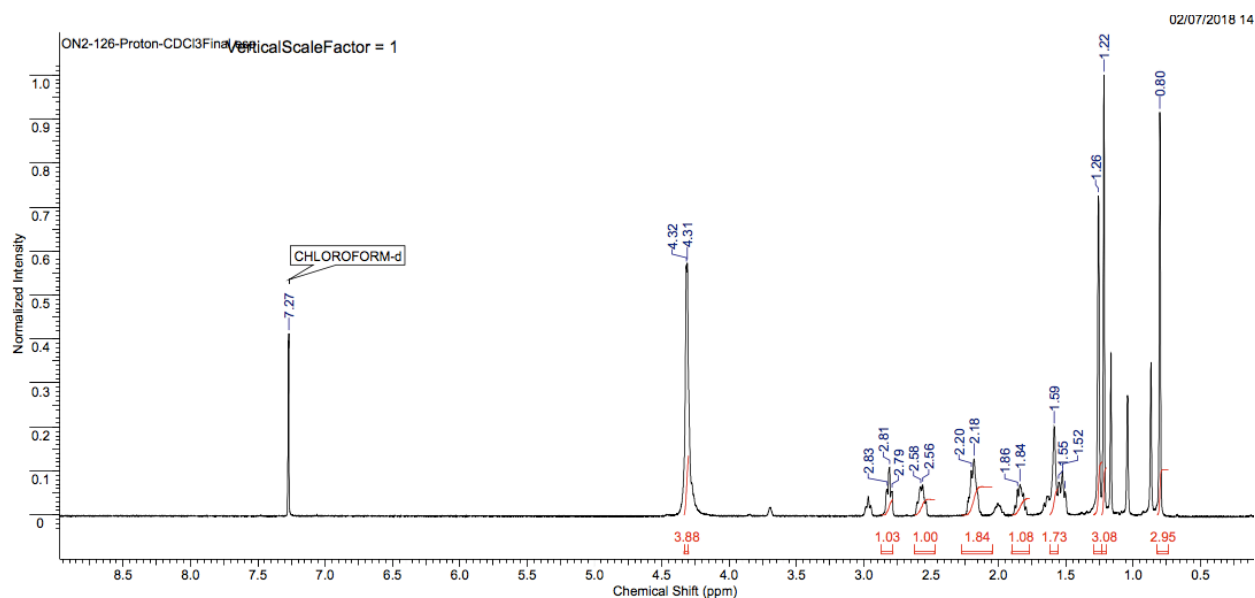

**Figure S71.**  $^1\text{H}$  NMR of polyBHEC (Table S2, Entry 1)

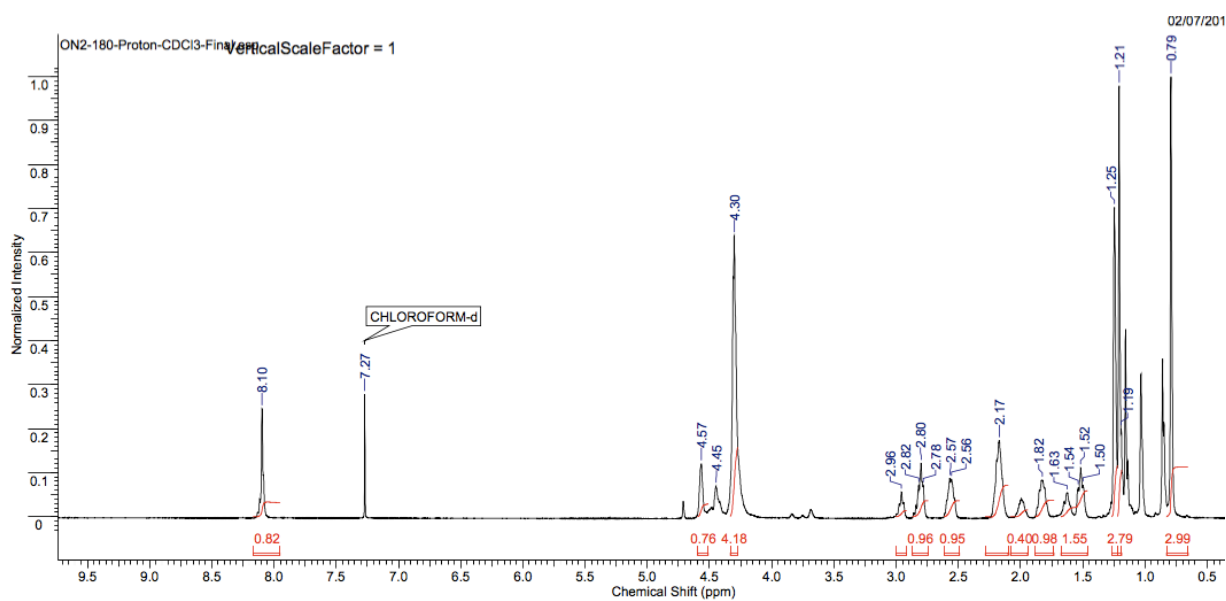

**Figure S72.**  $^1\text{H}$  NMR of poly(BHEC/BHET) with 90% BHEC (Table S2, Entry 2)

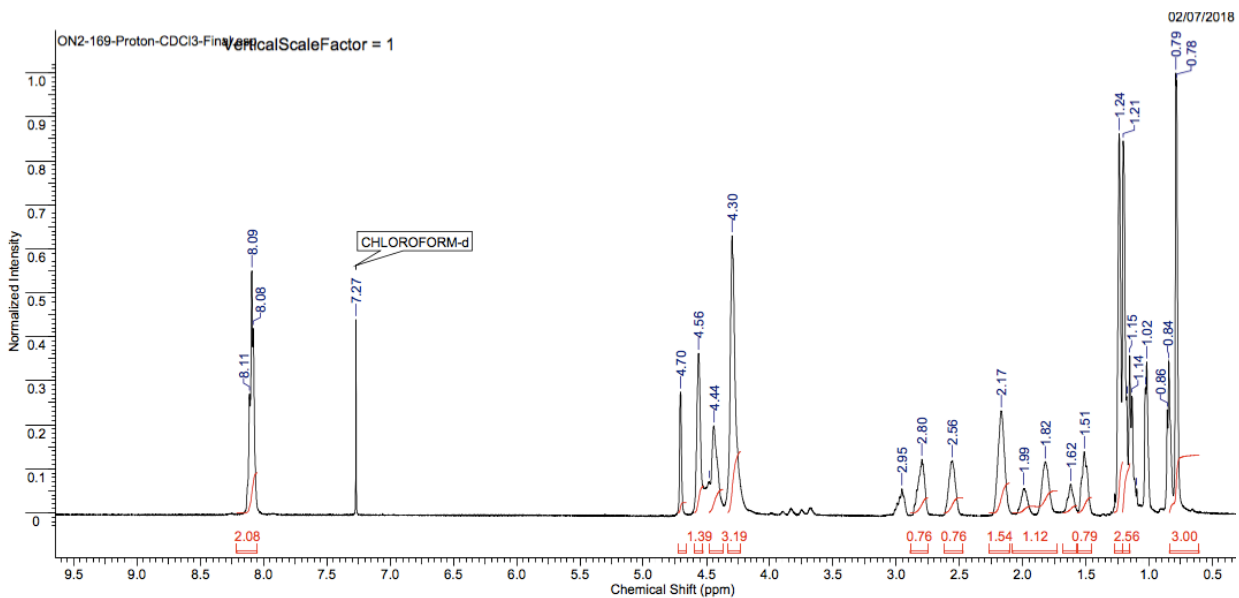

**Figure S73.**  $^1\text{H}$  NMR of poly(BHEC/BHET) with 80% BHEC (Table S2, Entry 3)

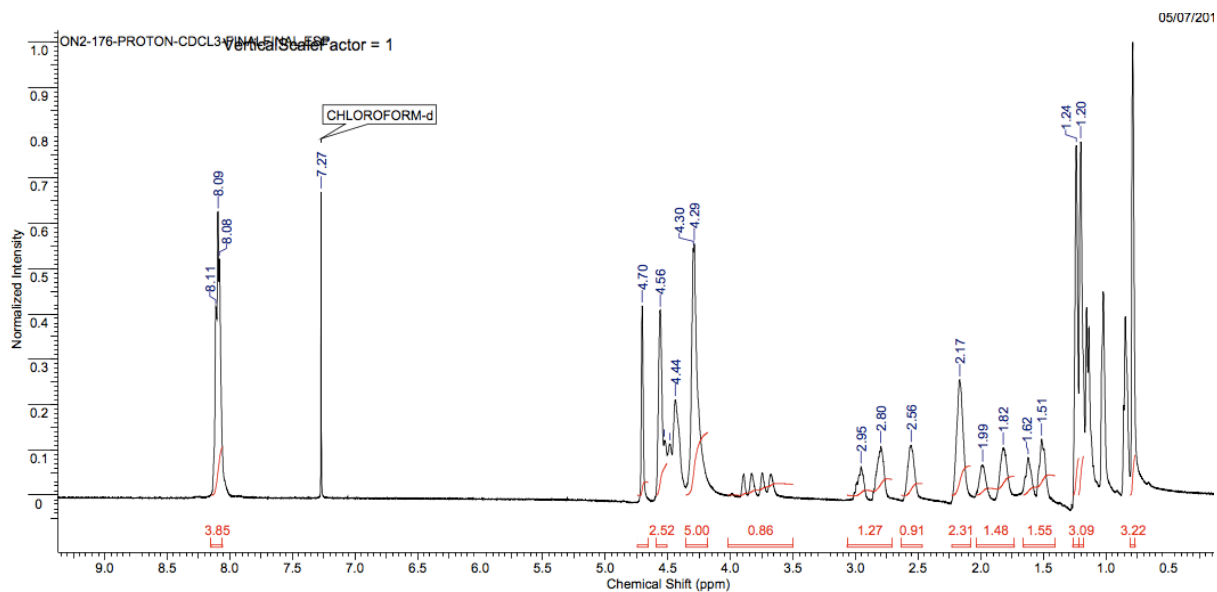

**Figure S74.**  $^1\text{H}$  NMR of poly(BHEC/BHET) with 70% BHEC Table (S2, Entry 4)

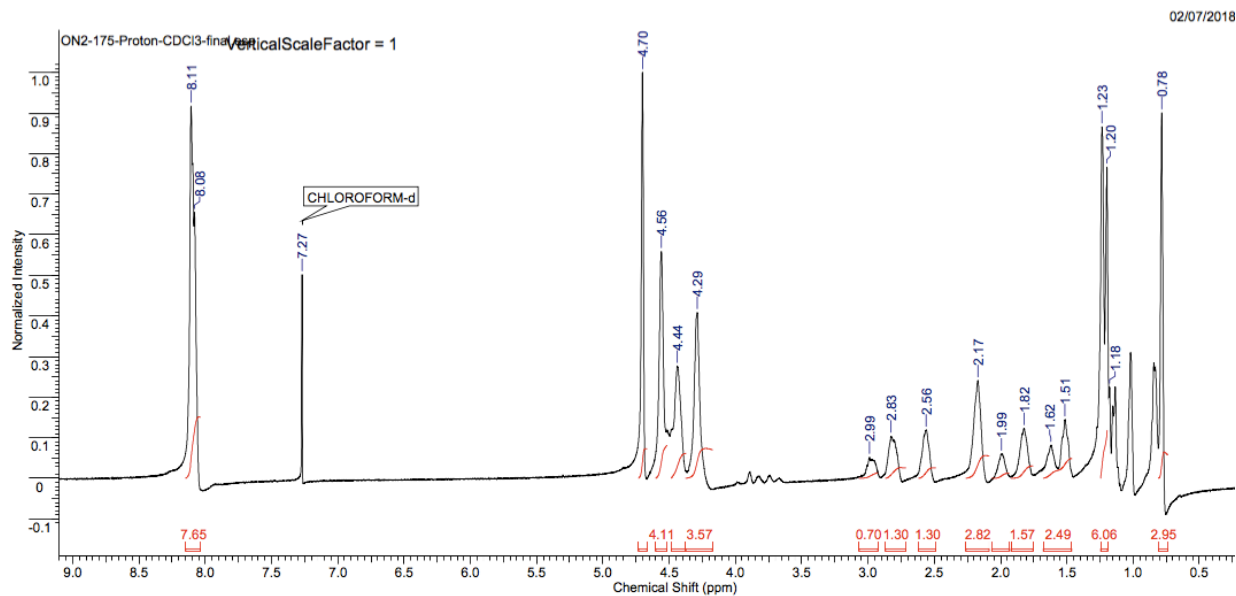

**Figure S75.**  $^1\text{H}$  NMR of poly(BHEC/BHET) with 60% BHEC (Table S2, Entry 5)

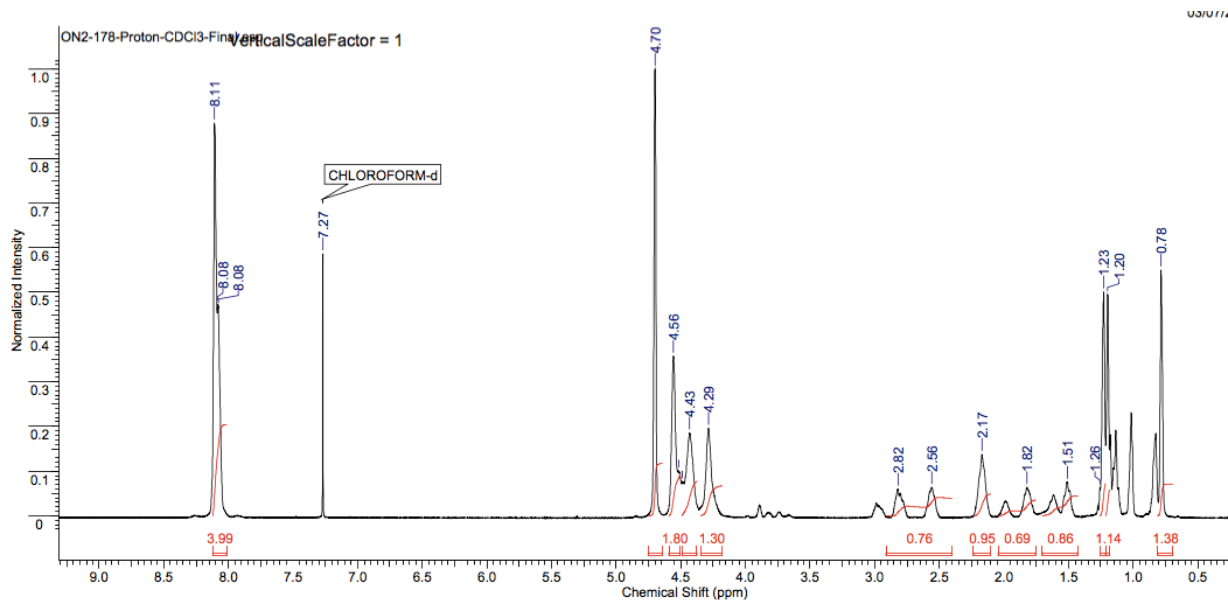

**Figure S76.**  $^1\text{H}$  NMR of poly(BHEC/BHET) with 50% BHEC (Table S2, Entry 6)

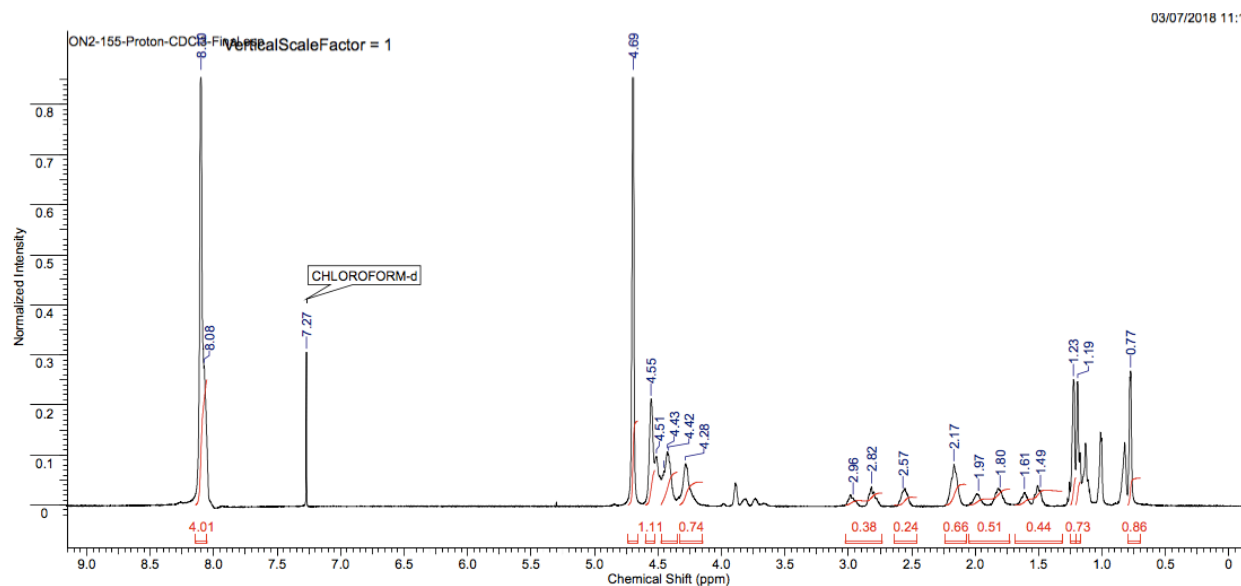

**Figure S77.**  $^1\text{H}$  NMR of poly(BHEC/BHET) with 40% BHEC (Table S2, Entry 7)

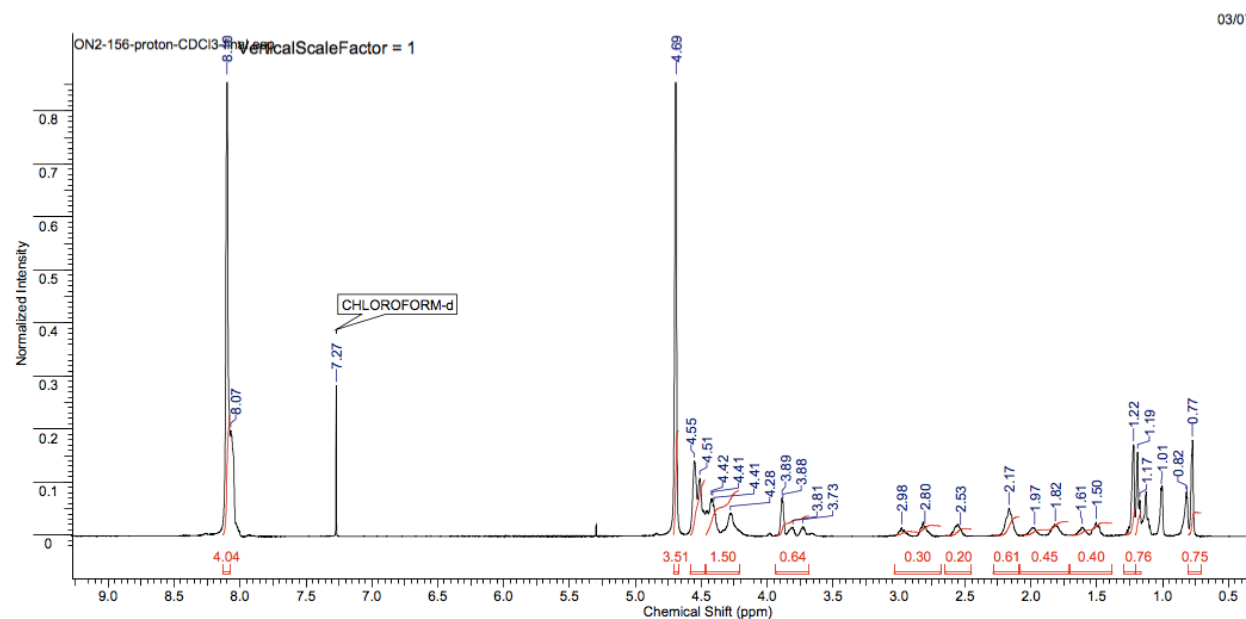

**Figure S78.**  $^1\text{H}$  NMR of poly(BHEC/BHET) with 30% BHEC (Table S2, Entry 8)



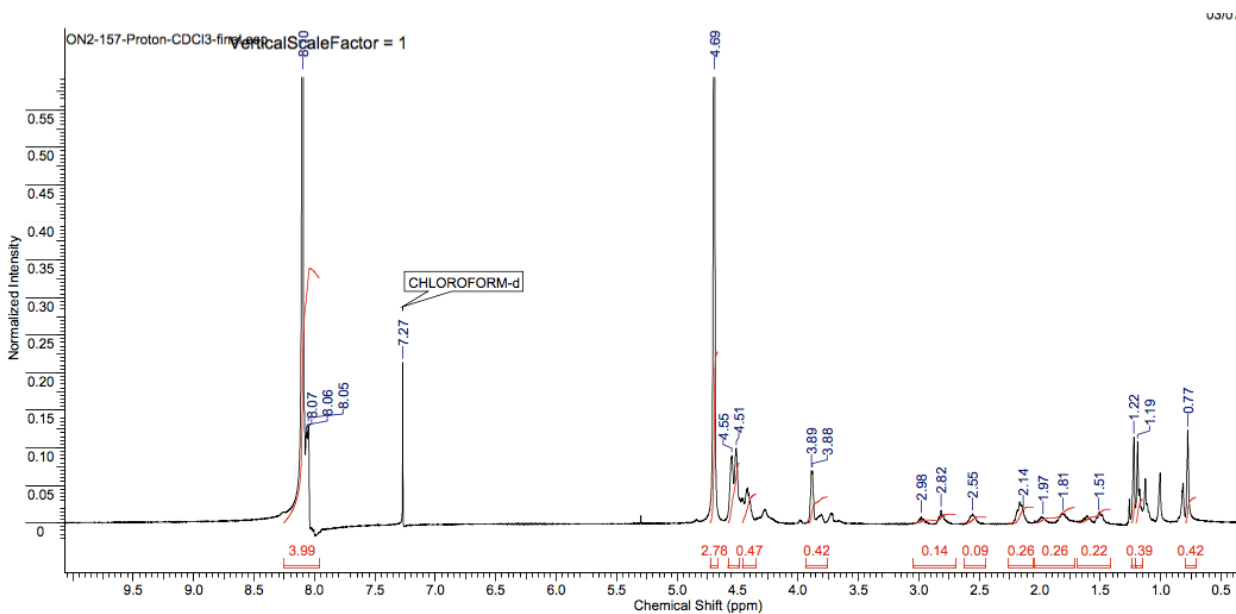

**Figure S79.**  $^1\text{H}$  NMR of poly(BHEC/BHET) with 20% BHEC (Table S2, Entry 9)

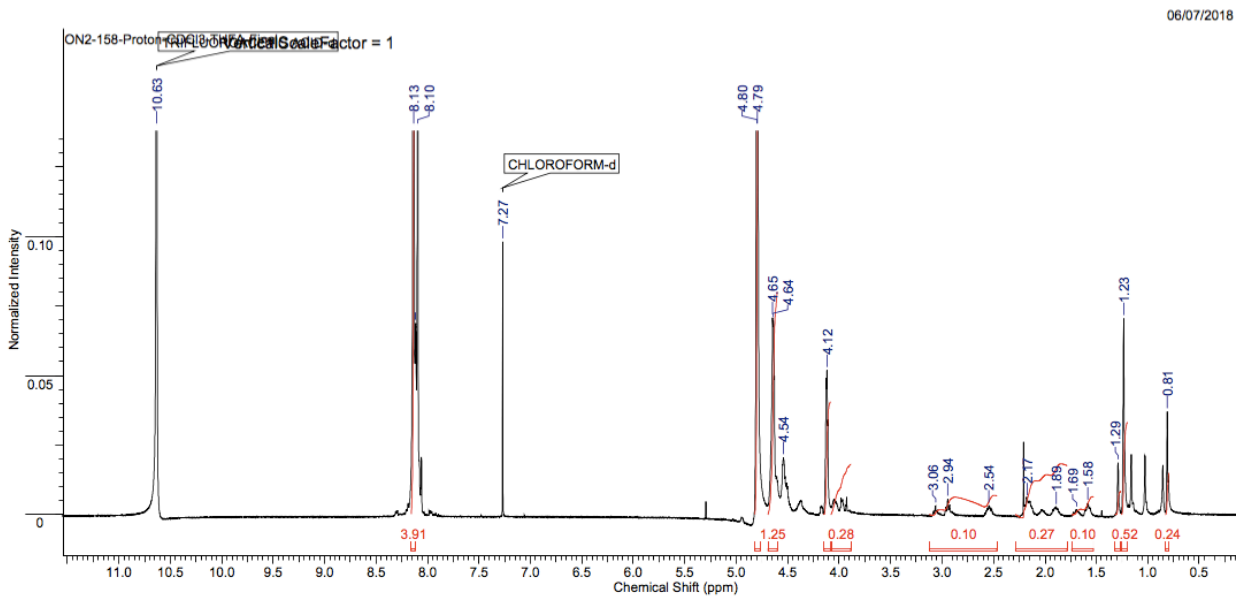

**Figure S80.**  $^1\text{H}$  NMR of poly(BHEC/BHET) with 10% BHEC (Table S2, Entry 10)

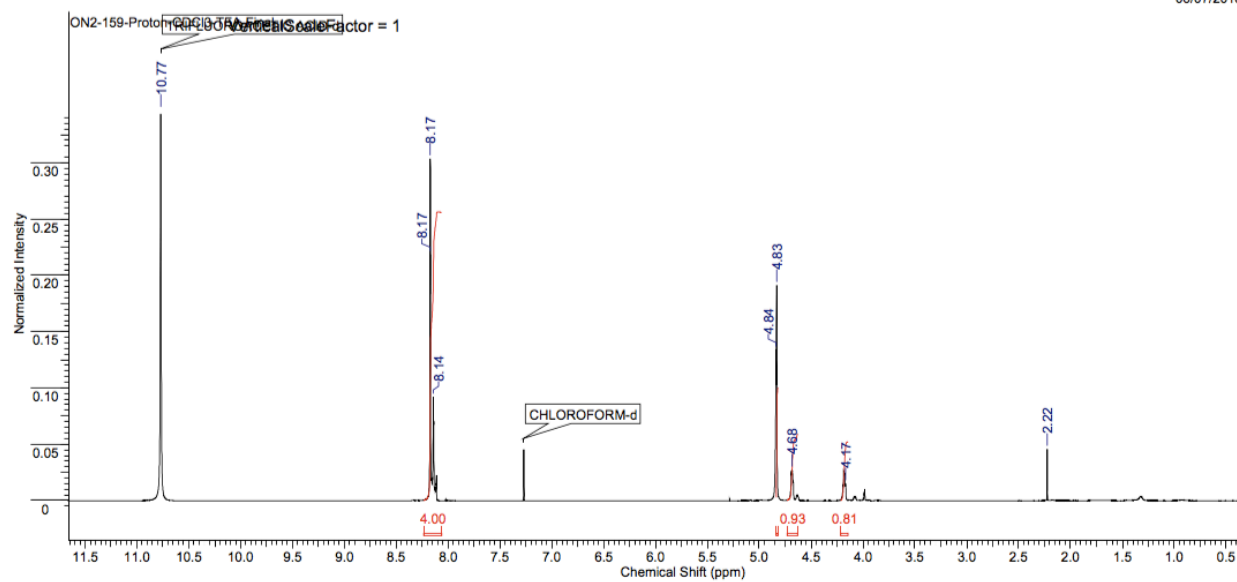

**Figure S81.**  $^1\text{H}$  NMR of polyBHET (Table S2, Entry 11)

## $^{13}\text{C}$ NMR Data

### Monomers:

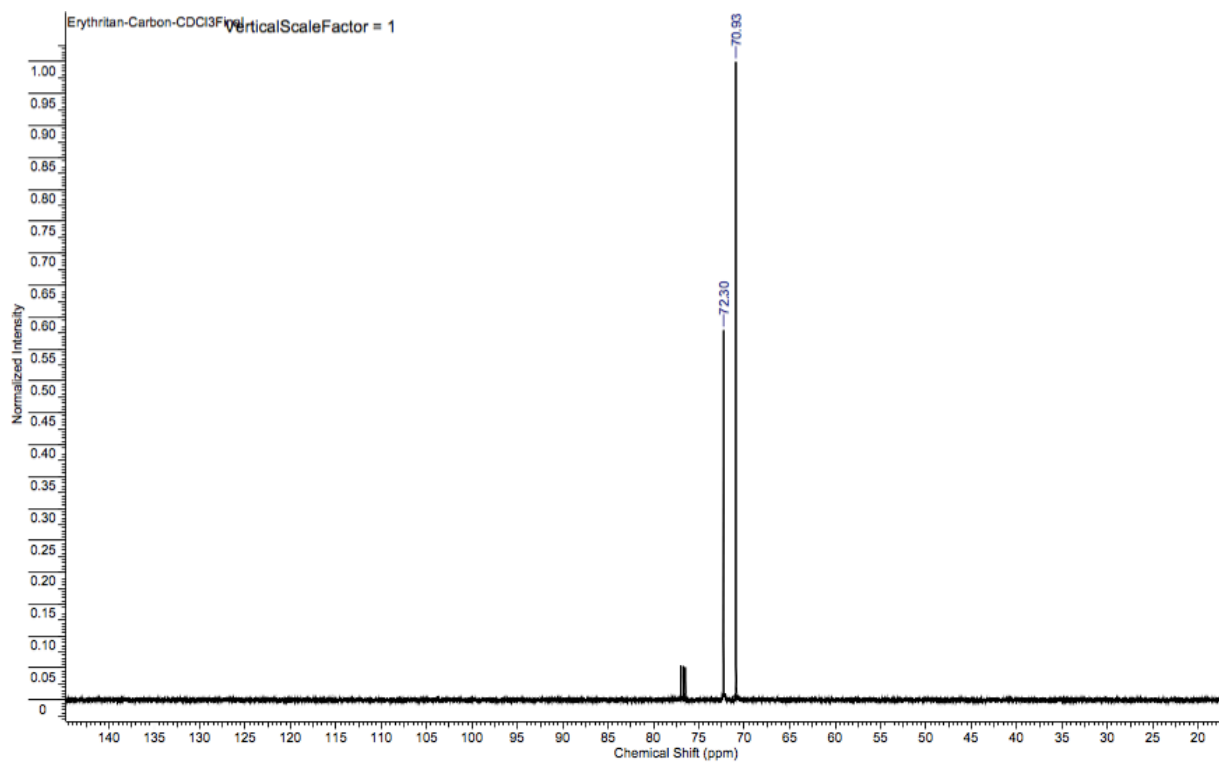

Figure S82.  $^{13}\text{C}$  NMR of erythritan monomer

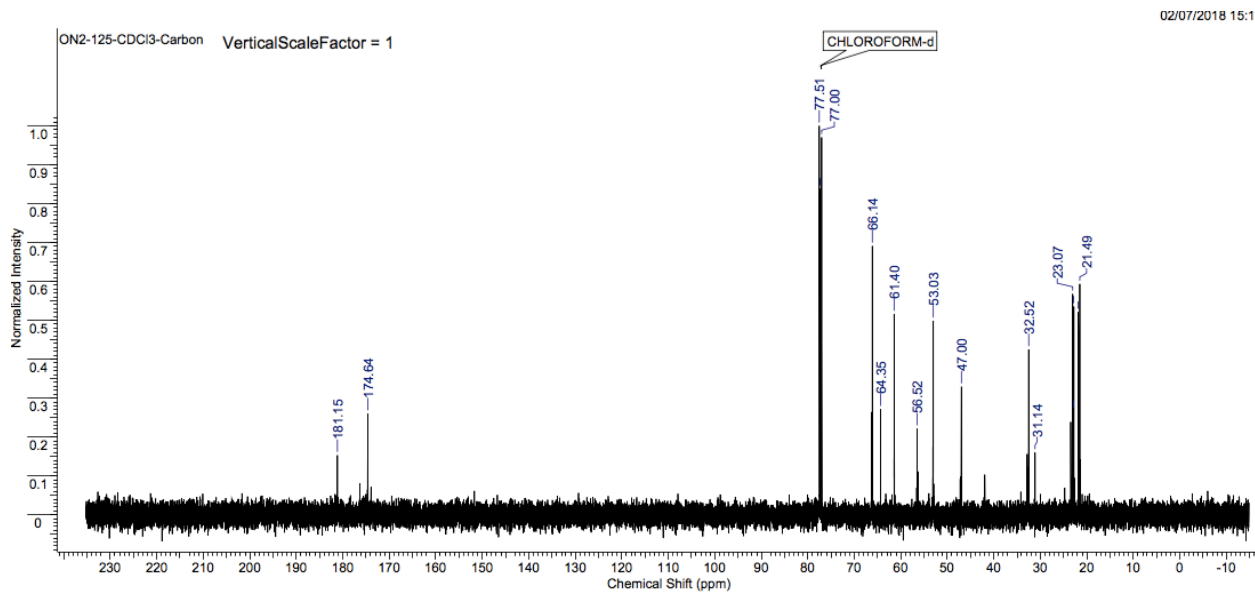

Figure S83.  $^{13}\text{C}$  NMR of bis(2-hydroxyethyl) camphorate (BHEC) monomer

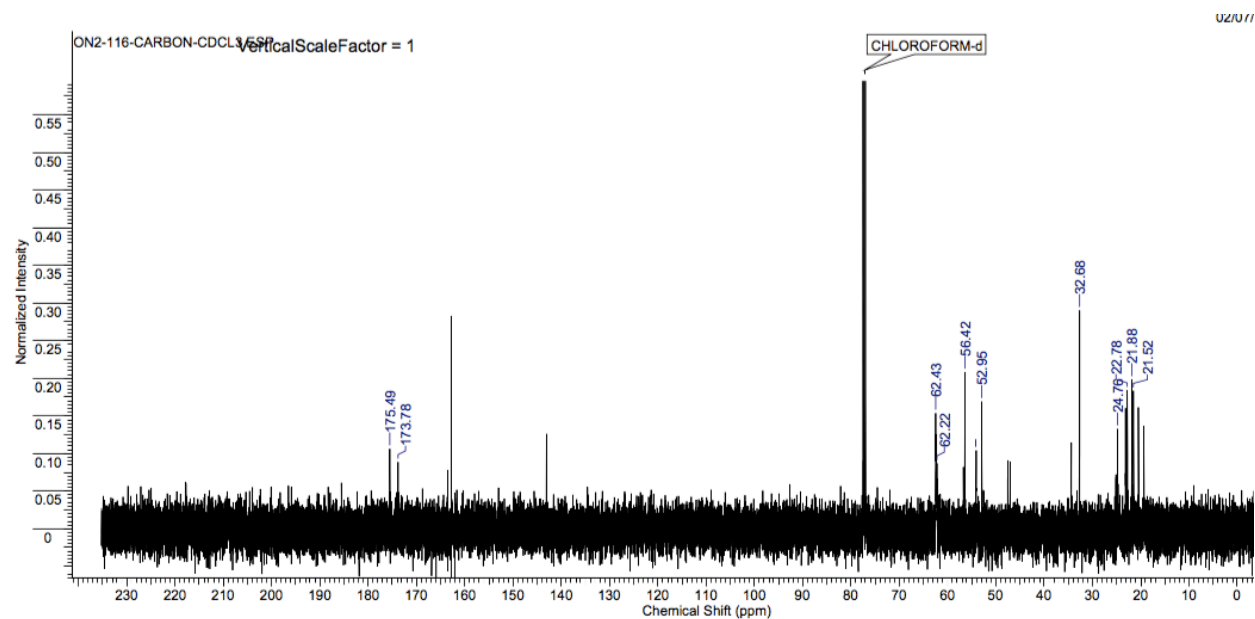

**Figure S84.**  $^{13}\text{C}$  NMR of polyethylene camphorate (Table S1, Entry 1)

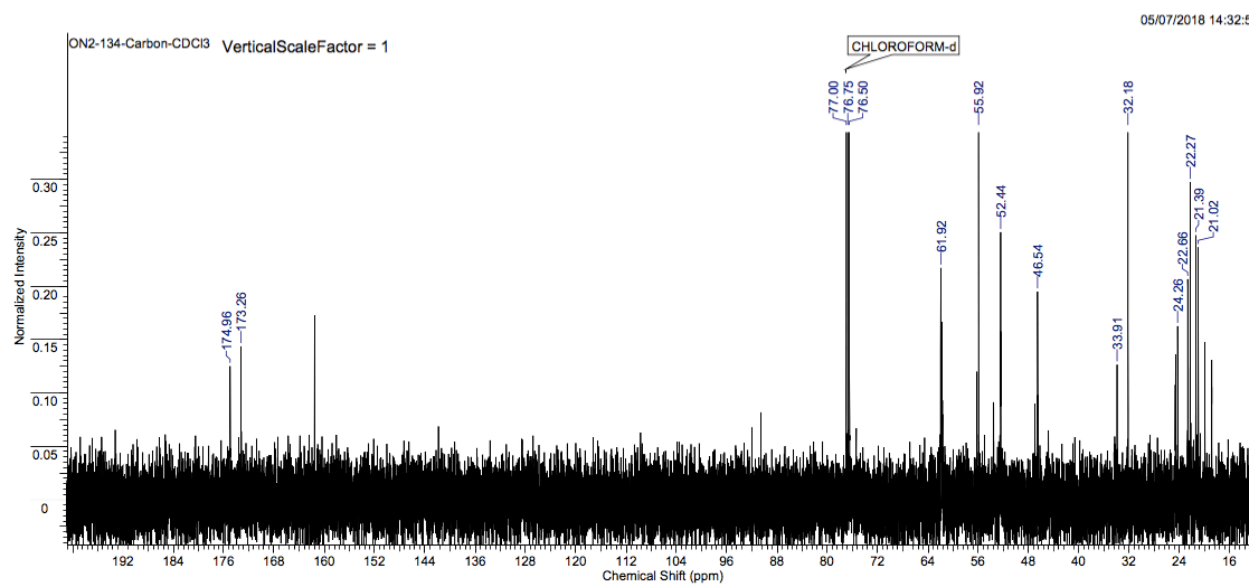

**Figure S85.**  $^{13}\text{C}$  NMR of polyethylene camphorate [dual catalyst] (Table S1, Entry 2)

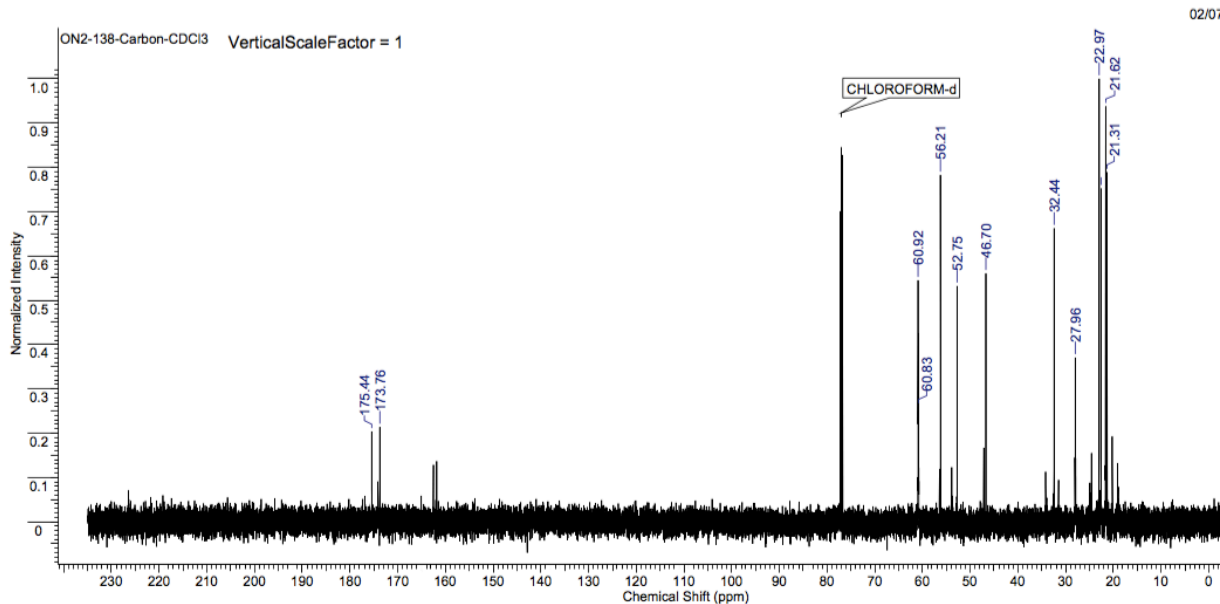

**Figure S86.**  $^{13}\text{C}$  NMR of polypropylene camphorate (Table S1, Entry 3)

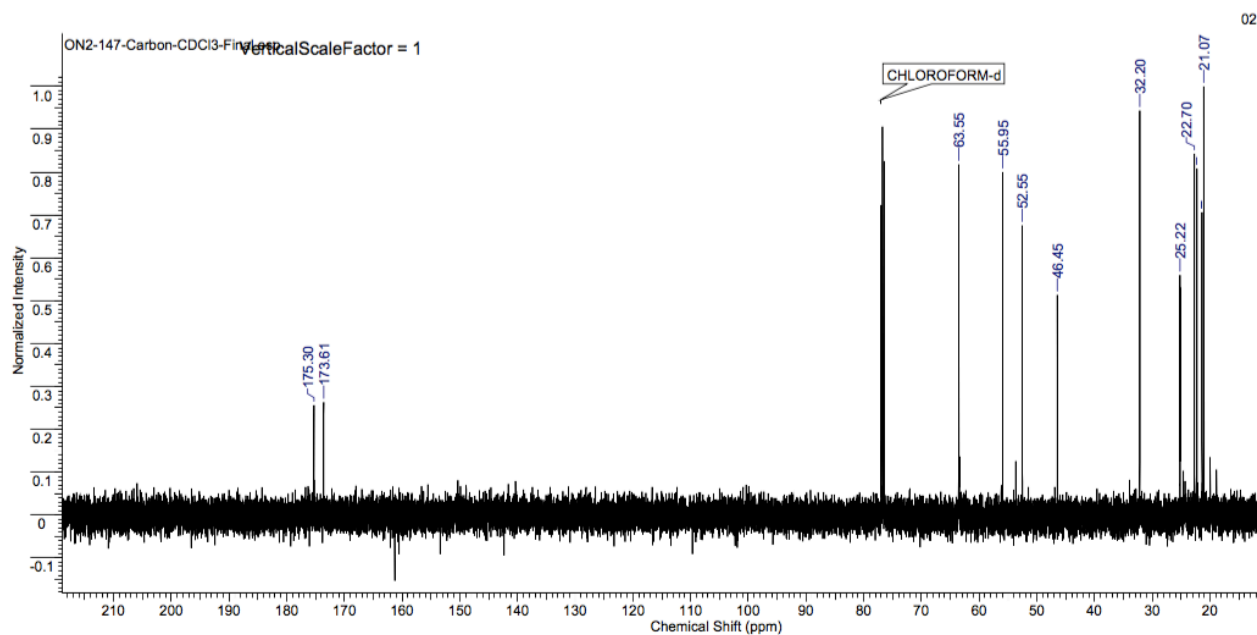

**Figure S87.**  $^{13}\text{C}$  NMR of polybutylene camphorate (Table S1, Entry 4)

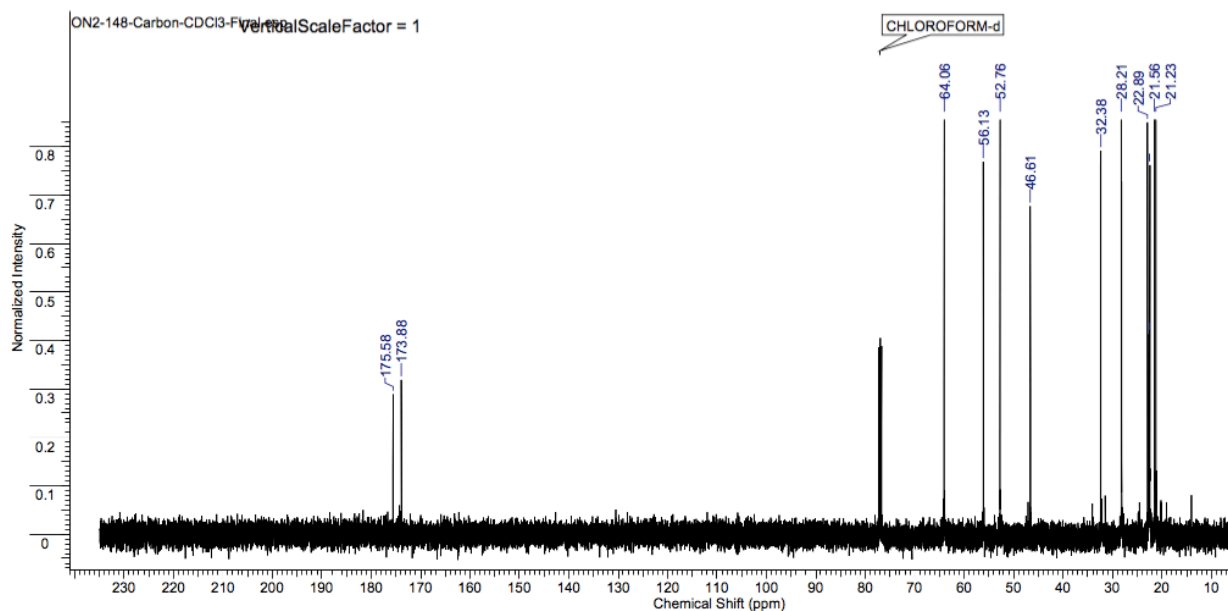

**Figure S88.**  $^{13}\text{C}$  NMR of polypentylene camphorate (Table S1, Entry 5)

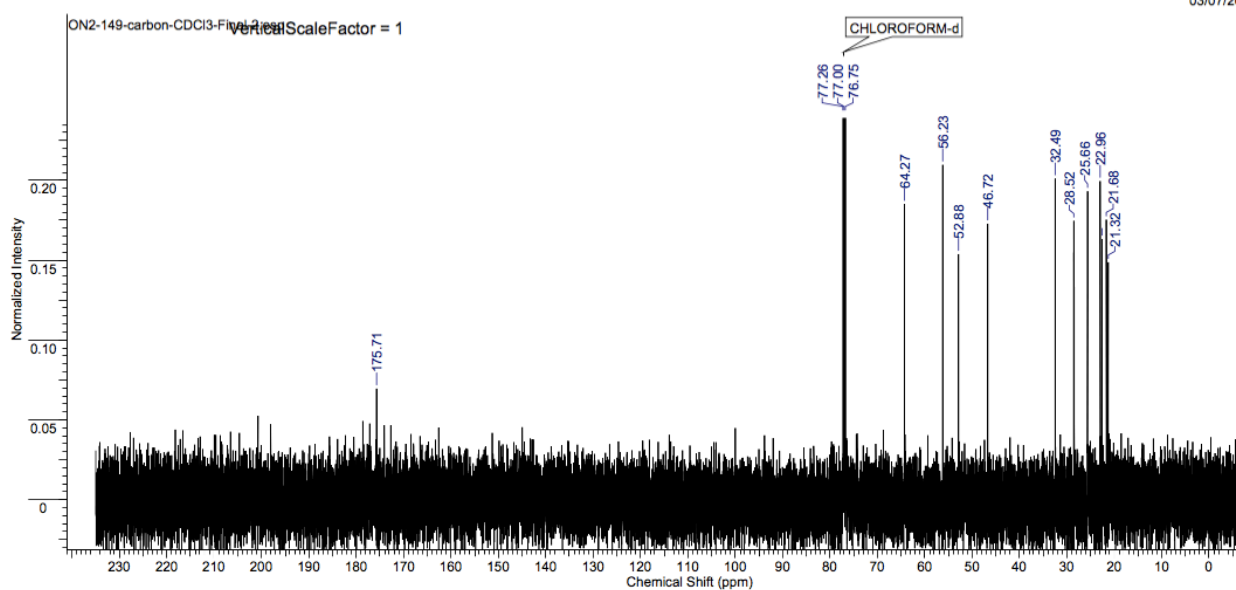

**Figure S89.**  $^{13}\text{C}$  NMR of polyhexylene camphorate (Table S1, Entry 6)

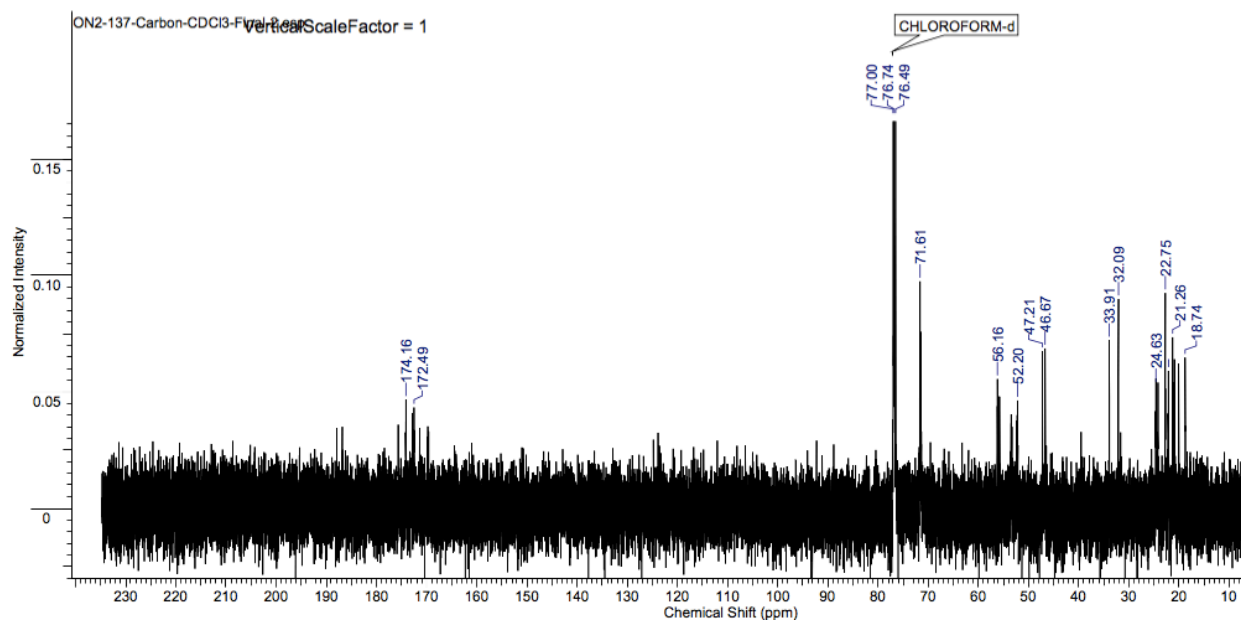

**Figure S90.**  $^{13}\text{C}$  NMR of polyerythritan camphorate (Table S1, Entry 7)

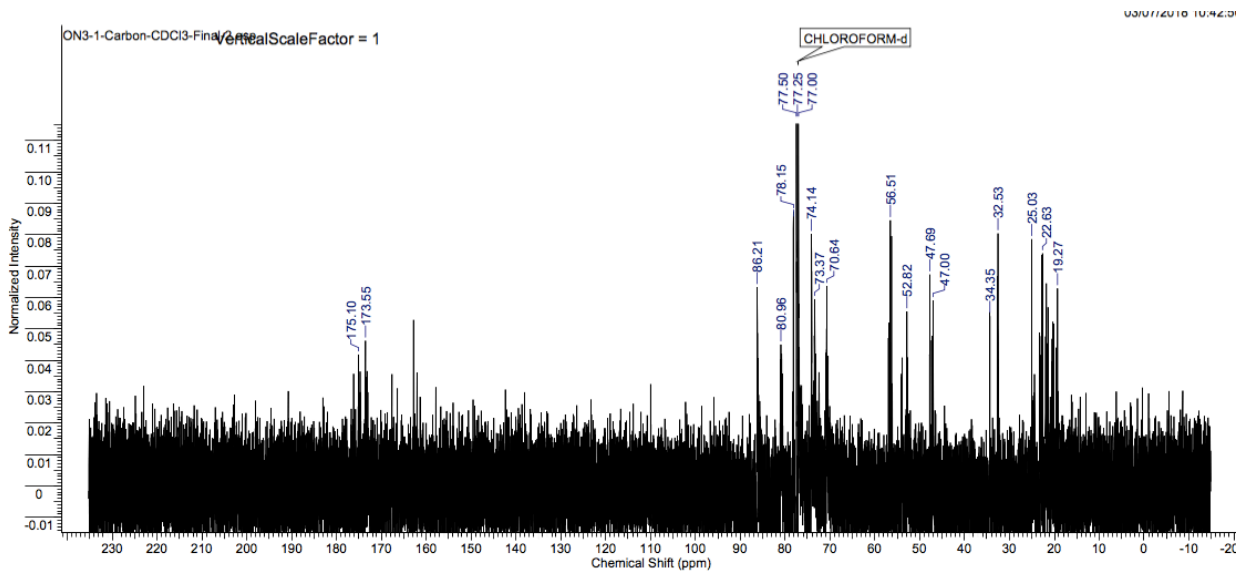

**Figure S91.**  $^{13}\text{C}$  NMR of polyisorbide camphorate (Table S1, Entry 8)

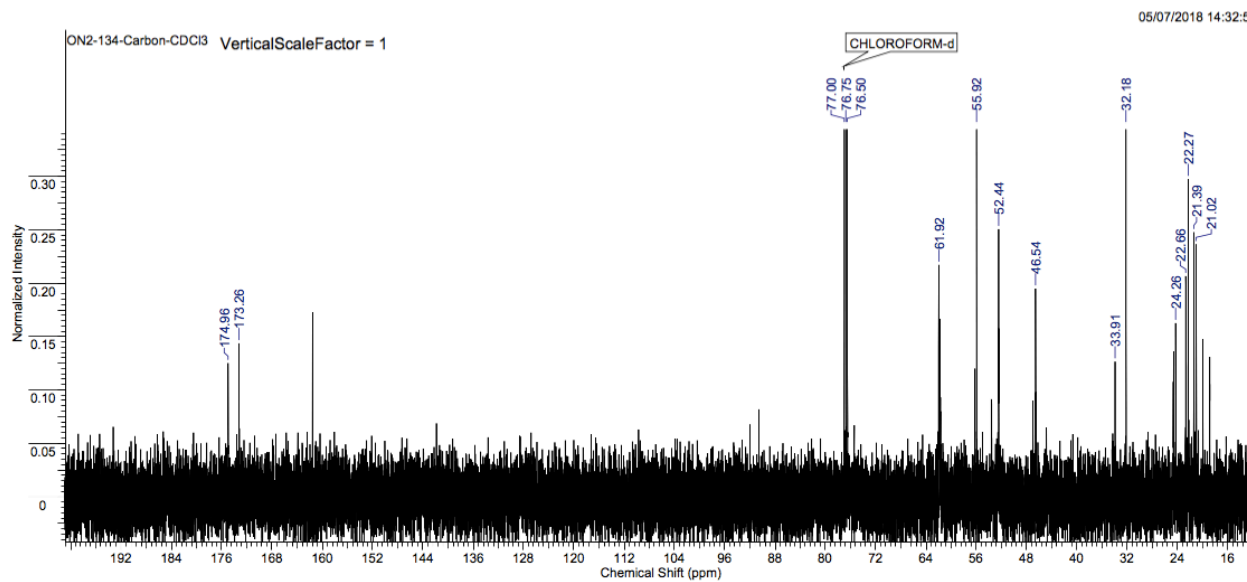

**Figure S92.**  $^{13}\text{C}$  NMR for polyBHEC (Table S2, Entry 1)

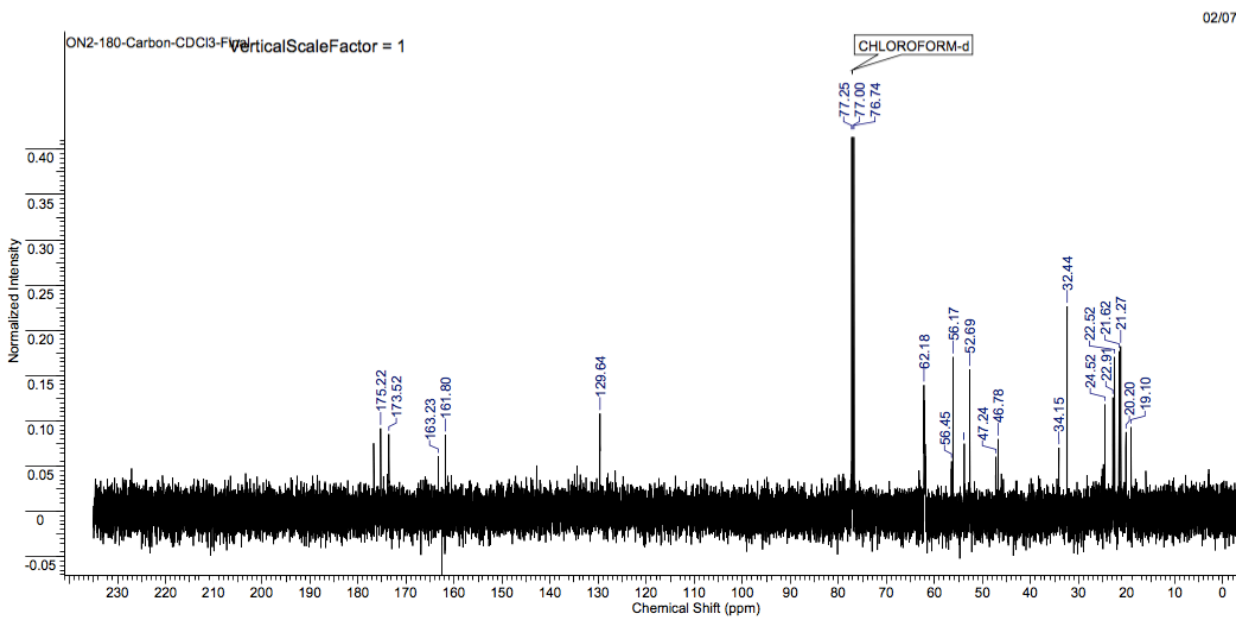

**Figure S93.**  $^{13}\text{C}$  NMR for poly(BHEC/BHET) with 90% BHEC (Table S2, Entry 2)



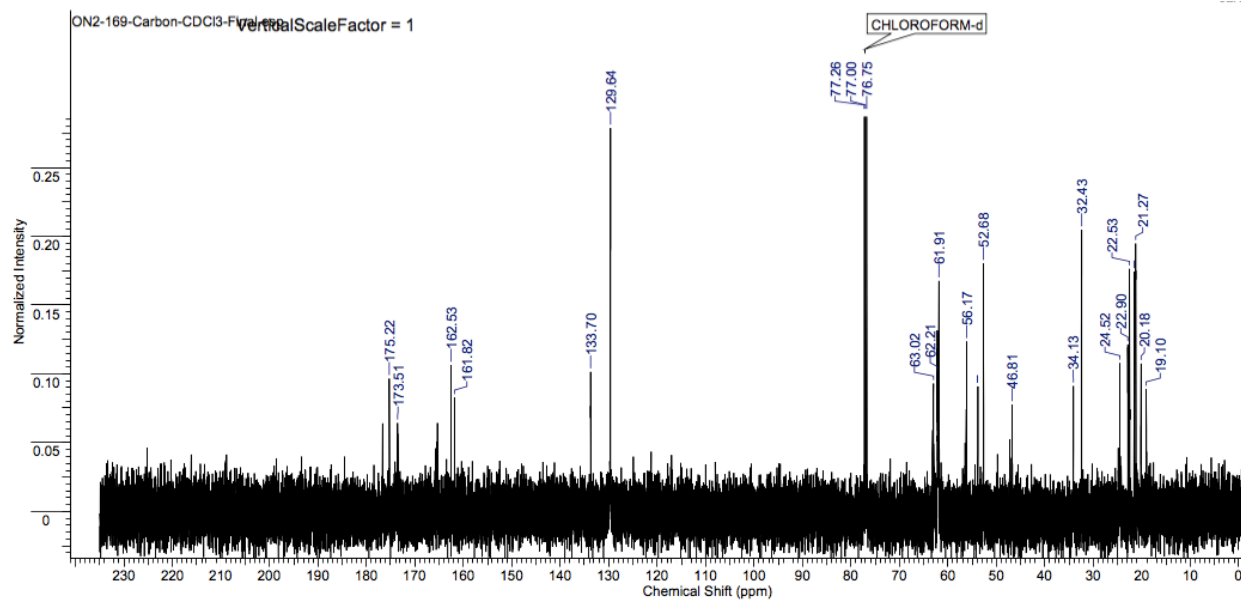

**Figure S94.**  $^{13}\text{C}$  NMR for poly(BHEC/BHET) with 80% BHEC (Table S2, Entry 3)

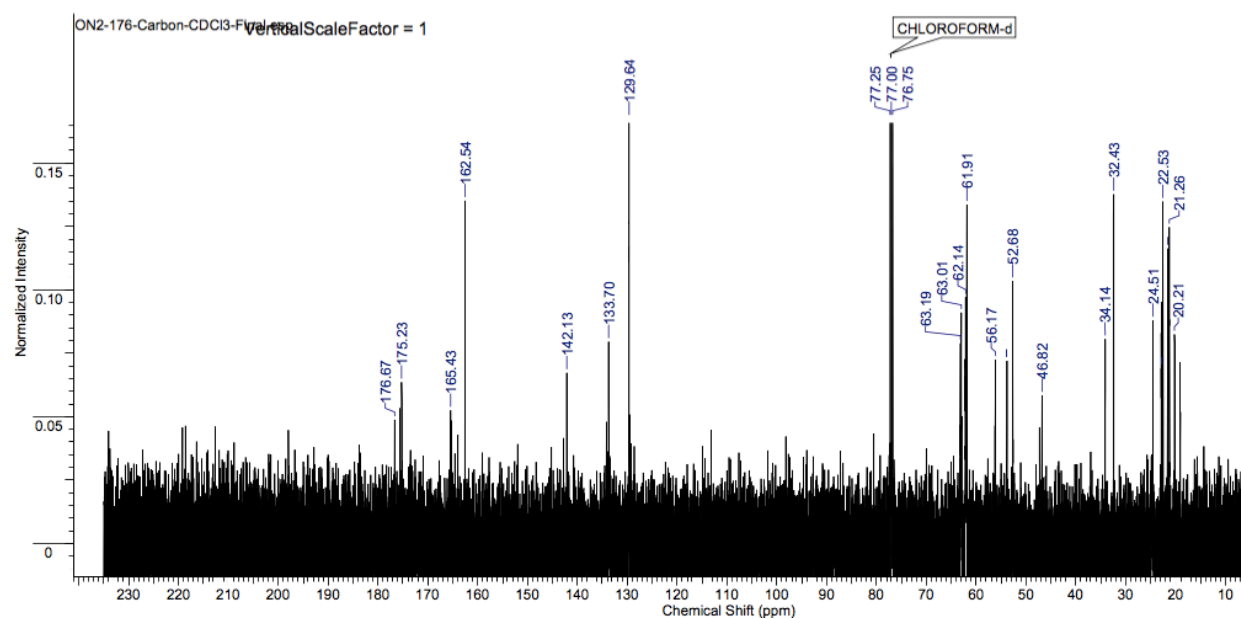

**Figure S95.**  $^{13}\text{C}$  NMR for poly(BHEC/BHET) with 70% BHEC (Table S2, Entry 4)

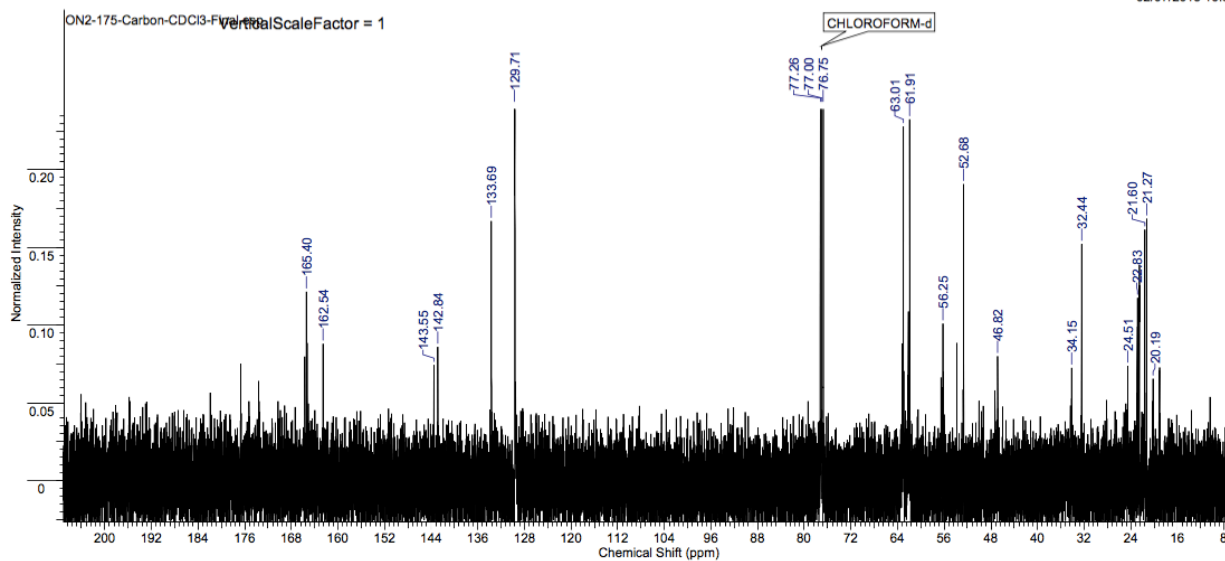

**Figure S96.**  $^{13}\text{C}$  NMR for poly(BHEC/BHET) with 60% BHEC (Table S2, Entry 5)

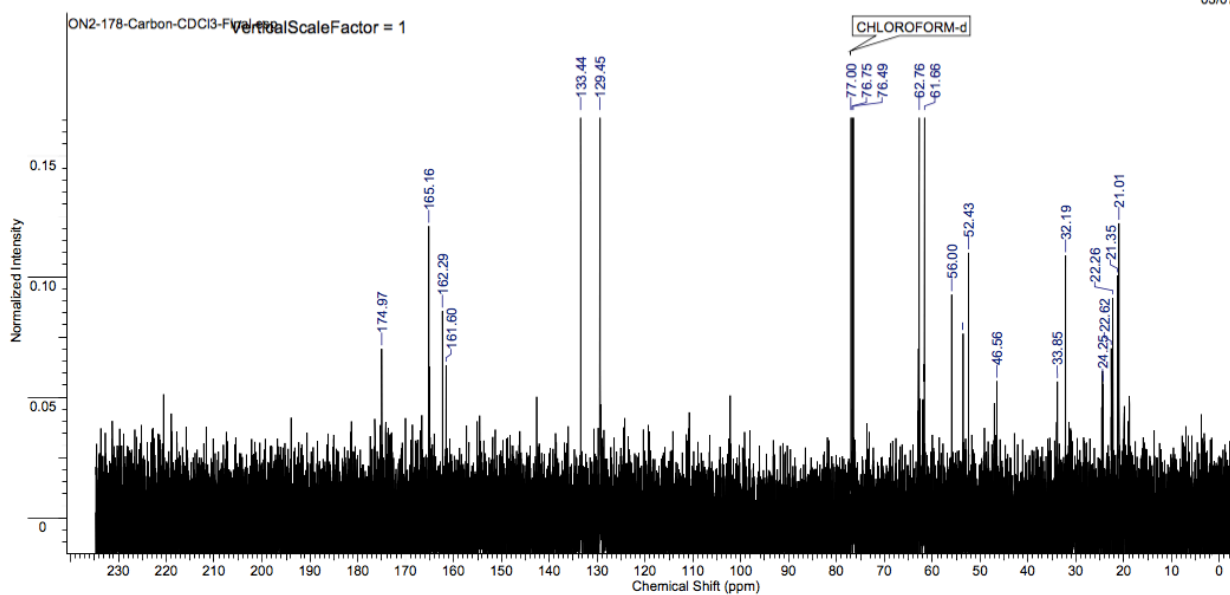

**Figure S97.**  $^{13}\text{C}$  NMR for poly(BHEC/BHET) with 50% BHEC (Table S2, Entry 6)

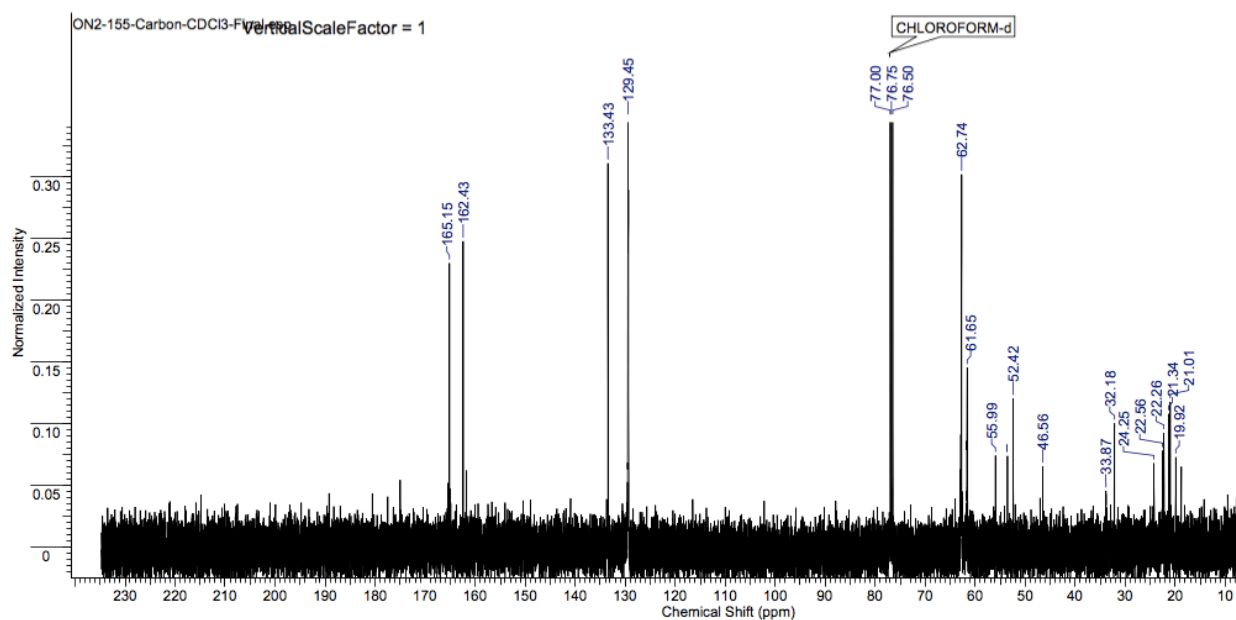

**Figure S98.**  $^{13}\text{C}$  NMR for poly(BHEC/BHET) with 40% BHEC (Table S2, Entry 7)

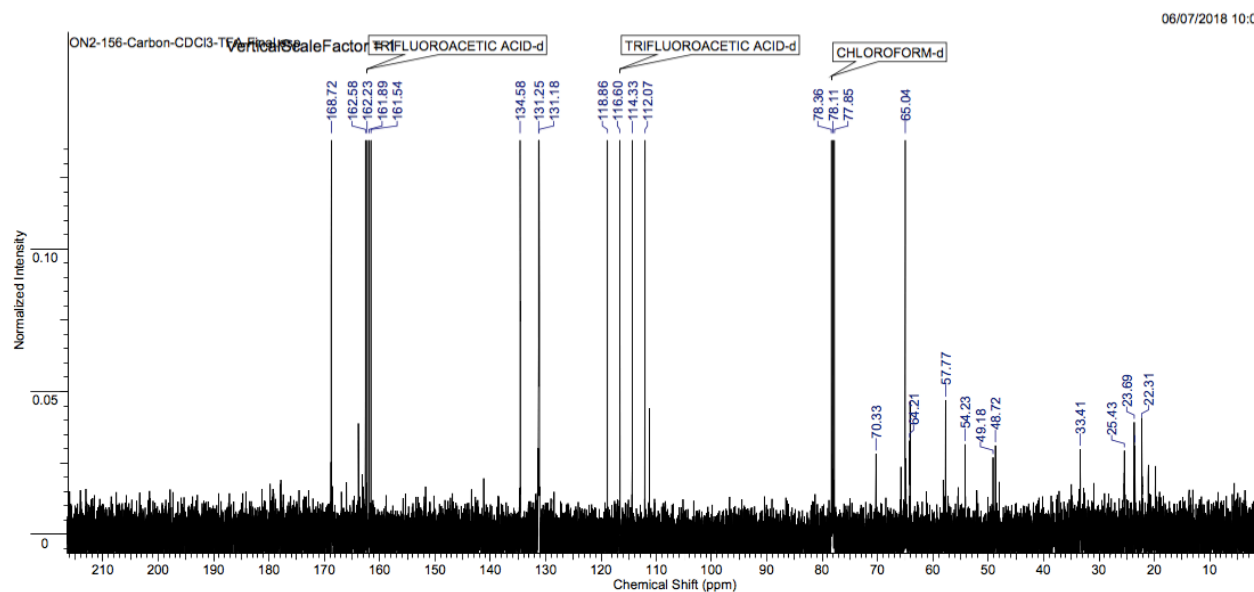

**Figure S99.**  $^{13}\text{C}$  NMR for poly(BHEC/BHET) with 30% BHEC (Table S2, Entry 8)

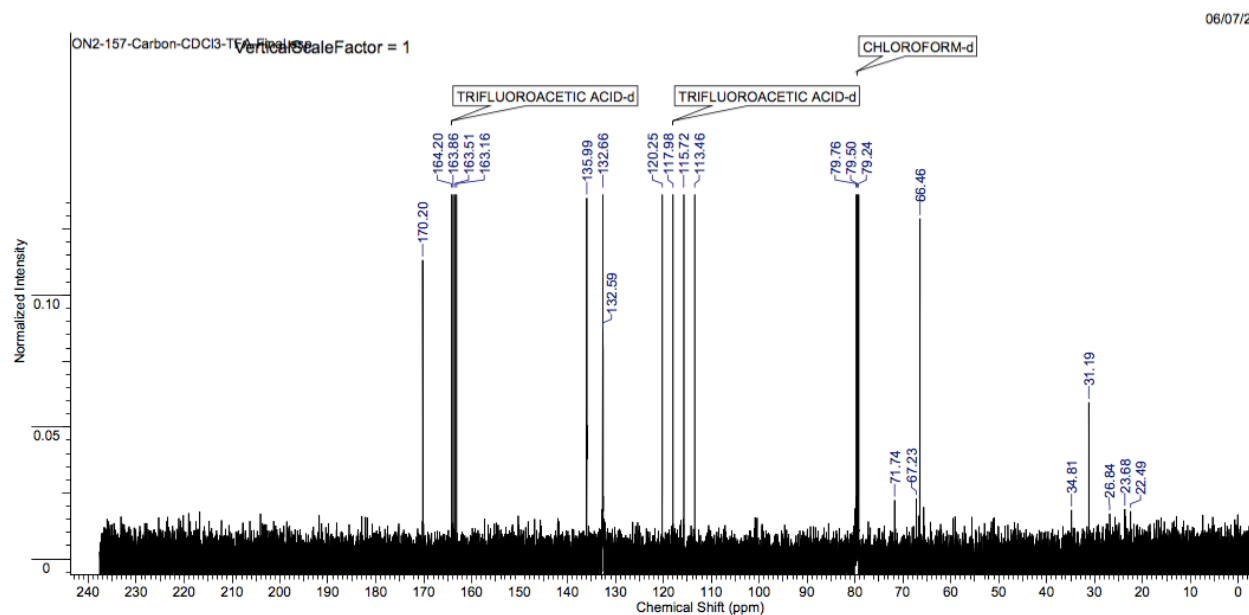

**Figure S100.**  $^{13}\text{C}$  NMR for poly(BHEC/BHET) with 20% BHEC (Table S2, Entry 9)

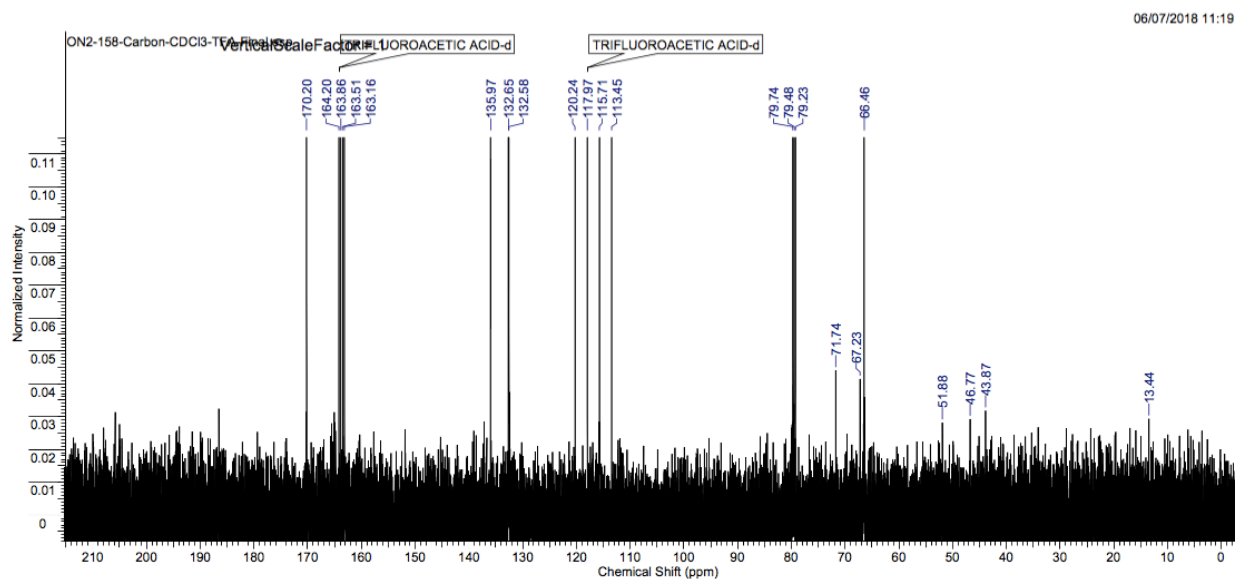

**Figure S101.**  $^{13}\text{C}$  NMR for poly(BHEC/BHET) with 10% BHEC Table (S2, Entry 10)

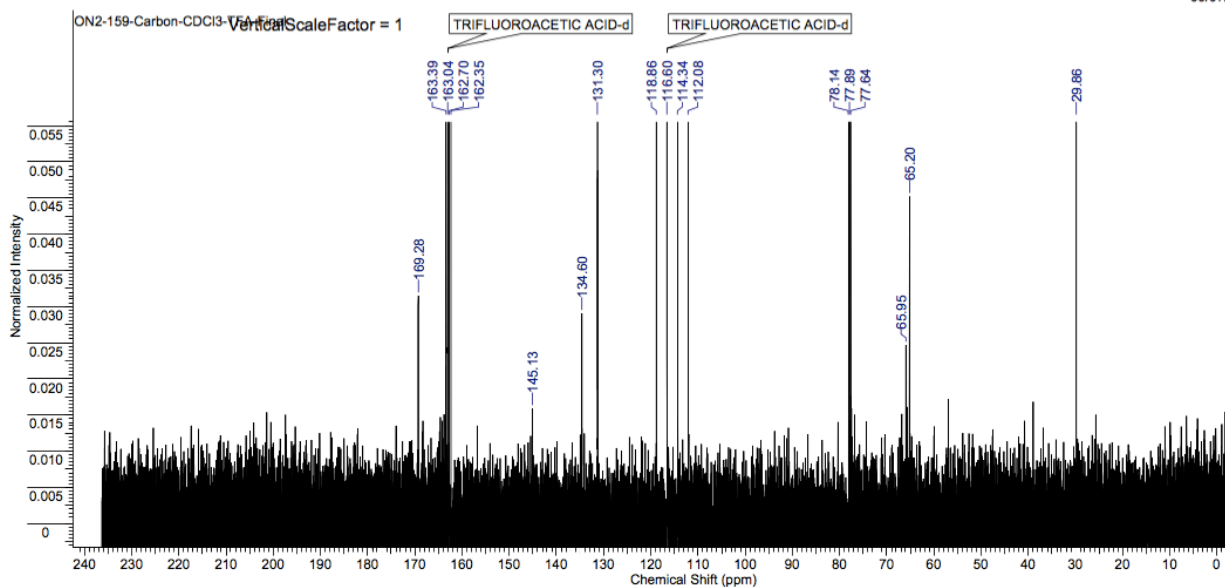

**Figure S102.**  $^{13}\text{C}$  NMR for polyBHET (Table S2, Entry 11)

## Analysis of Copolymer Composition for Polyethylene (Camphorate/Terephthalate)

For the copolymers of Table S2, the BHEC incorporation percentage was determined by  $^1\text{H}$  NMR by integrating the 1-methyl group of the camphoric acid ring (near 0.77 ppm) versus the aromatic protons of the terephthalate ring (near 8.1 ppm). The integration values, taken from the spectra in **Figures S71–S81**, are given below in Table S4.

**Table S4** Incorporation fraction of bis(hydroxyethyl) camphorate (BHEC, from camphoric acid) and bis(hydroxyethyl) terephthalate (BHET, from terephthalic acid) for polyethylene (camphorate/terephthalate) copolymers as described in Table S2.

| Entry | BHEC % Feed | BHEC methyl integration ( $^1\text{H}$ NMR) | BHET Ar-H integration ( $^1\text{H}$ NMR) | BHEC % Incorporation ( $^1\text{H}$ NMR) | BHET % Incorporation ( $^1\text{H}$ NMR) | BHEC % for $r_{\text{BHEC}} = 0.47$<br>$r_{\text{BHET}} = 2.26$ |
|-------|-------------|---------------------------------------------|-------------------------------------------|------------------------------------------|------------------------------------------|-----------------------------------------------------------------|
| 1     | 100         | 2.95                                        | 0.00                                      | 100.0                                    | 0.0                                      | 100.0                                                           |
| 2     | 90          | 2.99                                        | 0.82                                      | 82.9                                     | 17.1                                     | 80.8                                                            |
| 3     | 80          | 3.00                                        | 2.08                                      | 65.8                                     | 34.2                                     | 64.9                                                            |
| 4     | 70          | 3.22                                        | 3.85                                      | 52.7                                     | 47.3                                     | 51.7                                                            |
| 5     | 60          | 2.95                                        | 7.65                                      | 34.0                                     | 66.0                                     | 40.6                                                            |
| 6     | 50          | 1.38                                        | 3.99                                      | 31.6                                     | 68.4                                     | 31.1                                                            |
| 7     | 40          | 0.86                                        | 4.01                                      | 22.2                                     | 77.8                                     | 23.1                                                            |
| 8     | 30          | 0.75                                        | 4.04                                      | 19.8                                     | 80.2                                     | 16.1                                                            |
| 9     | 20          | 0.42                                        | 3.99                                      | 12.3                                     | 87.7                                     | 10.0                                                            |
| 10    | 10          | 0.24                                        | 3.91                                      | 7.6                                      | 92.4                                     | 4.7                                                             |
| 11    | 0           | 0.00                                        | 4.00                                      | 0.0                                      | 100.0                                    | 0.0                                                             |

Since the methyl group bears 3 hydrogens and the aromatic phenylene component bears 4 hydrogens, the molar percent of BHEC in the copolymer is calculated according to

$$\text{BHEC \% Incorporation} = \frac{[(\text{BHEC integration}) / 3]}{[(\text{BHEC integration}) / 3] + [(\text{BHET integration}) / 4]}$$

The reactivity ratios reported in Figure S103 below were calculated with an excel spreadsheet (Table S5) according to the copolymer molar composition equation, usually applied to chain-growth copolymerization, but mathematically applicable to step-growth copolymerization as well:

$$F_C = \frac{r_C f_C^2 + f_C f_T}{r_C f_C^2 + 2 f_C f_T + r_T f_T^2}$$

where

$r_C = r_{\text{BHEC}}$  = the reactivity ratio of bis(hydroxyethyl) camphorate, BHEC

$r_T = r_{\text{BHET}}$  = the reactivity ratio of bis(hydroxyethyl) terephthalate, BHET

$f_C$  = the feed fraction of bis(hydroxyethyl) camphorate, BHEC

$f_T$  = the feed fraction of bis(hydroxyethyl) terephthalate, BHET

$F_C = 1 - F_T$  = the composition fraction of bis(hydroxyethyl) camphorate, BHEC

$F_T$  = the composition fraction of bis(hydroxyethyl) terephthalate, BHET

Note in this copolymerization,

$$r_C = r_{\text{BHEC}} = k_{\text{CC}} / k_{\text{CT}} \quad \text{and}$$

$$r_T = r_{\text{BHET}} = k_{\text{TT}} / k_{\text{TC}}$$

But, the chain end for BHEC and BHET are nearly identical, with both ending in  $\text{C(O)OCH}_2\text{CH}_2\text{OH}$ . So the following approximation applies:

$$r_C = r_{\text{BHEC}} \sim k_C / k_T \quad \text{and}$$

$$r_T = r_{\text{BHET}} \sim k_T / k_C$$

where  $k_C$  is the reaction rate constant of *any* chain end with BHEC and  $k_T$  is the reaction rate constant of *any* chain end with BHET.

This suggests that  $r_C$  and  $r_T$  should bear a reciprocal relationship, which is essentially true:

$$r_C = 0.47$$

$$1 / 0.47 = 2.12$$

$$r_T = 2.26$$

$$1 / 2.26 = 0.44$$

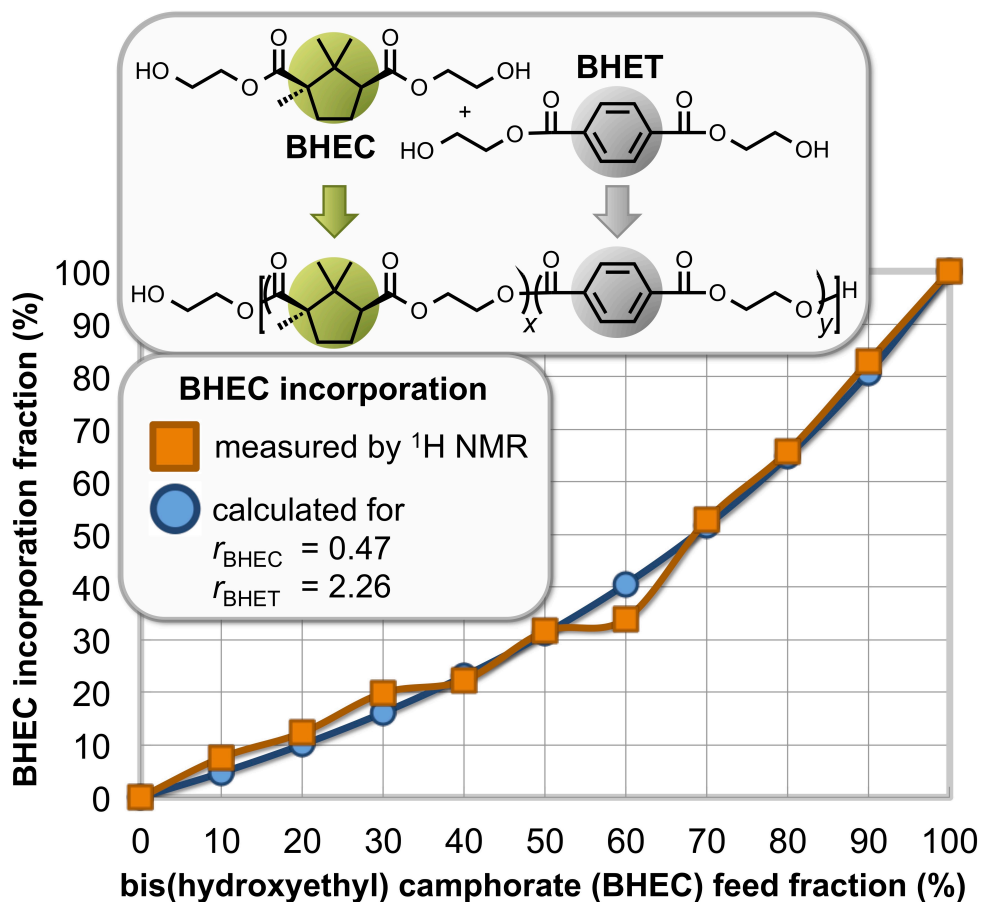

**Figure S103.** BHEC incorporation fraction (%) as a function of the BHEC feed fraction (%) as determined experimentally (squares, by  $^1\text{H}$  NMR) and calculated with  $r_{\text{BHEC}} = 0.47$  and  $r_{\text{BHET}} = 2.26$  (circles). RMS error = 2.67.

**Table S5** Excel spreadsheet showing calculations for the determination of reactivity ratios  $r_{\text{BHEC}}$ ,  $r_{\text{BHET}}$ , and the RMS (root mean square) error.

|           |                  | BHEC | r1  | 0.47    |          |           |             |
|-----------|------------------|------|-----|---------|----------|-----------|-------------|
|           |                  | BHET | r2  | 2.26    |          |           |             |
| BHEC feed | NMR BHEC incorp. | f1   | f2  | F1 calc | F1 * 100 | diff      | square      |
| 100       | 100.00           | 1    | 0   | 1.000   | 100.0    | 0.000000  | 0.000000    |
| 90        | 82.94            | 0.9  | 0.1 | 0.808   | 80.8     | 2.174197  | 4.727134    |
| 80        | 65.79            | 0.8  | 0.2 | 0.649   | 64.9     | 0.909059  | 0.826388    |
| 70        | 52.72            | 0.7  | 0.3 | 0.517   | 51.7     | 1.062679  | 1.129288    |
| 60        | 33.96            | 0.6  | 0.4 | 0.406   | 40.6     | -6.596201 | 43.509861   |
| 50        | 31.56            | 0.5  | 0.5 | 0.311   | 31.1     | 0.428387  | 0.183515    |
| 40        | 22.24            | 0.4  | 0.6 | 0.231   | 23.1     | -0.829923 | 0.688773    |
| 30        | 19.84            | 0.3  | 0.7 | 0.161   | 16.1     | 3.742346  | 14.005151   |
| 20        | 12.31            | 0.2  | 0.8 | 0.100   | 10.0     | 2.277095  | 5.185162    |
| 10        | 7.57             | 0.1  | 0.9 | 0.047   | 4.7      | 2.859575  | 8.177168    |
| 0         | 0.00             | 0    | 1   | 0.000   | 0.0      | 0.000000  | 0.000000    |
|           |                  |      |     |         |          | AVE       | 7.130221713 |
|           |                  |      |     |         |          | RMS error | 2.6702475   |



## Degradation Studies

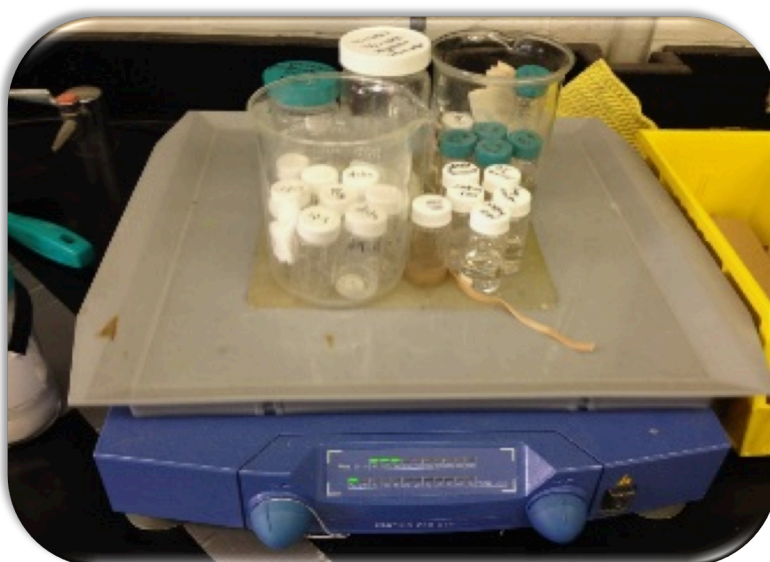

**Figure S104.** Polymers were left on an orbital shaker for 14 days.

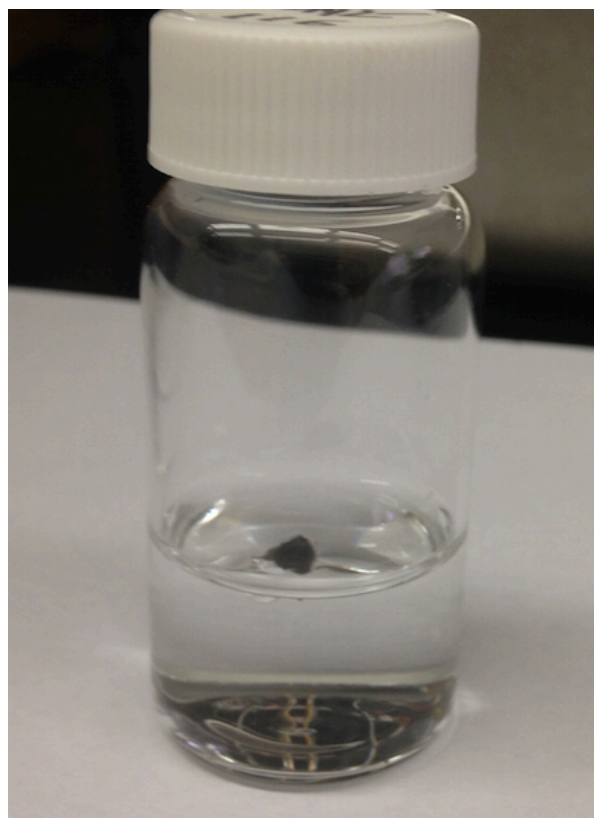

**Figure S105.** On Day 1, this polyethylene camphorate has not undergone significant gelation or degradation.

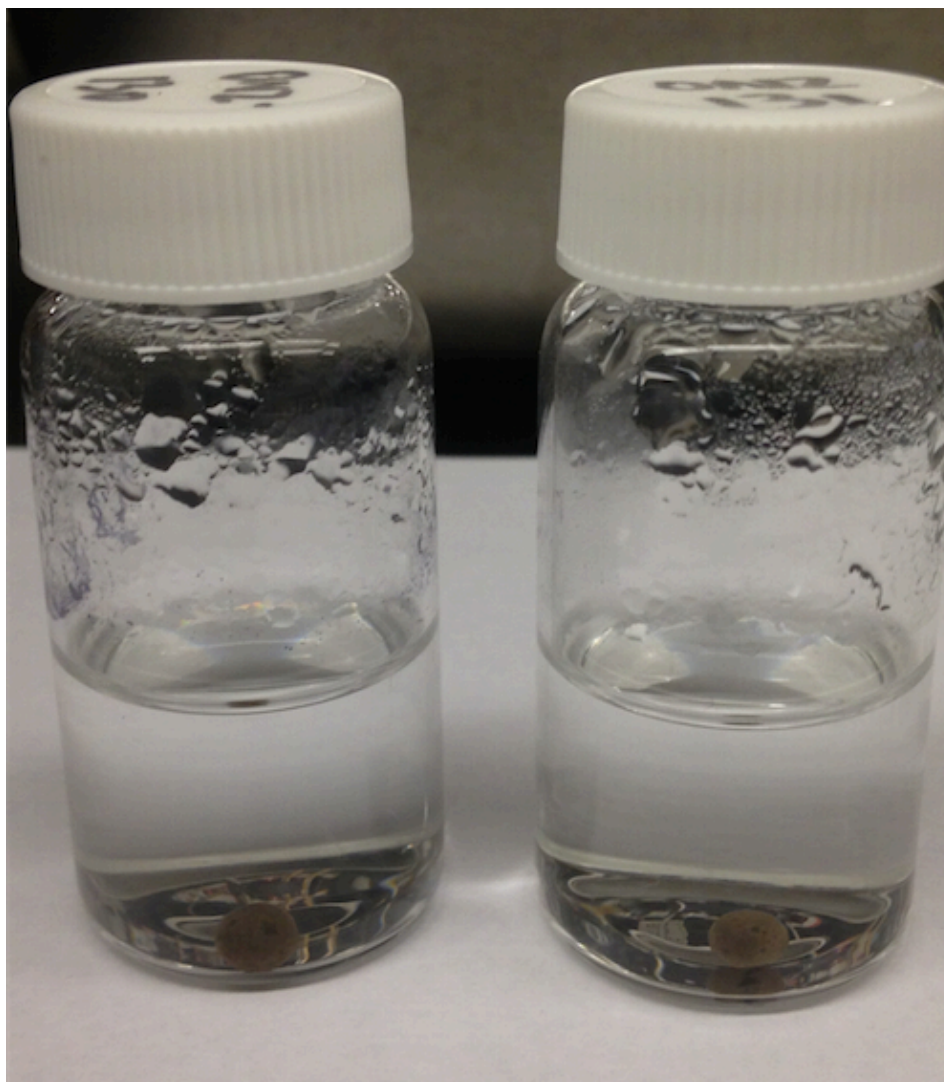

**Figure S106.** After 14 days, the polyethylene camphorate (at bottom) shows obvious signs of swelling (gelation), having assumed a spherical shape.

| <b>Table S6</b> Molecular weight data for the aqueous degradation study of polyethylene camphorate (from Table S1, Entry 2) <sup>a</sup> |                                                                                     |                           |                           |                                         |               |                 |
|------------------------------------------------------------------------------------------------------------------------------------------|-------------------------------------------------------------------------------------|---------------------------|---------------------------|-----------------------------------------|---------------|-----------------|
| Entry                                                                                                                                    | Polymer                                                                             | Initial                   |                           | <i>M<sub>n</sub></i> (Da) After 14 days |               |                 |
|                                                                                                                                          |                                                                                     | <i>M<sub>n</sub></i> (Da) | <i>M<sub>w</sub></i> (Da) | pH = 1 buffer                           | pH = 2 buffer | deionized water |
| 1                                                                                                                                        | 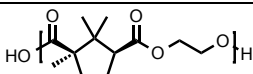 | 20,200                    | 60,800                    | < 600                                   |               |                 |
| 2                                                                                                                                        |  | 20,200                    | 60,800                    | < 600                                   |               |                 |
| 3                                                                                                                                        |  | 20,200                    | 60,800                    | < 600                                   |               |                 |

<sup>a</sup> Gel permeation chromatography (GPC) in hexafluoroisopropanol (HFIP) at 40 °C vs polymethylmethacrylate standards.

## GPC data for the degradation studies

### Molecular Weight Averages

| Peak   | Mp | Mn | Mw | Mz | Mz+1 | Mv    | PD |
|--------|----|----|----|----|------|-------|----|
| Peak 1 | 0  | 0  | 0  | 0  | 0    | 32780 | 0  |

### Peak information

|                   | Start (mins) | End (mins) |
|-------------------|--------------|------------|
| Baseline region 1 | 4.91         | 10.18      |
| Baseline region 2 | 29.68        | 30.00      |
| Peak 1            | 15.46        | 26.91      |

| Peak   | Trace | Peak Max RT (mins) | Peak Area (mV.s) | Peak Height (mV) |
|--------|-------|--------------------|------------------|------------------|
| Peak 1 | RI    | 22.79              | 11217559.518     | 40848.608        |

### Chromatogram

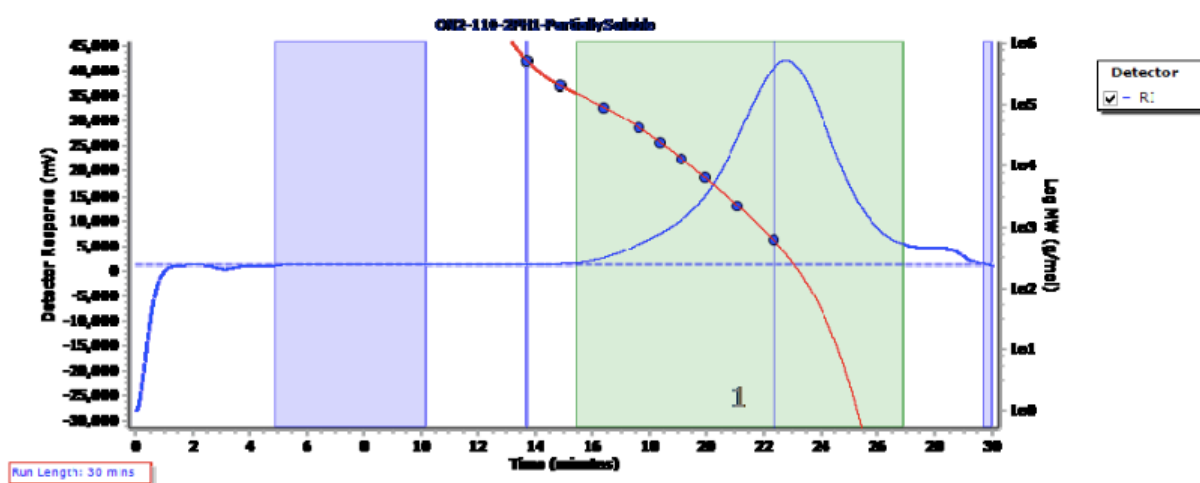

**Figure S107.** GPC chromatogram for polyethylene camphorate in **aqueous pH = 1** buffer after 14 days. The peak max (22.79 minutes) appears after the lowest molecular weight PMMA standard (22.4 minutes, 600 Da).

# Molecular Weight Averages

| Peak   | Mp | Mn | Mw | Mz | Mz+1 | Mv    | PD |
|--------|----|----|----|----|------|-------|----|
| Peak 1 | 0  | 0  | 0  | 0  | 0    | 40152 | 0  |

# Peak information

|                   | Start (mins) | End (mins) |
|-------------------|--------------|------------|
| Baseline region 1 | 2.47         | 6.80       |
| Baseline region 2 | 29.60        | 29.97      |
| Peak 1            | 14.69        | 27.17      |

| Peak   | Trace | Peak Max RT (mins) | Peak Area (mV.s) | Peak Height (mV) |
|--------|-------|--------------------|------------------|------------------|
| Peak 1 | RI    | 22.69              | 8769469.371      | 31070.980        |

# Chromatogram

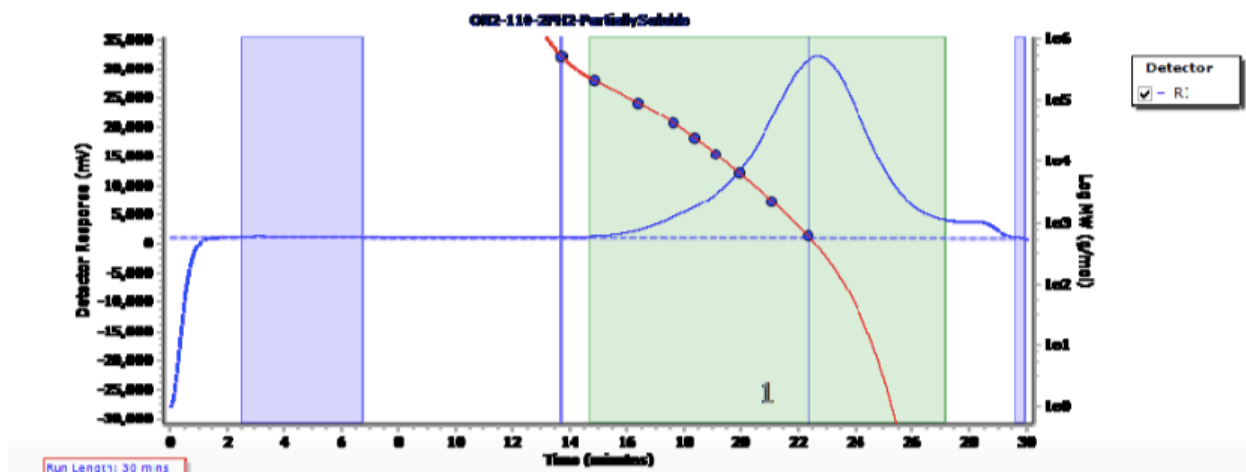

**Figure S108.** GPC chromatogram for polyethylene camphorate in **aqueous pH = 2** buffer after 14 days. The peak max (22.69 minutes) appears after the lowest molecular weight PMMA standard (22.4 minutes, 600 Da).

# Molecular Weight Averages

| Peak   | Mp     | Mn     | Mw     | Mz     | Mz+1   | Mv     | PD    |
|--------|--------|--------|--------|--------|--------|--------|-------|
| Peak 1 | 267341 | 240218 | 260528 | 283755 | 308491 | 280139 | 1.085 |
| Peak 2 | 0      | 0      | 0      | 0      | 0      | 32006  | 0     |

# Peak information

|                   | Start (mins) | End (mins) |
|-------------------|--------------|------------|
| Baseline region 1 | 6.07         | 8.23       |
| Baseline region 2 | 29.43        | 29.72      |
| Peak 1            | 13.73        | 15.34      |
| Peak 2            | 15.78        | 27.35      |

| Peak   | Trace | Peak Max RT (mins) | Peak Area (mV.s) | Peak Height (mV) |
|--------|-------|--------------------|------------------|------------------|
| Peak 1 | RI    | 14.43              | 74359.822        | 1026.219         |
| Peak 2 | RI    | 23.07              | 9328555.287      | 35433.566        |

# Chromatogram

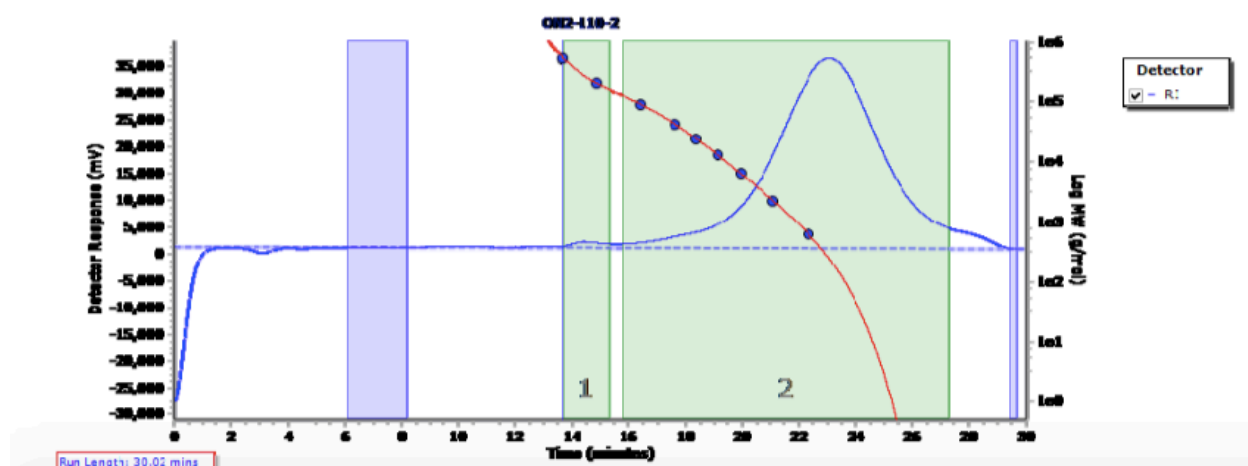

**Figure S109.** GPC chromatogram for polyethylene camphorate in **deionized water** after 14 days. The peak max (23.07 minutes) appears after the lowest molecular weight PMMA standard (22.4 minutes, 600 Da).
